# Supplementary material for: Copper ferrite nanoparticles catalyzed the challenging Diels–Alder reaction of aromatic chalcones with cyclopentadiene
Source: Royal Society of Chemistry journal article supplement (doi:10.1039/d3cc02290k), 2023-01-01

# Copper Ferrite Nanoparticles Catalyzed Challenging Diels-Alder Reaction of Aromatic Chalcones with Cyclopentadiene

Divya Tagra, Meha Bhargava, Jyoti Agarwal\*

\*Department of Chemistry and Centre of Advanced Studies, Panjab University, Sector-14, Chandigarh, INDIA-160014

Email: [jyotiagarwa@gmail.com](mailto:jyotiagarwa@gmail.com), [jagarwal@pu.ac.in](mailto:jagarwal@pu.ac.in)

## Table of Contents

| S. No. | Contents                                               | Page No. |
|--------|--------------------------------------------------------|----------|
| 1.     | Experimental Section                                   | 2-10     |
|        | 1.1 Materials & Methods                                |          |
|        | 1.2 Characterization Data                              |          |
| 2.     | References                                             | 10       |
| 3.     | Copies of $^1\text{H}$ and $^{13}\text{C}$ NMR Spectra | 11-46    |

## 1. EXPERIMENTAL SECTION

### 1.1 Materials & Methods

Cyclopentadiene, isoprene and metal ferrites ( $\text{CuFe}_2\text{O}_4$ , particle size  $<100$  nm;  $\text{CoFe}_2\text{O}_4$ , particle size = 30 nm) were purchased from Sigma Aldrich. All the other metal salts were purchased from AVRA and were used as such without further purification. Chalcones were synthesized as per the procedure reported in literature.<sup>1,2</sup> Solvents were dried and purified according to standard procedures before use. Melting points were obtained on a Thomas-Hoover apparatus in open capillaries and are uncorrected. FTIR spectra were recorded using Bruker alpha Eco-ATR spectrometer in the spectral region of  $4000\text{-}650\text{ cm}^{-1}$ .  $^1\text{H-NMR}$  spectra were recorded on Bruker Avance Neo 500 MHz spectrometer in  $\text{CDCl}_3$  solvent. Spectroscopic data are represented as follows: chemical shift (ppm), multiplicity (s = singlet, d = doublet, t = triplet, dd = doublet of doublets m = multiplet, br = broad singlet, ddd = doublet of doublet of doublet, dddd = doublet of doublet of doublet of doublet, td = triplet of doublet, dt = doublet of triplet, qd = quartet of doublet), integration, coupling constants in Hertz (Hz).  $^{13}\text{C}$  NMR spectra were recorded at 125 MHz in  $\text{CDCl}_3$  relative to trimethylsilane as internal standard. Crude products were isolated and purified by column chromatography over 230-400 mesh size silica gel using hexane:ethyl acetate as eluents. The progress of the reaction was monitored by thin layer chromatography (TLC) on silica coated aluminum plates F<sub>254</sub> and visualized under UV chamber.

### 1.2 Characterization Data

Phenyl(3-phenylbicyclo[2.2.1]hept-5-en-2-yl)methanone (**3a**)

**Results:** 89% yield, pale-yellow oily liquid, dr = 65:35 (*endo:exo*); **IR (ATR):**  $\nu_{\text{max}}$  3058, 3022, 2992, 2970, 1668, 1596, 1447, 1333, 1215, 1014, 745, 692, 665  $\text{cm}^{-1}$ ;  **$^1\text{H-NMR}$  (500 MHz,  $\text{CDCl}_3$ ):**  $\delta$  7.96-7.92 (m, 1.36H (*endo*)), 7.91-7.88 (m, 0.70H (*exo*)), 7.56-7.49 (m, 1H), 7.46-7.37 (m, 2H), 7.31-7.27 (m, 3H), 7.25-7.15 (m, 2H), 6.49-6.46 (m, 1H), 6.17 (dd,  $J = 2.5$  Hz, 5.5 Hz, 0.35H (*exo*)), 5.87 (dd,  $J = 3.0$  Hz, 6.0 Hz, 0.65H (*endo*)), 3.91 (dd,  $J = 3.5$  Hz, 5.0 Hz, 1H), 3.47 (dd,  $J = 1.5$  Hz, 5.0 Hz, 0.65H (*endo*)), 3.44 (dd,  $J = 1.5$  Hz, 5.0 Hz, 0.35H (*exo*)), 3.34 (s, 0.65H

(endo)), 3.18 (s, 0.35H (exo)), 3.11-3.15 (m, 1H), 2.03 (d,  $J = 8.5$  Hz, 0.65H (endo)), 1.90 (d,  $J = 8.5$  Hz, 0.35H (exo)), 1.65 (dq,  $J = 2.0, 8.5$  Hz, 0.65H (endo)), 1.54 (dq,  $J = 1.5$  Hz, 8.5 Hz, 0.35H (exo)) ppm;  $^{13}\text{C NMR}$  (125 MHz,  $\text{CDCl}_3$ ):  $\delta$  201.3, 200.1, 144.8, 143.6, 139.3, 137.3, 137.0, 136.9, 136.6, 133.1, 133.0, 132.9, 128.7, 128.6, 128.5, 128.2, 128.1, 127.6, 126.3, 126.1, 56.3, 54.6, 49.0, 48.9, 48.7, 48.6, 48.1, 47.9, 47.8, 45.9 ppm.

#### 4-Fluorophenyl-(3-phenylbicyclo[2.2.1]hept-5-en-2-yl)methanone (**3b**)

**Results:** 68% yield, colorless oily liquid, dr = 70:30 (endo:exo); **IR (ATR):**  $\nu_{\text{max}}$  3059, 3027, 2986, 1676, 1495, 1454, 1333, 1219, 1016, 834, 746, 700  $\text{cm}^{-1}$ ;  **$^1\text{H-NMR}$  (500 MHz,  $\text{CDCl}_3$ ):**  $\delta$  8.12 (dd,  $J = 5.5$  Hz, 8.5 Hz, 1.47H (endo)), 8.05 (dd,  $J = 5.5$  Hz, 8.5 Hz, 0.63H (exo)), 7.48-7.38 (m, 4H), 7.37-7.29 (m, 1H), 7.26 (t,  $J = 8.5$  Hz, 1.39H (endo)), 7.20 (t,  $J = 8.5$  Hz, 0.66H (exo)), 6.63 (dd,  $J = 3.0$  Hz, 5.0 Hz, 1H), 6.33 (dd,  $J = 3.0$  Hz, 5.5 Hz, 0.30H (exo)), 6.04 (dd,  $J = 2.5$  Hz, 5.5 Hz, 0.70H (endo)), 4.02 (dd,  $J = 3.5$  Hz, 5.0 Hz, 0.70H (endo)), 3.99 (dd,  $J = 5.0$  Hz, 8.5 Hz, 0.30H (exo)), 3.60 (d,  $J = 4.0$  Hz, 0.70H (endo)), 3.53 (d,  $J = 4.5$  Hz, 0.30H (exo)), 3.49 (s, 0.70H (endo)), 3.32 (s, 0.30H (exo)), 3.29 (s, 0.30H), 3.28 (s, 0.70H), 2.19 (d,  $J = 8.5$  Hz, 0.70H (endo)), 2.05 (d,  $J = 9.0$  Hz, 0.30H (exo)), 1.82 (dd,  $J = 1.5$  Hz, 8.5 Hz, 0.70H (endo)), 1.72 (dd,  $J = 1.0$  Hz, 8.5 Hz, 0.30H (exo)) ppm;  $^{13}\text{C NMR}$  (125 MHz,  $\text{CDCl}_3$ ):  $\delta$  199.8, 198.5, 165.7(d,  $J = 250$  Hz) 165.7(d,  $J = 250$  Hz), 144.6, 143.4, 139.4, 137.0, 136.6, 133.7 (d,  $J = 2.5$  Hz), 133.4 (d,  $J = 2.5$  Hz), 133.0, 131.2 (d,  $J = 10.0$  Hz), 131.0 (d,  $J = 10.0$  Hz), 128.7, 128.3, 128.1, 127.6, 126.5, 126.2, 115.7(d,  $J = 12.5$  Hz), 115.7 (d,  $J = 15$  Hz), 115.6, 115.6, 56.3, 54.6, 49.1, 48.8, 48.7, 48.7, 48.2, 48.1, 46.2 ppm.

#### 4-Chlorophenyl-(3-phenylbicyclo[2.2.1]hept-5-en-2-yl)methanone (**3c**)

**Results:** 70% yield, colorless oily liquid, dr = 75:25 (endo:exo); **IR (ATR):**  $\nu_{\text{max}}$  3058, 3022, 2992, 2970, 1668, 1596, 1447, 1214, 1014, 745, 692, 665  $\text{cm}^{-1}$ ;  **$^1\text{H-NMR}$  (500 MHz,  $\text{CDCl}_3$ ):**  $\delta$  7.85 (d,  $J = 8.5$  Hz, 1.56H (endo)), 7.78 (d,  $J = 8.5$  Hz, 0.53H (exo)), 7.38 (d,  $J = 8.5$  Hz, 1.57H (endo)), 7.33 (d,  $J = 8.5$  Hz, 0.59H (exo)), 7.30-7.11 (m, 5H), 6.45 (dd,  $J = 3.5$  Hz, 5.0 Hz, 1H), 6.15 (dd,  $J = 2.5$  Hz, 5.5 Hz, 0.25H (exo)), 5.86 (dd,  $J = 2.5$  Hz, 5.5 Hz, 0.75H (endo)), 3.84 (dd,  $J = 3.5$  Hz, 5.0 Hz, 0.75H (endo)), 3.81 (dd,  $J = 4.0$  Hz, 5.0 Hz, 0.25H (exo)), 3.42 (d,  $J = 4.0$  Hz, 0.75H (endo)), 3.35 (d,  $J = 4.5$  Hz, 0.25H (exo)), 3.30 (s, 0.75H (endo)), 3.15 (s, 0.25H (exo)), 3.12 (s, 0.25H), 3.10 (s, 0.75H), 2.01 (d,  $J = 8.5$  Hz, 0.75H

(endo)), 1.86 (d,  $J = 8.5$  Hz, 0.25H (*exo*)), 1.64 (dd,  $J = 8.5$  Hz, 1.0 Hz, 0.75H (*endo*)), 1.54 (dd,  $J = 8.5$  Hz, 1.5 Hz, 0.25H (*exo*)) ppm;  $^{13}\text{C}$  NMR (125 MHz,  $\text{CDCl}_3$ ):  $\delta$  200.6, 199.3, 144.9, 143.7, 139.9, 139.8, 139.7, 137.4, 137.0, 136.0, 135.7, 133.4, 130.4, 130.3, 129.4, 129.3, 129.1, 128.7, 128.5, 128.0, 126.9, 126.6, 56.7, 49.1, 49.0, 48.6, 48.5, 46.5 ppm.

#### 4-Bromophenyl(3-phenylbicyclo[2.2.1]hept-5-en-2-yl)methanone (3d)

**Results:** 68% yield, colorless oily liquid, dr = 75:25 (*endo:exo*); **IR (ATR):**  $\nu_{\text{max}}$  3057, 3025, 2966, 1740, 1674, 1451, 1366, 1221, 1013, 797, 718, 699  $\text{cm}^{-1}$ ;  **$^1\text{H}$ -NMR (500 MHz,  $\text{CDCl}_3$ ):**  $\delta$  7.78 (dd,  $J = 2.0$  Hz, 7.0 Hz, 1.60H (*endo*)), 7.72 (dd,  $J = 2.0$  Hz, 7.0 Hz, 0.57H (*exo*)), 7.56 (dd,  $J = 2.0$  Hz, 6.5 Hz, 1.54H (*endo*)), 7.51 (dd,  $J = 1.5$  Hz, 6.5 Hz, 0.52H (*exo*)), 7.32-7.27 (m, 3H), 7.25-7.12 (m, 2H), 6.48-6.44 (m, 1H), 6.16 (dd,  $J = 3.0$  Hz, 5.5 Hz, 0.25H (*exo*)), 5.87 (dd,  $J = 3.0$  Hz, 6.0 Hz, 0.75H (*endo*)), 3.84 (dd,  $J = 3.5$  Hz, 5.0 Hz, 0.75H (*endo*)), 3.81 (dd,  $J = 5.0$  Hz, 3.5 Hz, 0.25H (*exo*)), 3.43 (d,  $J = 3.5$  Hz, 0.75H (*endo*)), 3.35 (dd,  $J = 1.5$  Hz, 5.5 Hz, 0.25H (*exo*)), 3.31 (s, 0.75H (*endo*)), 3.16 (s, 0.25H (*exo*)), 3.12 (s, 0.25H (*exo*)), 3.11 (s, 0.75H (*endo*)), 2.02 (d,  $J = 8.5$  Hz, 0.75H (*endo*)), 1.87 (d,  $J = 8.5$  Hz, 0.25H (*exo*)), 1.65 (dd,  $J = 1.5$  Hz, 8.5 Hz, 0.75H (*endo*)), 1.55 (dd,  $J = 2.0$  Hz, 9.0 Hz, 0.25H (*exo*)) ppm;  $^{13}\text{C}$  NMR (125 MHz,  $\text{CDCl}_3$ ):  $\delta$  200.3, 199.1, 144.4, 143.2, 139.3, 136.9, 136.5, 135.9, 135.6, 132.9, 131.9, 131.8, 130.0, 129.9, 128.6, 128.2, 128.0, 127.9, 127.5, 126.4, 126.1, 56.2, 54.5, 49.0, 48.7, 48.6, 48.5, 48.2, 48.1, 48.0, 46.1 ppm.

#### (3-Phenylbicyclo[2.2.1]hept-5-en-2-yl)(*p*-tolyl)methanone (3e)

**Results:** 52% yield, yellow oily liquid, dr = 70:30 (*endo:exo*); **IR (ATR):**  $\nu_{\text{max}}$  3060, 3024, 2967, 1668, 1598, 1455, 1330, 1256, 1219, 1019, 836, 745, 715  $\text{cm}^{-1}$ ;  **$^1\text{H}$ -NMR (500 MHz,  $\text{CDCl}_3$ ):**  $\delta$  7.84 (d,  $J = 8.0$  Hz, 1.47H (*endo*)), 7.79 (d,  $J = 8.5$  Hz, 0.64H (*exo*)), 7.31-7.15 (m, 7H), 6.46 (dd,  $J = 4.0$  Hz, 7.5 Hz, 1H), 6.16 (dd,  $J = 3.0$  Hz, 5.5 Hz, 0.30H (*exo*)), 5.87 (dd,  $J = 2.5$  Hz, 5.5 Hz, 0.70H (*endo*)), 3.93-3.87 (m, 1H), 3.48 (d,  $J = 3.5$  Hz, 0.70H (*endo*)), 3.41 (d,  $J = 4.5$  Hz, 0.30H (*exo*)), 3.33 (s,  $J = 4.5$  Hz, 0.70H (*endo*)), 3.17 (s, 0.30H (*exo*)), 3.12 (s, 1H), 2.40 (s, 2H,  $\text{CH}_3$  (*endo*)), 2.38 (s, 1H,  $\text{CH}_3$  (*exo*)), 2.02 (d,  $J = 8.0$  Hz, 0.70H (*endo*)), 1.90 (d,  $J = 8.5$  Hz, 0.30H (*exo*)), 1.64 (dd,  $J = 1.5$  Hz, 8.0 Hz, 1.06H (*endo*)),

1.53 (dd,  $J = 1.0$  Hz, 8.5 Hz, 0.48H (*exo*)) ppm;  $^{13}\text{C NMR}$  (125 MHz,  $\text{CDCl}_3$ ):  $\delta$  199.7, 198.4, 163.3, 139.0, 130.7, 128.5, 128.2, 128.1, 127.5, 125.9, 113.8, 113.7, 55.8, 55.5, 48.8, 48.5, 45.9, 32.0, 27.1, 26.4, 24.2 ppm.

4-Methoxyphenyl(3-phenylbicyclo[2.2.1]hept-5-en-2-yl)methanone (**3f**)

**Results:** 62% yield, yellow oily liquid, dr = 92:8 (*endo:exo*); **IR (ATR):**  $\nu_{\text{max}}$  3023, 2954, 2925, 1740, 1669, 1603, 1449, 1367, 1223, 1017, 817, 746, 698  $\text{cm}^{-1}$ ;  **$^1\text{H-NMR}$  (500 MHz,  $\text{CDCl}_3$ ):**  $\delta$  7.93 (dt,  $J = 3.0$  Hz, 10.0 Hz, 1.90H (*endo*)) 7.86 (dd,  $J = 2.0$  Hz, 7.0 Hz, 0.18H (*exo*)), 7.31-7.25 (m, 4H), 7.23-7.15 (m, 1H), 6.90 (dd,  $J = 2.0$  Hz, 7.0 Hz, 1.90H (*endo*)), 6.85 (dd,  $J = 2.5$  Hz, 7.0 Hz, 0.21H (*exo*)), 6.47-6.44 (m, 1H), 6.16 (dd,  $J = 2.5$  Hz, 5.5 Hz, 0.08H (*exo*)), 5.88 (dd,  $J = 2.5$  Hz, 5.5 Hz, 0.92H (*endo*)), 3.88-3.84 (m, 4H), 3.46 (dd,  $J = 2.0$  Hz, 5.0 Hz, 0.92H (*endo*)), 3.38 (dd,  $J = 1.5$  Hz, 5.5 Hz, 0.08H (*exo*)), 3.32 (s, 0.92H (*endo*)), 3.16 (s, 0.08H (*exo*)), 3.13-3.10 (m, 1H), 2.02 (d,  $J = 10.0$  Hz, 1H), 1.63 (dd,  $J = 1.5$  Hz, 8.5 Hz, 1H) ppm;  $^{13}\text{C NMR}$  (125 MHz,  $\text{CDCl}_3$ ):  $\delta$  198.5, 193.4, 163.4, 144.9, 139.1, 133.1, 130.8, 130.7, 130.3, 128.6, 127.6, 126.0, 113.8, 55.9, 55.6, 48.8, 48.6, 48.1, 46.0 ppm.

(3-(4-Fluorophenyl)bicyclo[2.2.1]hept-5-en-2-yl)(phenyl)methanone (**3g**)

**Results:** 58% yield, colorless oily liquid, dr = 55:45 (*endo:exo*); **IR (ATR):**  $\nu_{\text{max}}$  3059, 3027, 2986, 1676, 1495, 1454, 1333, 1219, 1016, 834, 746, 700  $\text{cm}^{-1}$ ;  **$^1\text{H-NMR}$  (500 MHz,  $\text{CDCl}_3$ ):**  $\delta$  7.93 (dd,  $J = 1.5$  Hz, 8.5 Hz, 1H (*endo*)), 7.88 (dd,  $J = 1.5$  Hz, 8.5 Hz, 1H (*exo*)), 7.57-7.52 (m, 1H), 7.47-7.39 (m, 2H), 7.24-7.21 (m, 1H), 7.00-6.90 (m, 2H), 6.50-6.44 (m, 1H), 6.15 (dd,  $J = 3.0$  Hz, 5.5 Hz, 0.45H (*exo*)), 5.87 (dd,  $J = 3.0$  Hz, 5.5 Hz, 0.55H (*endo*)), 3.88 (dd,  $J = 3.5$  Hz, 5.0 Hz, 0.45H (*exo*)), 3.84 (dd,  $J = 3.5$  Hz, 5.0 Hz, 0.55H (*endo*)), 3.45 (d,  $J = 4.0$  Hz, 0.55H (*endo*)), 3.38 (dd,  $J = 1.5$  Hz, 5.5 Hz, 0.45H (*exo*)), 3.35 (s, 0.55H (*endo*)), 3.15-3.13 (m, 1H), 3.08 (s, 0.55H (*endo*)), 2.00 (d,  $J = 8.5$  Hz, 0.55H (*endo*)), 1.88 (d,  $J = 9.0$  Hz, 0.45H (*exo*)), 1.66 (dd,  $J = 1.5$  Hz, 10.0 Hz, 0.55H (*endo*)), 1.54 (dd,  $J = 1.5$  Hz, 3.5 Hz, 0.45H (*exo*)) ppm;  $^{13}\text{C NMR}$  (125 MHz,  $\text{CDCl}_3$ ):  $\delta$  201.1, 200.0, 140.4, 139.2, 136.9, 136.8, 136.7, 133.1, 133.0 (d,  $J = 2.5$  Hz), 129.5, 129.4, 128.9, 128.9, 128.7 (d,  $J = 10.0$  Hz), 128.6, 128.4, 115.4, 115.3, 115.0, 114.9, 56.5, 54.9, 49.0, 48.8, 48.7, 48.1, 48.0, 47.0, 45.2 ppm.

(3-(4-Chlorophenyl)bicyclo[2.2.1]hept-5-en-2-yl)(phenyl)methanone (**3h**)

**Results:** 55% yield, yellow oily liquid, dr = 65:35 (*endo:exo*); **IR (ATR):**  $\nu_{\max}$  2958, 2923, 1735, 1678, 1451, 1258, 1013, 793, 731, 695  $\text{cm}^{-1}$ ;  **$^1\text{H-NMR}$  (500 MHz,  $\text{CDCl}_3$ ):**  $\delta$  7.92 (dd,  $J = 1.5$  Hz, 8.5 Hz, 1.30H (*endo*)), 7.88 (dd,  $J = 1.5$  Hz, 8.5 Hz, 0.72H (*exo*)), 7.68- 7.51 (m, 1H), 7.47-7.39 (m, 2H), 7.25-7.18 (m, 3.49H), 7.08 (d,  $J = 8.0$  Hz, 0.70H), 6.50-6.43 (m, 1H), 6.14-6.12 (m, 0.35H (*exo*)), 5.86 (dd,  $J = 3.0$  Hz, 5.5 Hz, 0.65H (*endo*)), 3.88 (dd,  $J = 3.5$  Hz, 5.0 Hz, 0.35H), 3.83 (dd,  $J = 3.0$  Hz, 4.5 Hz, 0.65H (*endo*)), 3.44 (dd,  $J = 1.5$  Hz, 5.0 Hz, 0.65H (*endo*)), 3.37 (dd,  $J = 1.5$  Hz, 5.5 Hz, 0.35H (*exo*)), 3.34 (s, 0.65H), 3.14 (m, 0.70H (*exo*)), 3.09-3.07 (m, 0.65H), 1.96 (d,  $J = 8.5$  Hz, 0.65H (*endo*)), 1.87 (d,  $J = 9.0$  Hz, 0.35H (*exo*)), 1.65 (dd,  $J = 3.5$  Hz, 8.5 Hz 0.65H (*endo*)), 1.54 (dd,  $J = 1.5$  Hz, 8.5 Hz, 0.35H (*exo*)) ppm;  **$^{13}\text{C NMR}$  (125 MHz,  $\text{CDCl}_3$ ):**  $\delta$  200.9, 199.8, 143.3, 142.1, 139.2, 137.2, 136.9, 136.6, 133.1, 133.0, 133.0, 132.0, 131.8, 129.4, 128.9, 128.7, 128.5, 128.4, 128.3, 56.4, 54.6, 49.0, 48.9, 48.7, 48.5, 48.1, 47.9, 47.1, 45.3 ppm.

(3-(4-Bromophenyl)bicyclo[2.2.1]hept-5-en-2-yl)(phenyl)methanone (**3i**)

**Results:** 65% yield, yellow oily liquid, dr = 65:35 (*endo:exo*); **IR (ATR):**  $\nu_{\max}$  3061, 2968, 2927, 1676, 1595, 1448, 1330, 1259, 1214, 1011, 818, 759, 724, 692  $\text{cm}^{-1}$ ;  **$^1\text{H-NMR}$  (500 MHz,  $\text{CDCl}_3$ ):**  $\delta$  7.93 (dd,  $J = 1.0$  Hz, 8.0 Hz, 1.33H (*endo*)), 7.89 (dd,  $J = 1.5$  Hz, 8.5 Hz, 0.72H (*exo*)), 7.57-7.51 (m, 1H), 7.47-7.33 (m, 4H), 7.14 (dd,  $J = 1.0$  Hz, 6.5 Hz 1.30H), 7.03 (dd,  $J = 2.5$  Hz, 9.5 Hz, 0.70H), 6.48 (dd,  $J = 3.5$  Hz, 5.5 Hz, 0.35H (*exo*)), 6.45 (dd,  $J = 3.5$  Hz, 6.0 Hz, 0.65H (*endo*)), 6.13 (dd,  $J = 3.0$  Hz, 5.5 Hz, 0.35H (*exo*)), 5.86 (dd,  $J = 3.0$  Hz, 6.0 Hz, 0.65H (*endo*)), 3.87 (dd,  $J = 3.5$  Hz, 5.0 Hz, 0.35H (*exo*)), 3.83 (dd,  $J = 3.5$  Hz, 5.0 Hz, 0.65H (*endo*)), 3.44 (d,  $J = 3.5$  Hz, 0.65H (*endo*)), 3.38 (dd,  $J = 1.5$  Hz, 5.5 Hz, 0.35H (*exo*)), 3.35 (s, 0.70H (*exo*)), 3.14 (dd,  $J = 1.5$  Hz, 3.0 Hz, 0.70H (*exo*)), 3.08 (d,  $J = 1.5$  Hz, 0.65H (*endo*)), 1.97 (d,  $J = 8.5$  Hz, 0.65H (*endo*)), 1.88 (d,  $J = 8.5$  Hz, 0.35H (*exo*)), 1.66 (dq,  $J = 1.5$  Hz, 8.5 Hz, 0.65H (*endo*)), 1.54 (dq,  $J = 1.5$  Hz, 8.5 Hz, 0.35H (*exo*)) ppm;  **$^{13}\text{C NMR}$  (125 MHz,  $\text{CDCl}_3$ ):**  $\delta$  200.7, 199.7, 143.7, 142.6, 139.1, 137.1, 136.8, 136.5, 133.0, 132.9, 131.6, 131.2, 129.7, 129.2, 128.6, 128.5, 128.3, 120.0, 119.7, 56.3, 54.5, 48.9, 48.8, 48.7, 48.3, 48.0, 47.8, 47.1, 45.3 ppm.

Phenyl-(3-(*p*-tolyl)bicyclo[2.2.1]hept-5-en-2-yl)methanone (**3j**)

**Results:** 58% yield, yellow oily liquid dr = 55:45 (*endo:exo*); **IR (ATR):**  $\nu_{\max}$  3058, 2970, 1676, 1596, 1448, 1329, 1209, 1016, 804, 760, 791, 664  $\text{cm}^{-1}$ ;  **$^1\text{H-NMR}$  (500 MHz,  $\text{CDCl}_3$ ):**  $\delta$  7.94 (dd,  $J = 1.0$  Hz, 8.0 Hz, 1.10H (*endo*)), 7.90 (dd,  $J = 1.0$  Hz, 8.0 Hz, 0.90H (*exo*)), 7.57-7.49 (m, 1H), 7.48-7.37 (m, 2H), 7.18 (d,  $J = 5.0$  Hz, 1H), 7.11 (d,  $J = 5.0$  Hz, 1H), 7.06 (s, 2H), 6.50 - 6.45 (m, 1H), 6.18 (dd,  $J = 3.0$  Hz, 5.5 Hz, 0.45H (*exo*)), 5.88 (dd,  $J = 2.5$  Hz, 8.5 Hz, 0.55H (*endo*)), 3.90 (dd,  $J = 3.5$  Hz, 5.0 Hz, 0.55H (*endo*)), 3.88 (dd,  $J = 3.0$  Hz, 5.0 Hz, 0.45H (*exo*)), 3.44 (d,  $J = 4.0$  Hz, 0.55H (*endo*)), 3.42 (dd,  $J = 1.0$  Hz, 5.0 Hz, 0.45H (*exo*)), 3.34 (s, 0.55H (*endo*)), 3.16 (s, 0.45H (*exo*)), 3.13 (s, 0.45H (*exo*)), 3.09 (d,  $J = 1.5$  Hz, 0.55H (*endo*)), 2.33 (s, 2H,  $\text{CH}_3$  (*endo*)), 2.31 (s, 1H,  $\text{CH}_3$  (*exo*)), 2.03 (d,  $J = 8.5$  Hz, 0.55H (*endo*)), 1.90 (d,  $J = 8.5$  Hz, 0.45H (*exo*)), 1.64 (dd,  $J = 1.5$  Hz, 8.5 Hz, 0.45H (*exo*)), 1.53 (dd,  $J = 1.5$  Hz, 8.5 Hz, 0.55H (*endo*)) ppm;  **$^{13}\text{C NMR}$  (125 MHz,  $\text{CDCl}_3$ ):**  $\delta$  201.3, 200.1, 141.6, 140.4, 139.2, 137.3, 137.0, 136.9, 136.5, 135.7, 135.5, 132.9, 132.8, 132.7, 129.2, 128.8, 128.6, 128.5, 128.4, 127.9, 127.4, 56.2, 54.5, 48.9, 48.8, 48.7, 48.6, 48.0, 47.8, 47.4, 45.5, 21.0, 20.9 ppm.

(3-(4-Nitrophenyl)bicyclo[2.2.1]hept-5-en-2-yl)(phenyl)methanone (**3k**)

**Results:** 79% yield, yellow oily liquid, dr = >99:1 (*endo:exo*); **IR (ATR):**  $\nu_{\max}$  3059, 2922, 2853, 1667, 1598, 1449, 1214, 1014, 843, 724, 693  $\text{cm}^{-1}$ ;  **$^1\text{H-NMR}$  (500 MHz,  $\text{CDCl}_3$ ):**  $\delta$  8.08 (dt,  $J = 2.5$  Hz, 4.0 Hz, 2H), 7.92 (dd,  $J = 0.5$  Hz, 8.0 Hz, 2H), 7.58- 7.53 (m, 1H), 7.46-7.40 (m, 2H), 7.31 (d,  $J = 2.0$  Hz, 8.5 Hz), 6.54 (dd,  $J = 3.0$  Hz, 5.5 Hz, 1H), 6.13 (dd,  $J = 3.0$  Hz, 6.0 Hz, 1H), 4.10 (dd,  $J = 3.5$  Hz, 5.0 Hz, 1H), 3.45 (dd,  $J = 1.0$  Hz, 5.0 Hz, 1H), 3.22 (s, 1H), 3.18 (s, 1H), 1.89 (d,  $J = 8.5$  Hz, 1H), 1.58 (dd,  $J = 1.5$  Hz, 9.0 Hz, 1H) ppm;  **$^{13}\text{C NMR}$  (125 MHz,  $\text{CDCl}_3$ ):**  $\delta$  199.2, 152.9, 146.4, 139.1, 136.9, 133.2, 133.2, 128.8, 128.5, 128.4, 128.3, 123.9, 56.7, 48.9, 48.2, 48.1, 45.7 ppm.

4-(3-Benzoylbicyclo[2.2.1]hept-5-en-2-yl)benzotrile (**3l**)

**Results:** 75% yield, yellow oily liquid, dr = > 99:1 (*endo:exo*); **IR (ATR):**  $\nu_{\max}$  3061, 2967, 2226, 1675, 1448, 1329, 1209, 1016, 756, 694, 660  $\text{cm}^{-1}$ ;  **$^1\text{H-NMR}$  (500 MHz,  $\text{CDCl}_3$ ):**  $\delta$  7.90 (dd,  $J = 1.0$  Hz, 8.5 Hz, 2H), 7.55 (tt,  $J = 7.0$  Hz, 14.5 Hz, 1H), 7.51(dt,  $J = 2.0$  Hz, 6.5 Hz, 2H) 7.46-7.41 (m, 2H), 7.27-7.24 (m, 2H), 6.51 (dd,  $J = 3.0$  Hz, 5.5 Hz, 1H), 6.12 (dd,  $J = 3.0$  Hz, 5.5 Hz, 1H), 4.04 (dd,  $J = 3.5$  Hz, 5.0 Hz, 1H), 3.41 (dd,

$J = 1.0$  Hz,  $5.0$  Hz,  $1$ H),  $3.20$  (s,  $1$ H),  $3.17$  (s,  $1$ H),  $1.88$  (d,  $J = 8.5$  Hz,  $1$ H),  $1.56$  (dd,  $J = 2.0$  Hz,  $9.0$  Hz,  $1$ H) ppm;  $^{13}\text{C}$  NMR (**125 MHz**,  $\text{CDCl}_3$ ):  $\delta$  200.0, 149.3, 137.1, 136.5, 136.2, 133.2, 131.9, 128.6, 128.4, 118.9, 110.0, 54.4, 49.1, 48.6, 47.7, 47.5 ppm.

(4-Fluorophenyl)(3-(*p*-tolyl)bicyclo[2.2.1]hept-5-en-2-yl)methanone (**3m**)

**Results:** 70% yield, yellow oily liquid, dr = 65:35 (*endo:exo*); **IR (ATR):**  $\nu_{\text{max}}$  3063, 2966, 2926, 1740, 1678, 1451, 1368, 1221, 1018, 802, 714, 677  $\text{cm}^{-1}$ ;  **$^1\text{H}$ -NMR (500 MHz,  $\text{CDCl}_3$ ):**  $\delta$  7.97-7.93 (m,  $1.33$ H (*endo*)), 7.90-7.86 (m,  $0.71$ H (*exo*)), 7.17-7.02 (m,  $6$ H), 6.48-6.43 (m,  $1$ H), 6.16 (dd,  $J = 2.5$  Hz,  $5.5$  Hz,  $0.35$ H (*exo*)), 5.87 (dd,  $J = 3.0$  Hz,  $6.0$  Hz,  $0.65$ H (*endo*)), 3.83 (dd,  $J = 3.5$  Hz,  $5.0$  Hz,  $0.65$ H (*endo*)), 3.78 (dd,  $J = 3.5$  Hz,  $5.5$  Hz,  $0.35$ H (*exo*)), 3.38 (d,  $J = 4.0$  Hz,  $0.65$ H (*endo*)), 3.34 (dd,  $J = 1.0$  Hz,  $5.0$  Hz,  $0.35$ H (*exo*)), 3.30 (s,  $0.35$ H (*exo*)), 3.15-3.10 (m,  $0.70$ H (*exo*)), 3.09- 3.06 (m,  $0.65$ H (*endo*)), 2.31 (s,  $2$ H  $\text{CH}_3$  (*endo*)), 2.30 (s,  $1$ H  $\text{CH}_3$  (*exo*)), 2.02 (d,  $J = 8.5$  Hz,  $0.65$ H (*endo*)), 1.88 (d,  $J = 8.5$  Hz,  $0.35$ H (*exo*)), 1.63 (dq,  $J = 1.5$  Hz,  $3.5$  Hz,  $0.65$ H (*endo*)), 1.53 (m,  $0.35$ H (*exo*)) ppm;  **$^{13}\text{C}$  NMR (125 MHz,  $\text{CDCl}_3$ ):**  $\delta$  199.8, 198.5, 139.2, 136.9, 136.4, 135.6, 133.6 (d,  $J = 3.75$  Hz), 133.3 (d,  $J = 2.5$  Hz), 132.8, 131.1 (d,  $J = 8.75$  Hz), 130.9 (d,  $J = 8.75$  Hz), 129.2, 128.8, 127.8, 127.3, 115.7, 115.5 (d,  $J = 21.2$  Hz), 115.5 (d,  $J = 21.2$  Hz), 115.4, 56.1, 54.5, 48.8 (d,  $J = 42.5$  Hz), 48.7 (d,  $J = 38.75$  Hz), 48.0, 47.9, 47.6, 45.7, 20.9 ppm.

(4-Chlorophenyl)(3-(*p*-tolyl)bicyclo[2.2.1]hept-5-en-2-yl)methanone (**3n**)

**Results:** 70% yield, yellow oily liquid, dr = 72:28 (*endo:exo*); **IR (ATR):**  $\nu_{\text{max}}$  3059, 2966, 2926, 1734, 1678, 1588, 1369, 1214, 1013, 803, 716, 676  $\text{cm}^{-1}$ ;  **$^1\text{H}$ -NMR (500 MHz,  $\text{CDCl}_3$ ):**  $\delta$  7.85 (dt,  $J = 2.5$  Hz,  $9.0$  Hz,  $1.46$ H (*endo*)), 7.78 (dt,  $J = 2.5$  Hz,  $9.5$  Hz,  $0.57$ H (*exo*)), 7.39 (dt,  $J = 2.5$  Hz,  $9.5$  Hz,  $1.41$ H (*endo*)), 7.33 (dt,  $J = 2.5$  Hz,  $9.5$  Hz,  $0.56$ H (*exo*)), 7.19- 7.09 (m,  $3$ H), 7.07 - 7.00 (m,  $1$ H), 6.45 (m,  $1$ H), 6.16 (dd,  $J = 3.0$  Hz,  $5.5$  Hz,  $0.28$ H (*exo*)) 5.86 (dd,  $J = 3.0$  Hz,  $6.0$  Hz,  $0.72$ H (*endo*)), 3.82 (dd,  $J = 3.5$  Hz,  $5.0$  Hz,  $0.72$ H (*endo*)), 3.76 (dd,  $J = 3.0$  Hz,  $5.5$  Hz,  $0.28$ H (*exo*)), 3.37 (d,  $J = 4.0$  Hz,  $0.72$ H (*endo*)), 3.32 (dd,  $J = 1.5$  Hz,  $5.5$  Hz,  $0.28$ H (*exo*)), 3.30 (s,  $0.72$ H (*endo*)), 3.14-3.10 (m,  $0.56$ H), 3.08-3.06 (m,  $0.72$ H (*endo*)), 2.32 (s,  $2.23$ H,  $\text{CH}_3$  (*endo*)), 2.30 (s,  $0.89$ H,  $\text{CH}_3$  (*exo*)), 2.01 (d,  $J = 8.5$  Hz,  $0.72$ H (*endo*)), 1.87 (d,  $J = 9.0$  Hz,  $0.28$ H (*exo*)), 1.63 (dd,  $J = 3.5$  Hz,  $10.5$  Hz,  $0.72$ H (*endo*)), 1.54-1.52 (m,  $0.28$ H (*exo*)) ppm;  **$^{13}\text{C}$  NMR (125 MHz,  $\text{CDCl}_3$ ):**  $\delta$  200.8, 199.5, 141.9, 140.7, 139.8,



139.8, 139.7, 137.4, 136.9, 136.4, 136.2, 136.0, 135.8, 135.8, 133.4, 130.4, 130.3, 129.8, 129.4, 129.3, 129.3, 128.4, 127.9, 56.7, 55.1, 49.5, 49.3, 49.1, 48.9, 48.5, 48.4, 48.2, 46.2, 21.4 ppm.

#### 4-Bromophenyl-(3-(*p*-tolyl)bicyclo[2.2.1]hept-5-en-2-yl)methanone (**3o**)

**Results:** 65% yield, yellow oily liquid, dr = 55:45 (*endo:exo*); **IR (ATR):**  $\nu_{\max}$  2952, 2921, 2852, 1740, 1584, 1458, 1373, 1214, 1023, 804, 720, 684  $\text{cm}^{-1}$ ;  **$^1\text{H-NMR}$  (500 MHz,  $\text{CDCl}_3$ ):**  $\delta$  7.77 (dt,  $J = 2.0$  Hz, 9.0 Hz, 1.21H (*endo*)), 7.70 (dt,  $J = 2.0$  Hz, 9.0 Hz, 0.92H (*exo*)), 7.56 (dt,  $J = 2.5$  Hz, 9.5 Hz, 1.18H (*endo*)), 7.50 (dt,  $J = 2.0$  Hz, 9.0 Hz, 0.94H (*exo*)), 7.17-7.09 (m, 2H), 7.06- 7.01 (m, 2H), 6.47-6.42 (m, 1H), 6.16 (dd,  $J = 2.5$  Hz, 5.5 Hz, 0.45H (*exo*)), 5.86 (dd,  $J = 3.0$  Hz, 6.0 Hz, 0.55H (*endo*)), 3.81 (dd,  $J = 3.5$  Hz, 5.0 Hz, 0.55H), 3.75 (dd,  $J = 3.5$  Hz, 5.5 Hz, 0.45H), 3.37 (d,  $J = 3.5$  Hz, 0.55H (*endo*)), 3.31 (dd,  $J = 1.5$  Hz, 5.5 Hz, 0.45H (*exo*)), 3.29 (s, 0.55H (*endo*)), 3.11 (d,  $J = 8.0$  Hz, 0.90H (*exo*)), 3.06 (s, 0.55H (*endo*)), 2.31 (s, 1.70H,  $\text{CH}_3$  (*endo*)), 2.30 (s, 1.35H,  $\text{CH}_3$  (*exo*)), 2.01 (d,  $J = 8.5$  Hz, 0.55H (*endo*)), 1.86 (d,  $J = 8.5$  Hz, 0.45H (*exo*)), 1.63(dd,  $J = 3.5$  Hz, 10.5 Hz, 0.55H), 1.53(dd,  $J = 1.5$  Hz, 3.0 Hz, 0.45H) ppm;  **$^{13}\text{C NMR}$  (125 MHz,  $\text{CDCl}_3$ ):**  $\delta$  200.6, 199.3, 141.4, 140.2, 139.4, 137.0, 136.5, 135.8, 132.9, 131.9, 131.8, 130.1, 130.0, 129.4, 129.0, 129.2, 128.1, 128.0, 127.4, 56.3, 54.7, 49.1, 48.9, 48.6, 48.5, 48.1, 48.0, 47.8, 45.8 21.0 ppm.

#### 4-Methoxyphenyl(3-(*p*-tolyl)bicyclo[2.2.1]hept-5-en-2-yl)methanone (**3p**)

**Results:** 71% yield, yellow oily liquid, dr = 45:55 (*endo:exo*); **IR (ATR):**  $\nu_{\max}$  3011, 2964, 2924, 1738, 1671, 1599, 1453, 1369, 1220, 1021, 838, 714, 680  $\text{cm}^{-1}$ ;  **$^1\text{H-NMR}$  (500 MHz,  $\text{CDCl}_3$ ):**  $\delta$  7.92 (dt,  $J = 2.0$ , 10.0 Hz, 0.92H (*endo*)), 7.86 (dt,  $J = 2.5$  Hz, 9.5 Hz, 1.12H (*exo*)), 7.19-7.08 (m, 2H), 7.04 (s, 2H), 6.90 (dd,  $J = 2.0$  Hz, 7.0 Hz, 0.96H (*endo*)), 6.86 (dd,  $J = 2.5$  Hz, 7.0 Hz, 1.16H (*exo*)), 6.47-6.43 (m, 1H), 6.16 (dd,  $J = 3.0$  Hz, 5.5 Hz, 0.55H (*exo*)), 5.88 (dd,  $J = 2.5$  Hz, 5.5 Hz, 0.45H (*endo*)), 3.86 (s, 1.20H,  $\text{OCH}_3$  (*endo*)), 3.84 (s, 2.20H,  $\text{OCH}_3$  (*exo*)) 3.42 (d,  $J = 4.5$  Hz, 0.45H (*endo*)), 3.35 (dd,  $J = 1.5$  Hz, 5.0 Hz, 0.55H (*exo*)), 3.31 (s, 0.45H (*endo*)), 3.13 (s, 0.55H (*exo*)), 3.07 (d,  $J = 1.5$  Hz, 1H), 2.31 (s, 1.30H,  $\text{CH}_3$  (*endo*)), 2.29 (s, 1.70H,  $\text{CH}_3$  (*exo*)), 2.01 (d,  $J = 8.5$  Hz, 0.45H (*endo*)), 1.90 (d,  $J = 8.5$  Hz, 0.55H (*exo*)), 1.62 (dd,  $J = 3.0$  Hz, 8.5 Hz, 1H), 1.52 (dd,  $J = 3.5$  Hz, 9.0 Hz, 1H) ppm;  **$^{13}\text{C NMR}$  (125 MHz,  $\text{CDCl}_3$ ):**  $\delta$  199.9, 198.6, 163.4, 141.9, 140.7, 139.1, 136.9, 136.6, 135.7, 135.5,

133.1, 130.8, 130.7, 130.3, 130.1, 129.3, 128.9, 127.5, 113.7, 112.5, 113.8, 113.7, 55.9, 55.5, 54.2, 49.0, 48.8, 48.7, 48.1, 48.0, 47.5, 45.6, 21.1, 21.0 ppm.

4-Chlorophenyl(5-methyl-1,2,3,6-tetrahydro-[1,1'-biphenyl]-2-yl)methanone (**5c** and **5c'**)

**Results:** 56% yield, yellow oily liquid, *Regio* isomers = 70:30 (*para:meta*); **IR (ATR):**  $\nu_{\max}$  3063, 3026, 2952, 2923, 1740, 1679, 1588, 1450, 1370, 1227, 1011, 839, 797, 699  $\text{cm}^{-1}$ ; **<sup>1</sup>H-NMR (500 MHz, CDCl<sub>3</sub>):**  $\delta$  7.72 (dd,  $J = 2.0$  Hz, 8.5 Hz, 2H), 7.32 (dd,  $J = 2.0$  Hz, 6.5 Hz, 2H), 7.17-7.13 (m, 4H), 7.08-7.04 (m, 1H), 5.57-5.53 (m, 0.30H), 5.52-5.47 (m, 0.70H) 3.97- 3.92 ( m, 0.30H), 3.89-3.82 (m, 0.70H), 3.34-3.26 (m, 0.70H), 3.24-3.17 (m, 0.30H), 2.35-2.27 (m, 4H), 1.73 (s, 3H) ppm; **<sup>13</sup>C NMR (125 MHz, CDCl<sub>3</sub>):**  $\delta$  202.7, 202.6, 144.4, 144.2, 139.3, 139.2, 135.7, 134.2, 129.4, 128.8, 128.5, 128.4, 127.6, 127.5, 126.4, 120.9, 119.1, 47.2, 46.7, 42.9, 42.6, 38.8, 35.1, 34.0, 30.8, 29.7, 23.2 ppm.

4-Bromophenyl(5-methyl-1,2,3,6-tetrahydro-[1,1'-biphenyl]-2-yl)methanone (**5d** and **5d'**)

**Results:** 58% yield, yellow oily liquid, *Regio* isomers = 70:30 (*para:meta*); **IR (ATR):**  $\nu_{\max}$  3063, 2923, 2853, 1734, 1584, 1451, 1228, 1007, 837, 742, 679  $\text{cm}^{-1}$ ; **<sup>1</sup>H-NMR (500 MHz, CDCl<sub>3</sub>):**  $\delta$  7.64 (dd,  $J = 2.0$  Hz, 7.0 Hz, 2H), 7.49 (dd,  $J = 2.0$  Hz, 7.0 Hz, 2H), 7.17-7.14 (m, 4H), 7.09-7.04 (m, 1H), 5.57-5.53 (m, 0.30H), 5.52-5.45 (m, 0.70H), 3.97-3.91 (m, 0.30H), 3.88-3.82 (m, 0.70H), 3.33-3.26 (m, 0.70H), 3.24-3.16 (m, 0.30H), 2.37-2.17 (m, 4H), 1.73(s, 3H) ppm; **<sup>13</sup>C NMR (125 MHz, CDCl<sub>3</sub>):**  $\delta$  202.8, 144.4, 136.1, 134.2, 131.8, 129.6, 128.5, 128.4, 127.9, 127.5, 127.4, 126.4, 121.0, 119.1, 47.2, 46.7, 42.9, 42.6, 38.8, 38.2, 35.1, 34.0, 30.8, 29.7, 29.4, 23.2 ppm.

## 2. REFERENCES

1. J. Li, J. Zhang, M. Li, C. Zhang, Y. Yuanb and R. Liu, *Chem. Commun.*, 2019, **55**, 2348. DOI: 10.1039/c8cc09369e
2. Y. Zhang, J. Su, W. Niu and Y. Li, *Chem. Asian J.*, 2019, **14**, 1477. DOI: 10.1002/asia.201900170

Mar 24 17:52:02  
 1H-Scan CDCl3-2D-Spectra  
 7.914 7.902 7.888 7.885 7.852 7.530 7.527 7.524 7.519 7.454 7.451 7.438 7.423 7.412 7.396 7.381 7.301 7.296 7.291 7.285 7.260 7.238 7.224 7.202 7.190 7.186 7.185 7.171 7.168 7.153 7.153 6.479 6.473 6.469 6.462 5.887 5.881 5.875 5.870 3.924 3.917 3.914 3.914 3.907 3.488 3.485 3.478 3.475 3.347 3.133 3.130 3.126 2.027 1.895 1.663 1.660 1.646 1.643

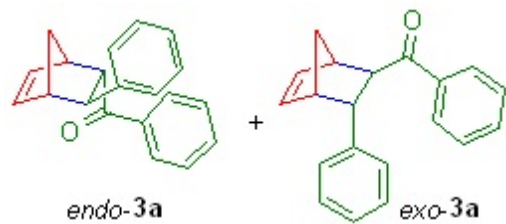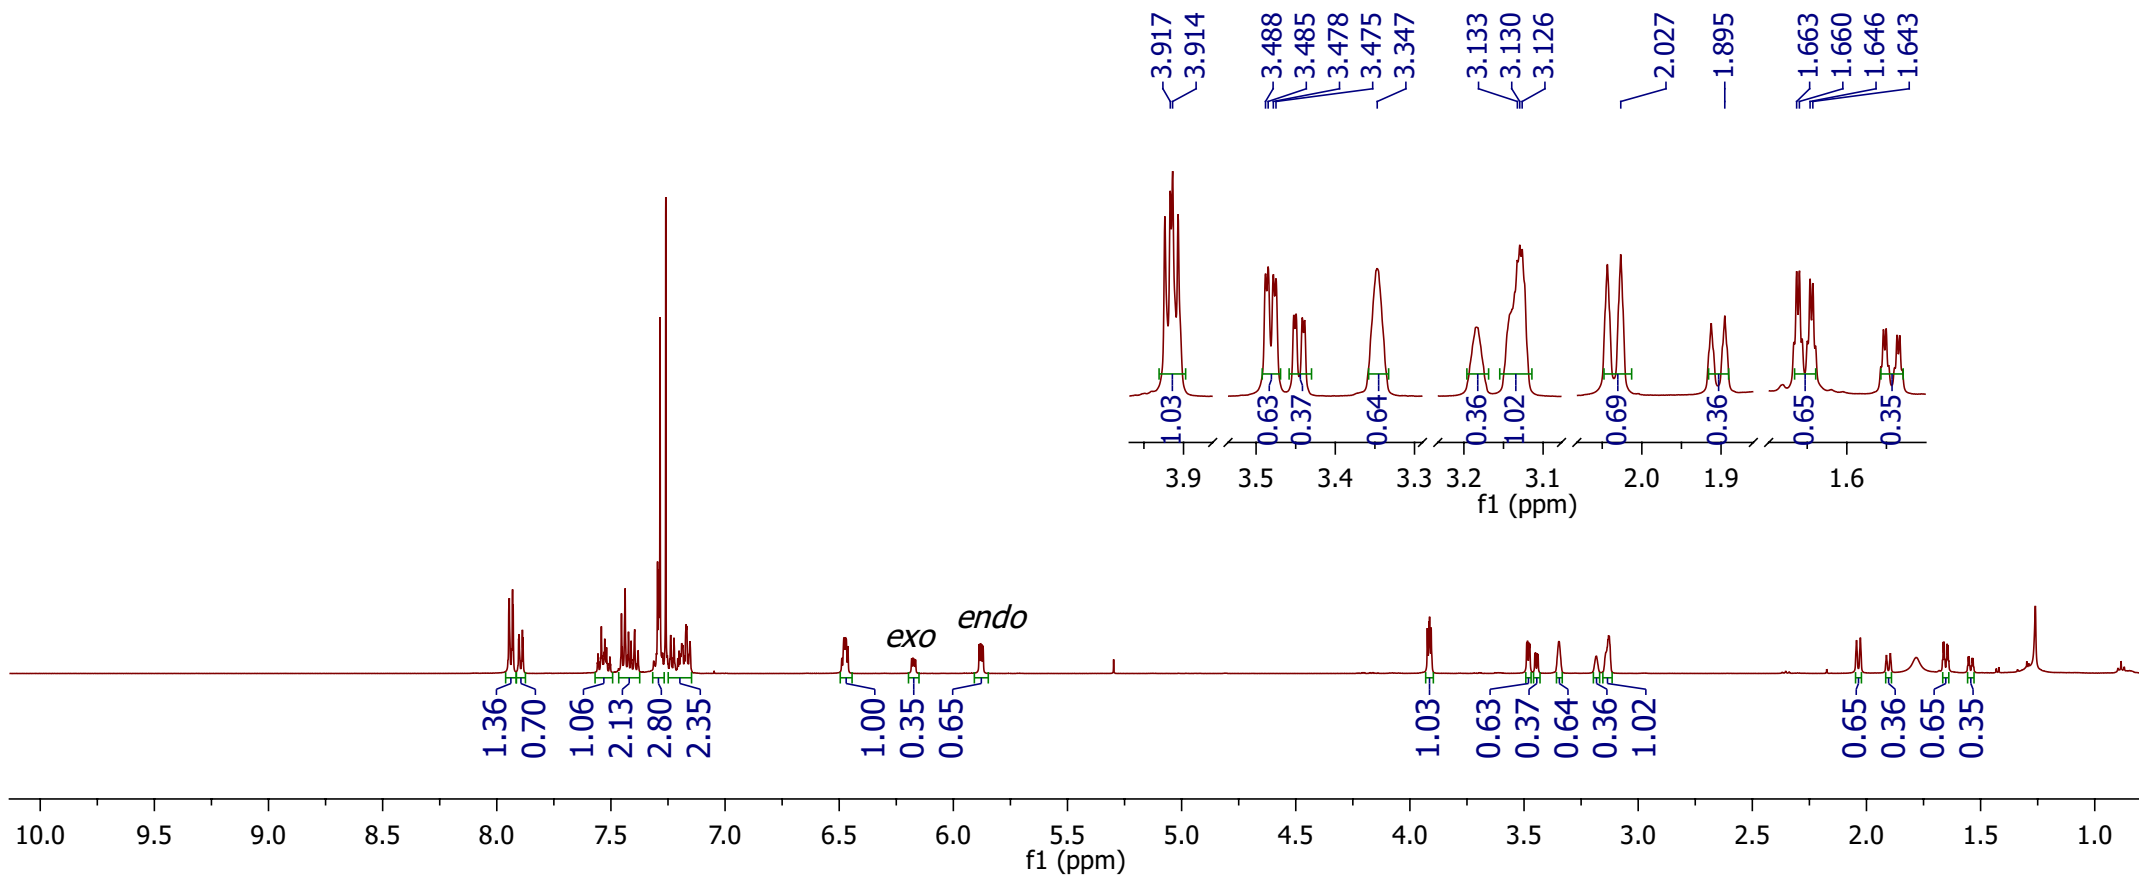

new finalised NMRs  
DT-125  
C13CPD CDCl3 {D:\Spectra} nmr 6

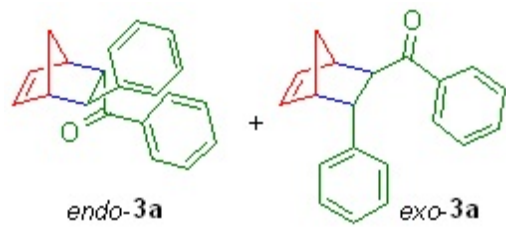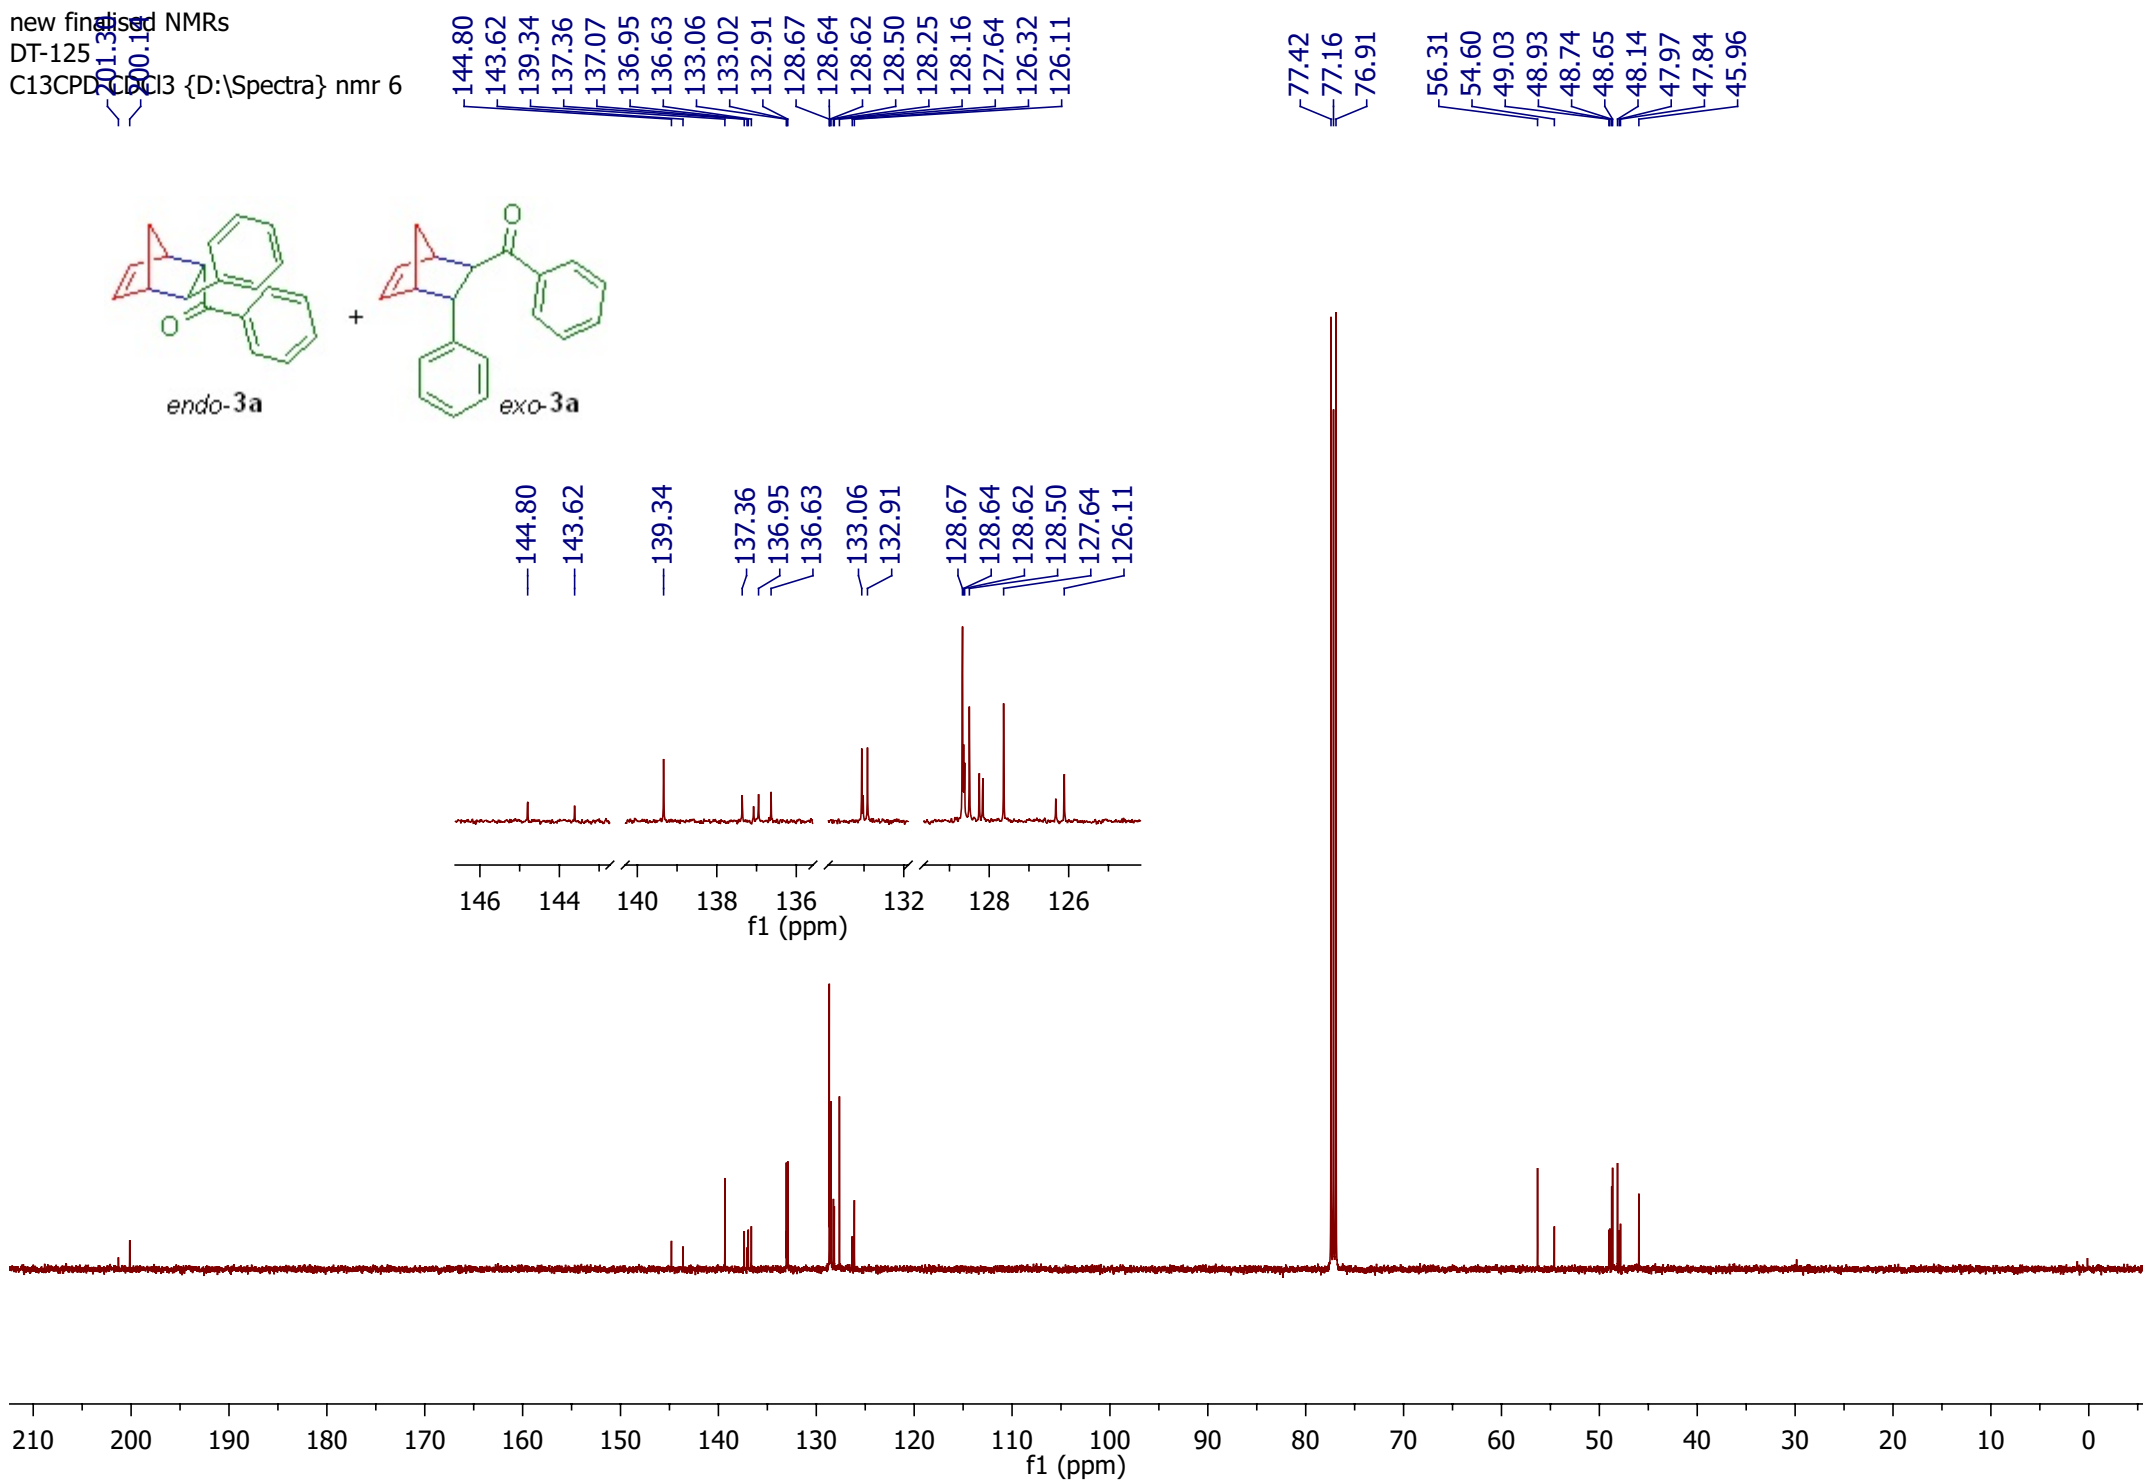

Apr 26 2022  
 D:\Spectra\hmr50  
 1H scan CDCl3  
 8.102  
 8.064  
 8.053  
 8.047  
 8.036  
 7.475  
 7.459  
 7.444  
 7.438  
 7.421  
 7.406  
 7.391  
 7.371  
 7.357  
 7.344  
 7.320  
 7.306  
 7.277  
 7.260  
 7.243  
 7.222  
 7.205  
 7.187  
 6.638  
 6.632  
 6.628  
 6.621  
 6.343  
 6.337  
 6.332  
 6.054  
 6.049  
 6.043  
 6.038  
 4.032  
 4.025  
 4.022  
 4.015  
 4.003  
 3.993  
 3.986  
 3.609  
 3.601  
 3.542  
 3.533  
 3.486  
 3.329  
 3.295  
 3.279  
 2.203  
 2.186  
 2.060  
 2.042  
 1.831  
 1.828  
 1.814  
 1.811  
 1.726  
 1.708

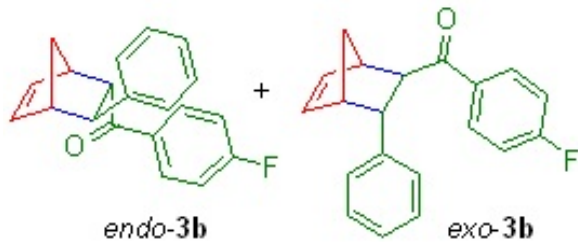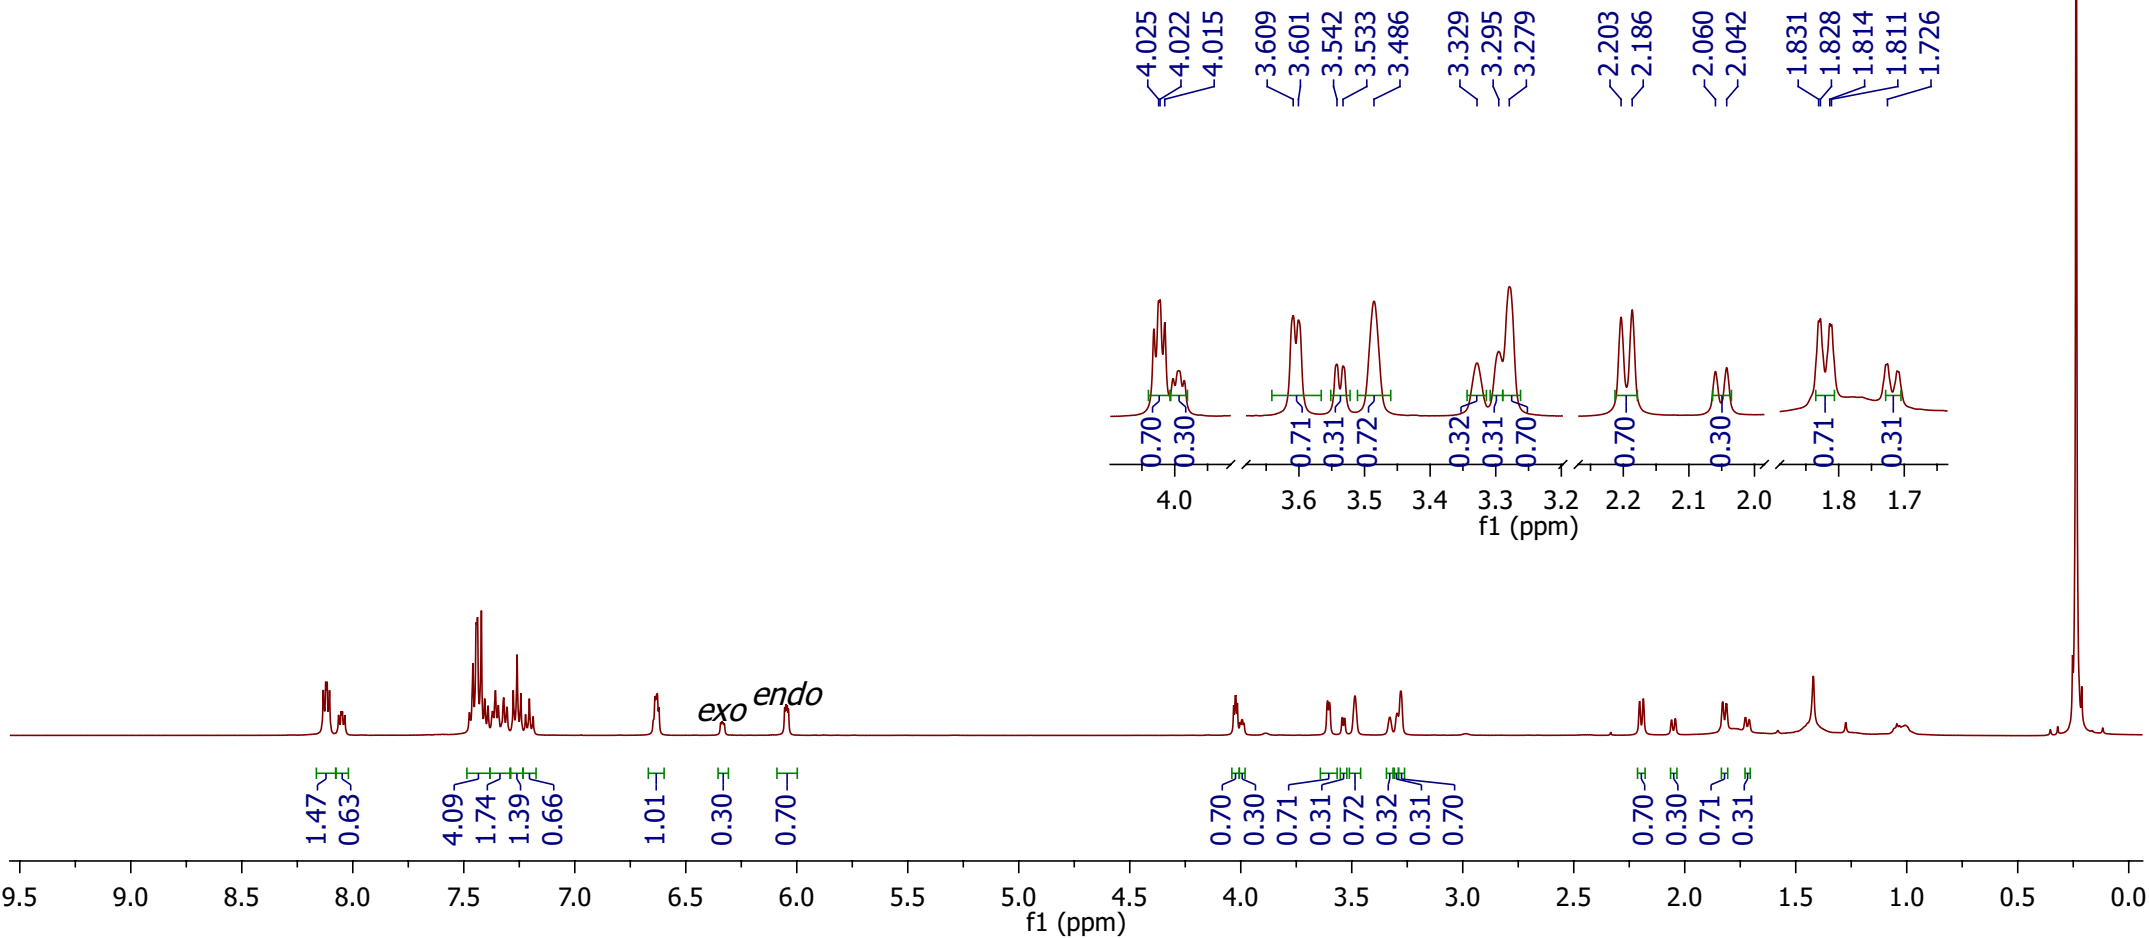

Apr27-2022

DT-49

C13CPD, CDCl3 {D:\Spectra} nmr

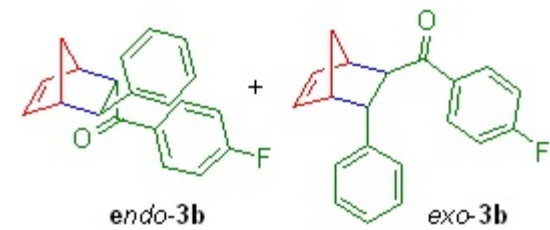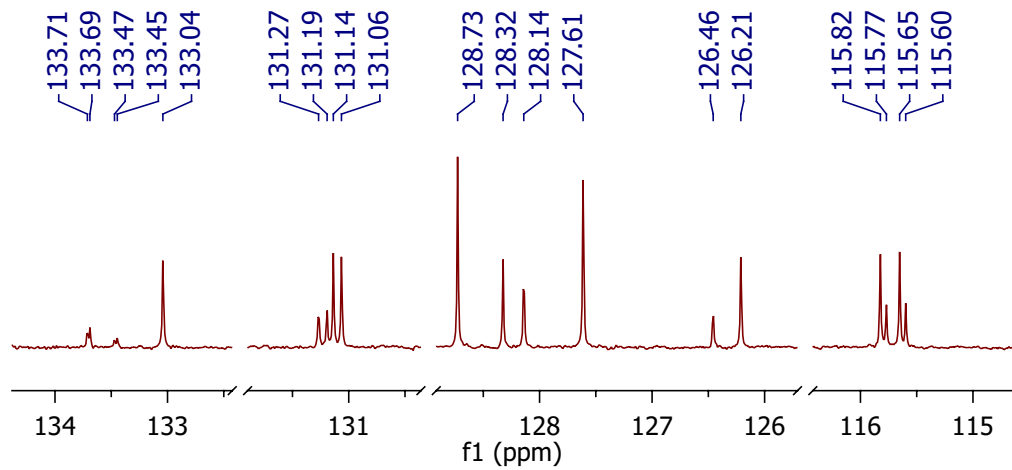

166.79  
166.72  
164.76  
164.70  
139.36  
137.00  
136.60  
133.04  
131.14  
131.06  
128.73  
128.32  
128.14  
127.61  
126.21  
115.82  
115.77  
115.65  
115.60

77.41  
77.16  
76.91

56.26  
54.62  
49.07  
48.80  
48.72  
48.67  
48.16  
48.12  
46.19

—1.17

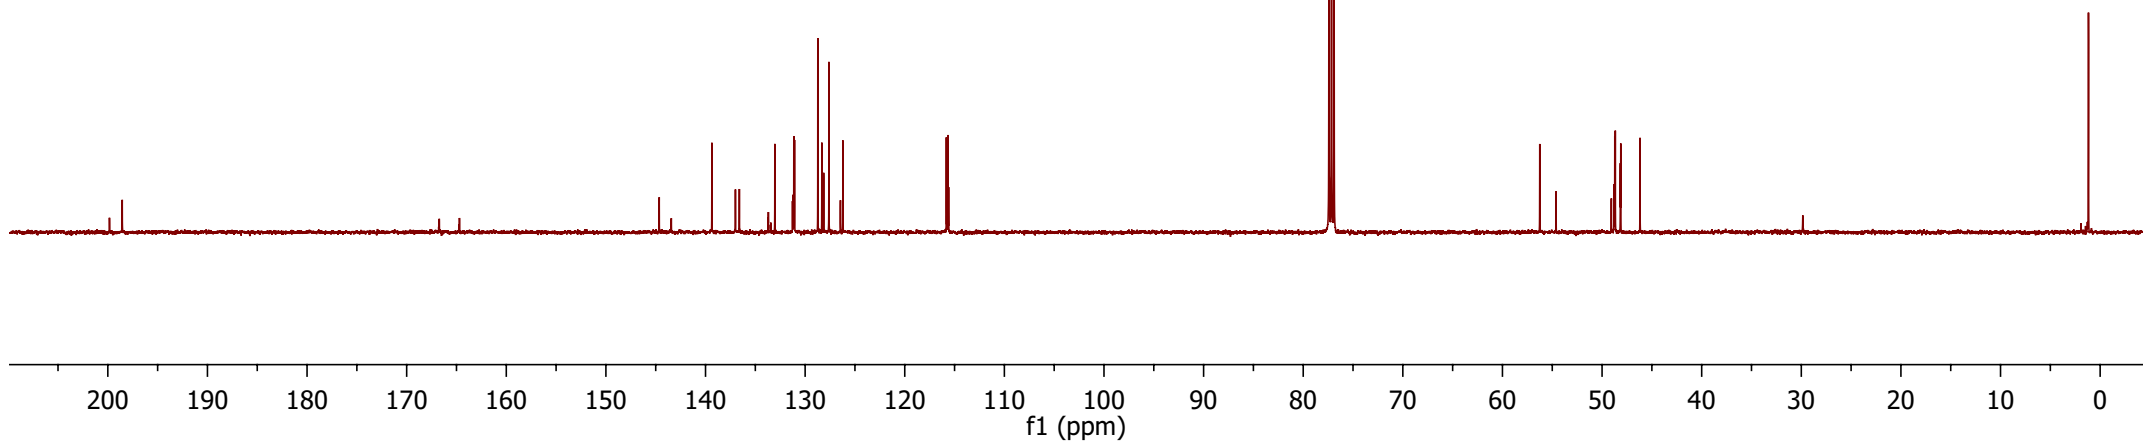

May05-2022

DT-52 4-CL

1H\_8scan CDCl3 {D:\Spectra} nmr 40

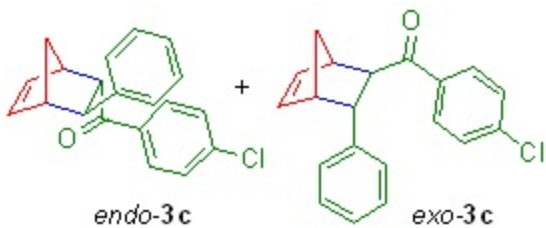

7.859, 7.842, 7.790, 7.773, 7.395, 7.378, 7.271, 7.262, 7.260, 6.453, 6.450, 6.443, 6.164, 6.159, 6.153, 6.148, 5.872, 5.867, 5.861, 5.856, 3.848, 3.841, 3.838, 3.831, 3.815, 3.807, 3.805, 3.429, 3.421, 3.356, 3.302, 3.118, 3.102, 2.026, 2.009, 1.878, 1.861, 1.654, 1.652, 1.637, 1.634, 1.555, 1.552, 1.538, 1.535

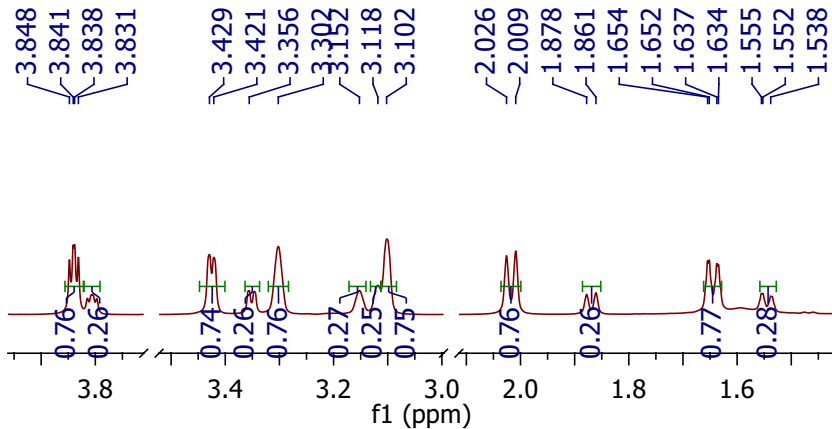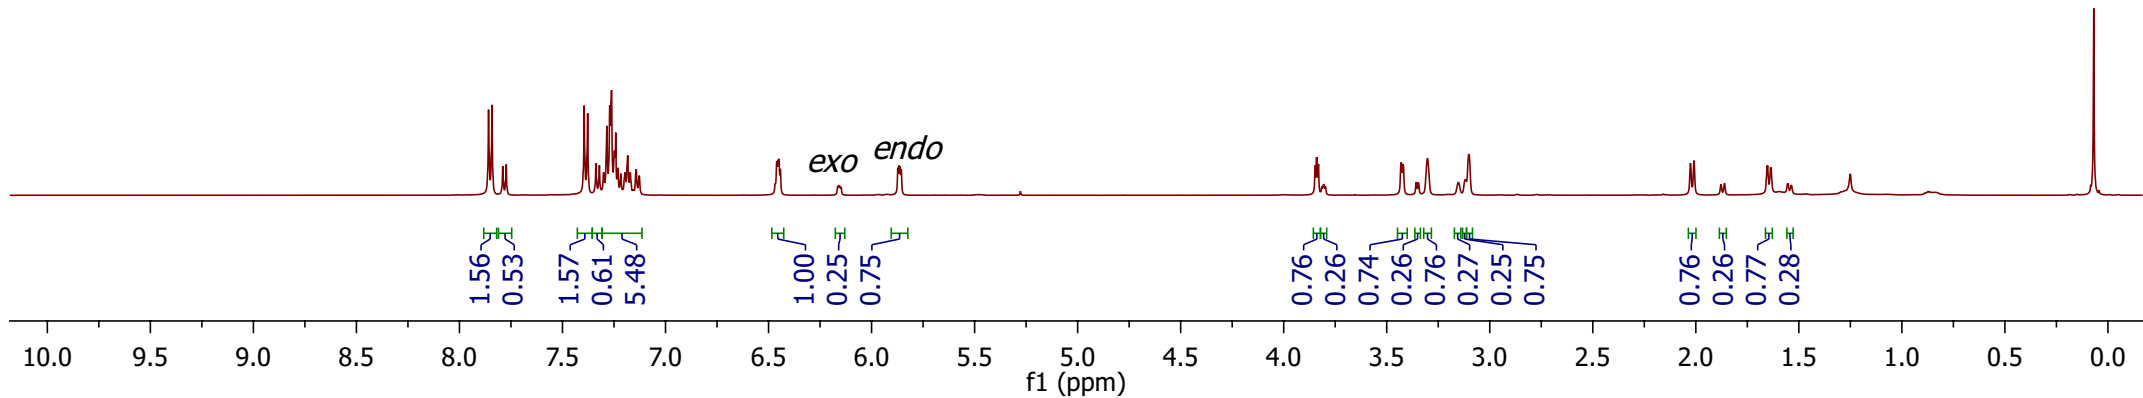

May05-2022  
DT-52 4-CL  
C13CPD CDCI3 {D:\Spectra}

100.65  
77.38

144.98  
143.76  
139.89  
139.83  
139.77  
137.42  
137.00  
136.03  
135.76  
133.43  
130.46  
130.35  
129.40  
129.34  
129.16  
128.76  
128.55  
128.02  
126.91  
126.66

77.85  
77.59  
77.34

56.76  
55.08  
49.53  
49.15  
49.05  
48.59  
48.52  
46.58

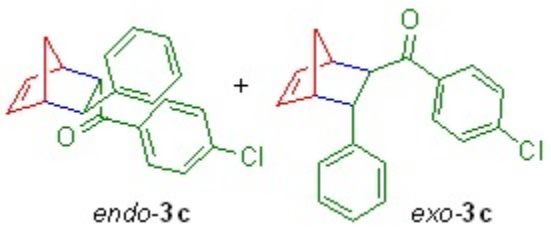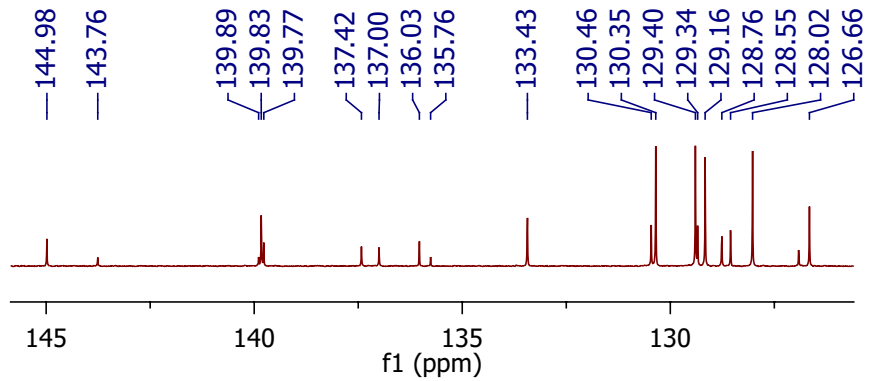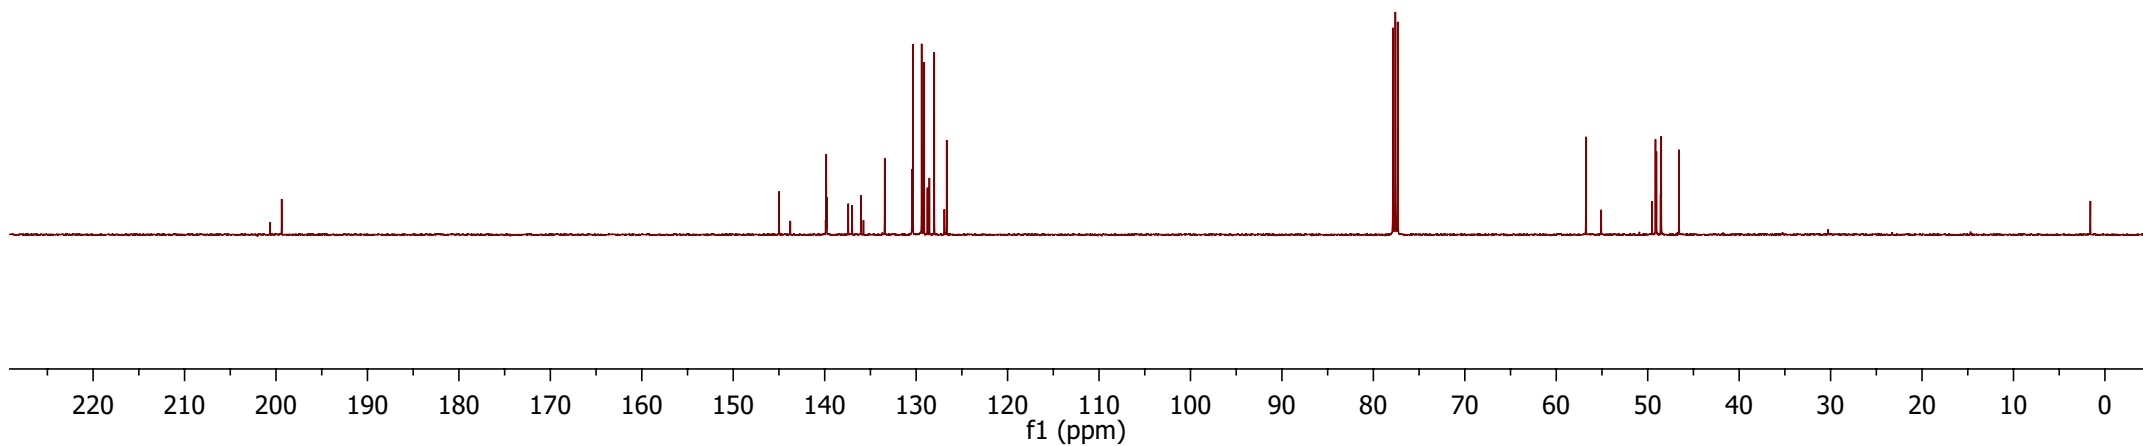



A 7.709 26-2022  
 D 7.709 48022  
 1H 8scan CDCl3 (DMSO-d6) Spectra pmr 51  
 7.724  
 7.720  
 7.710  
 7.707  
 7.578  
 7.574  
 7.565  
 7.561  
 7.520  
 7.517  
 7.507  
 7.503  
 7.314  
 7.298  
 7.289  
 7.284  
 7.275  
 7.272  
 7.260  
 7.245  
 7.230  
 7.212  
 7.208  
 7.198  
 7.185  
 7.181  
 7.151  
 7.137  
 6.472  
 6.466  
 6.461  
 6.454  
 5.881  
 5.875  
 5.869  
 5.864  
 3.852  
 3.852  
 3.845  
 3.842  
 3.835  
 3.436  
 3.429  
 3.361  
 3.358  
 3.350  
 3.310  
 3.164  
 3.127  
 3.115  
 2.036  
 2.019  
 1.884  
 1.867  
 1.666  
 1.663  
 1.649  
 1.646  
 1.567  
 1.563  
 1.549

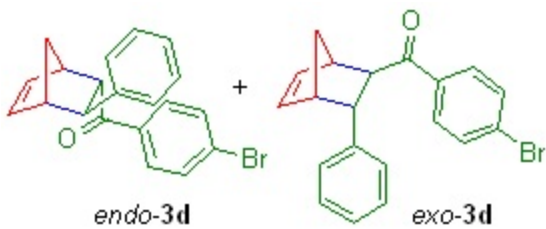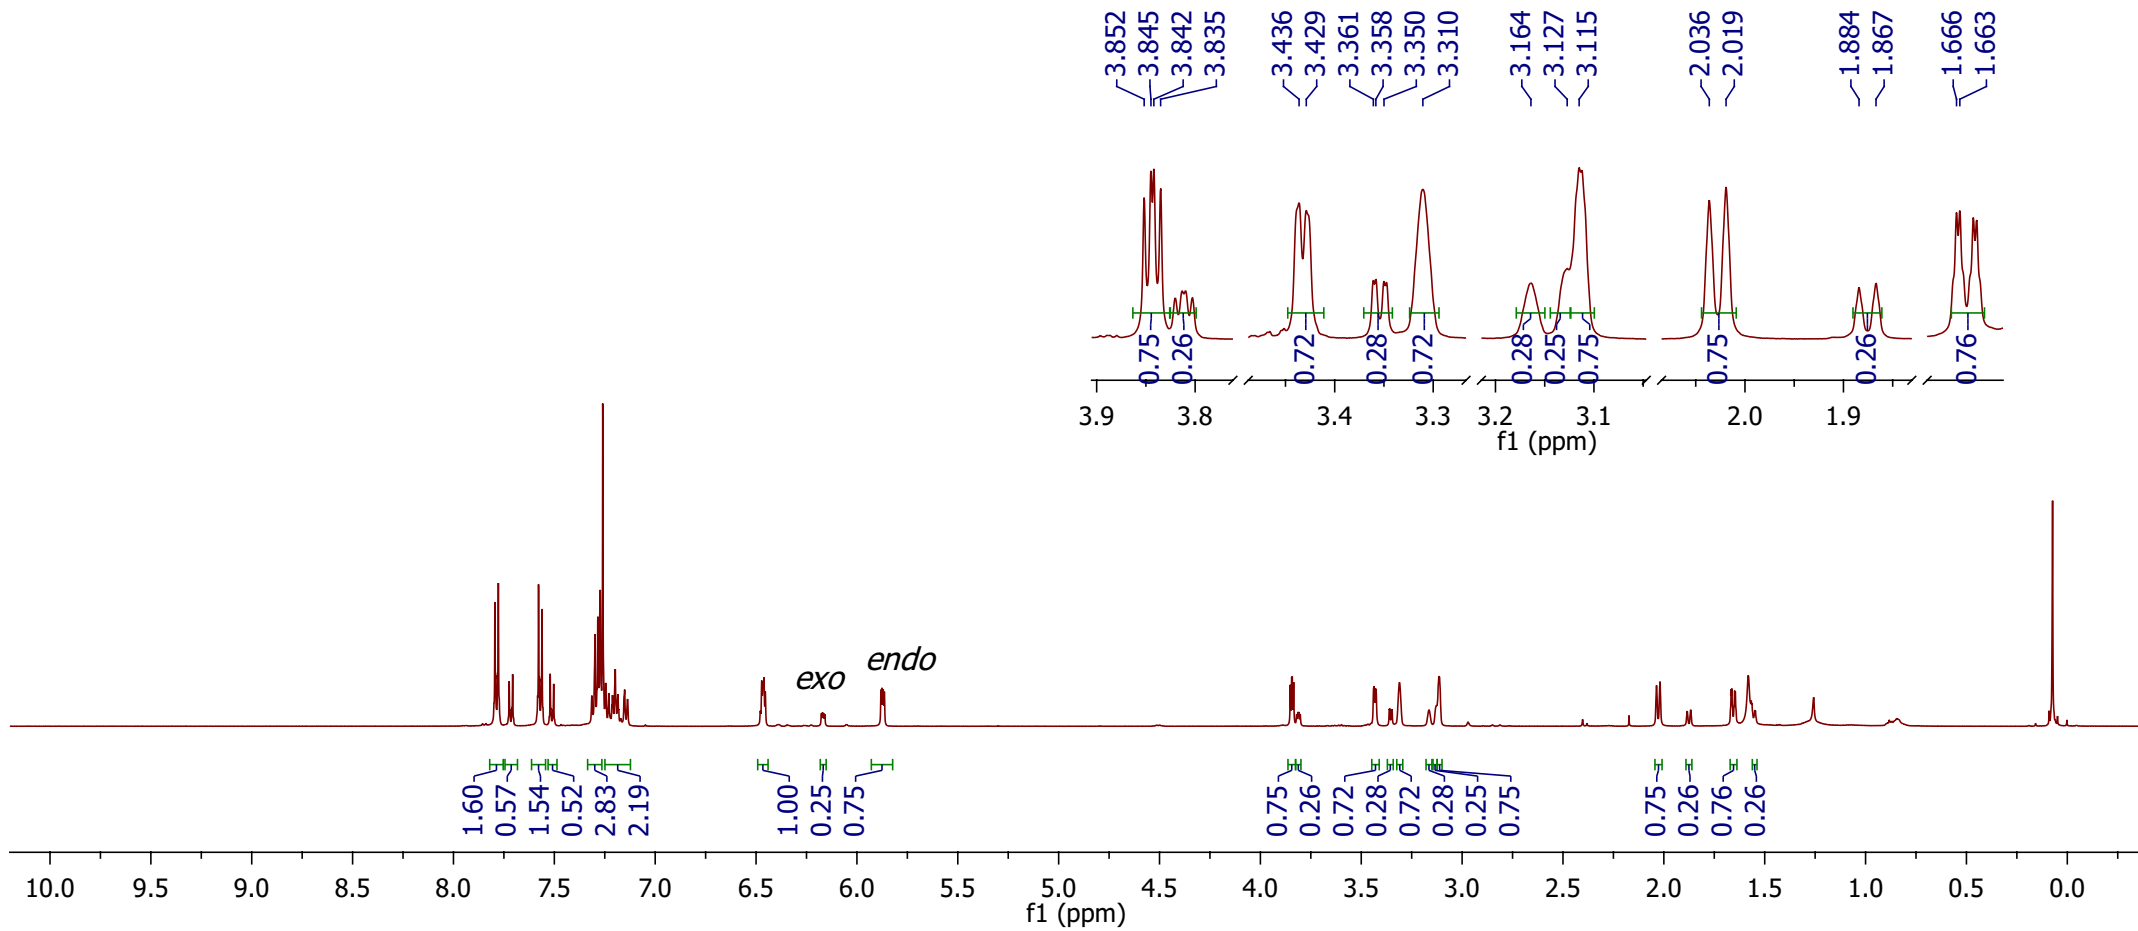

Apr27-2022  
DT-55 4-Br  
C13CPD CDCl<sub>3</sub> {D:\Spectra} nmr 7

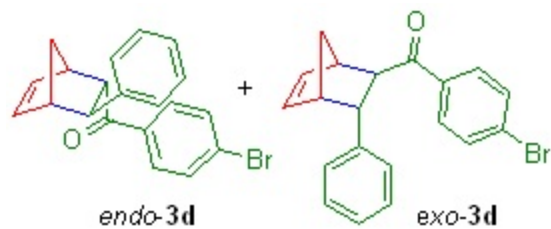

144.48  
143.26  
139.35  
136.94  
136.51  
135.97  
135.69  
132.95  
131.91  
131.86  
130.09  
129.98  
128.68  
128.28  
128.06  
127.98  
127.54  
126.44  
126.18  
  
77.35  
77.09  
76.84  
  
56.28  
54.59  
49.05  
48.68  
48.65  
48.55  
48.13  
48.10  
48.03  
46.10

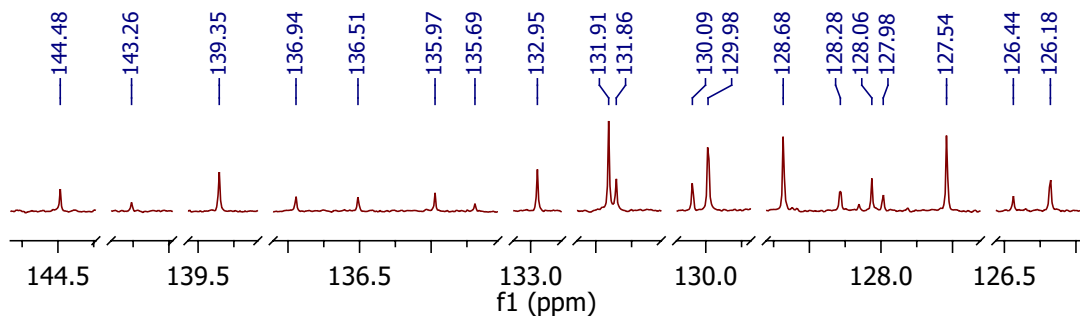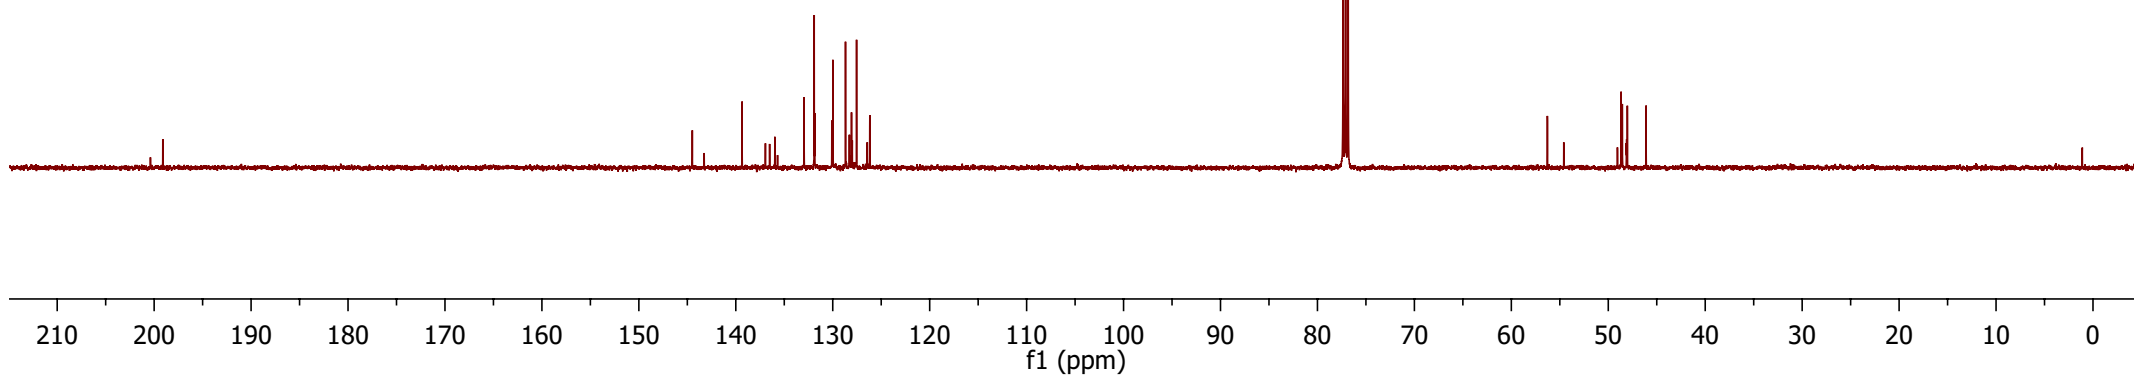

Apr29-2022  
DT-53 OCH3  
1H\_8scan CDCl3 {D:\Spectra} nmr

7.857  
7.841  
7.804  
7.787  
7.291  
7.287  
7.281  
7.260  
6.480  
6.472  
6.465  
6.455  
6.174  
6.168  
6.163  
6.157  
5.883  
5.878  
5.872  
5.867  
3.913  
3.899  
3.892  
3.889  
3.882  
3.484  
3.477  
3.423  
3.335  
3.211  
2.404  
2.383  
2.034  
2.018  
1.915  
1.898  
1.653  
1.650  
1.637  
1.634  
1.543  
1.541  
1.526  
1.524

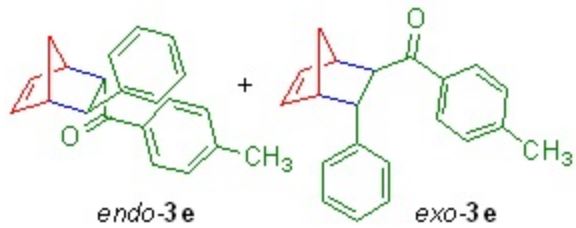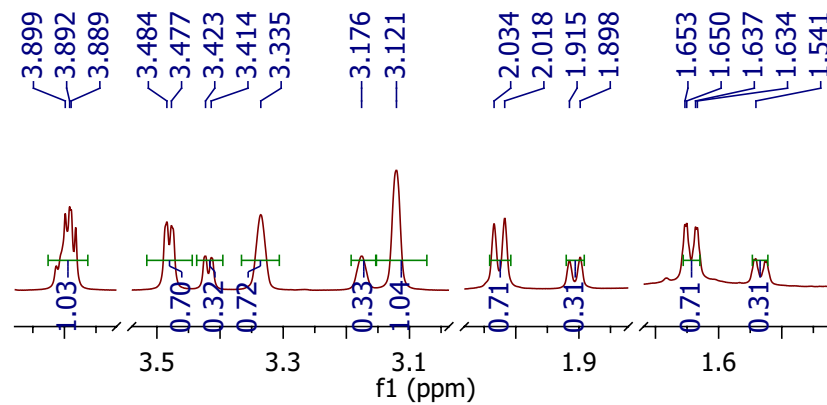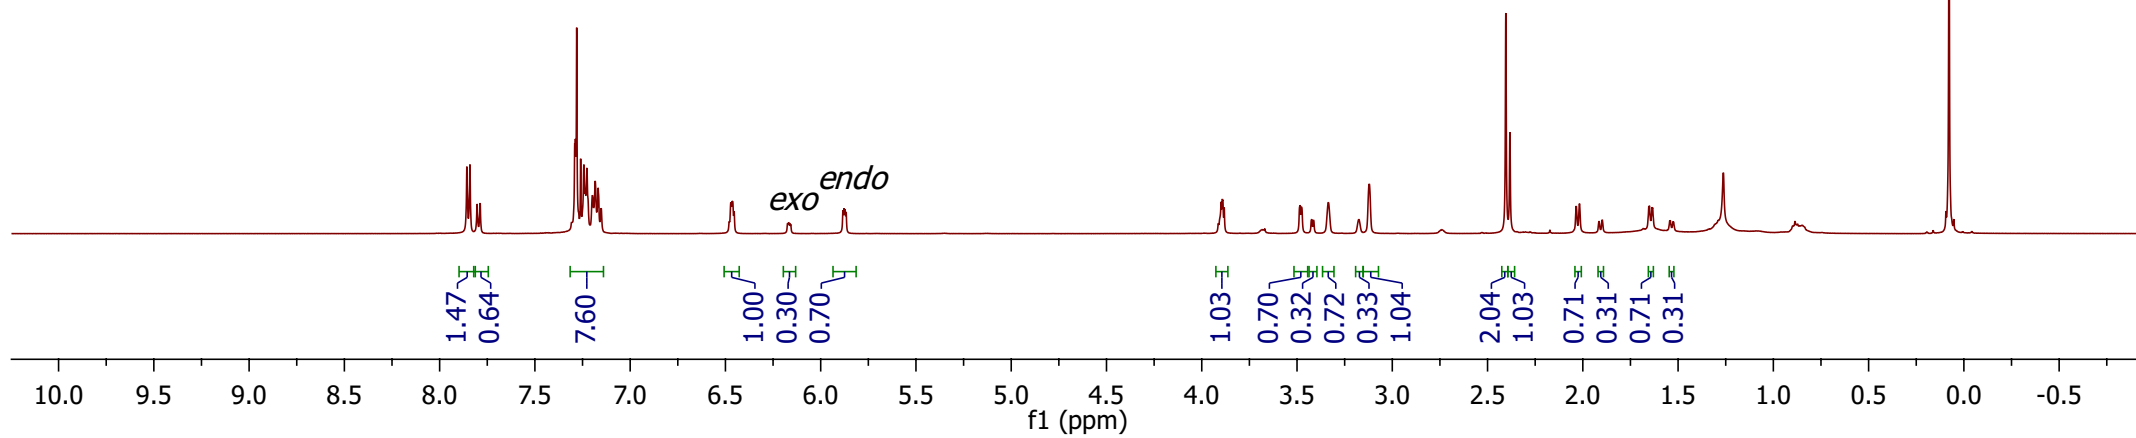

Apr29-2022  
DT-53 OCH3  
C13CPD CDCI3 {D:\Spectra\mfr 30

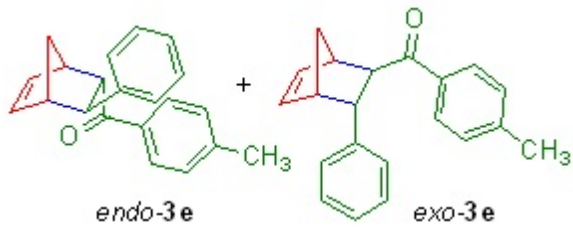

144.84  
143.71  
143.67  
143.60  
139.17  
136.83  
136.62  
134.74  
134.51  
133.04  
129.28  
129.26  
128.68  
128.58  
128.16  
128.11  
127.58  
126.20  
125.99  
77.35  
77.09  
76.84  
56.08  
54.36  
49.00  
48.81  
48.77  
48.54  
48.08  
47.91  
47.77  
45.84  
-21.67

-1.10

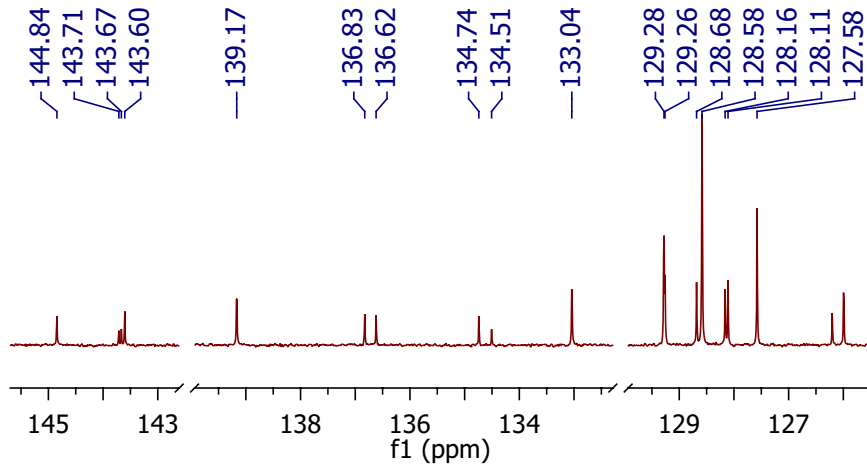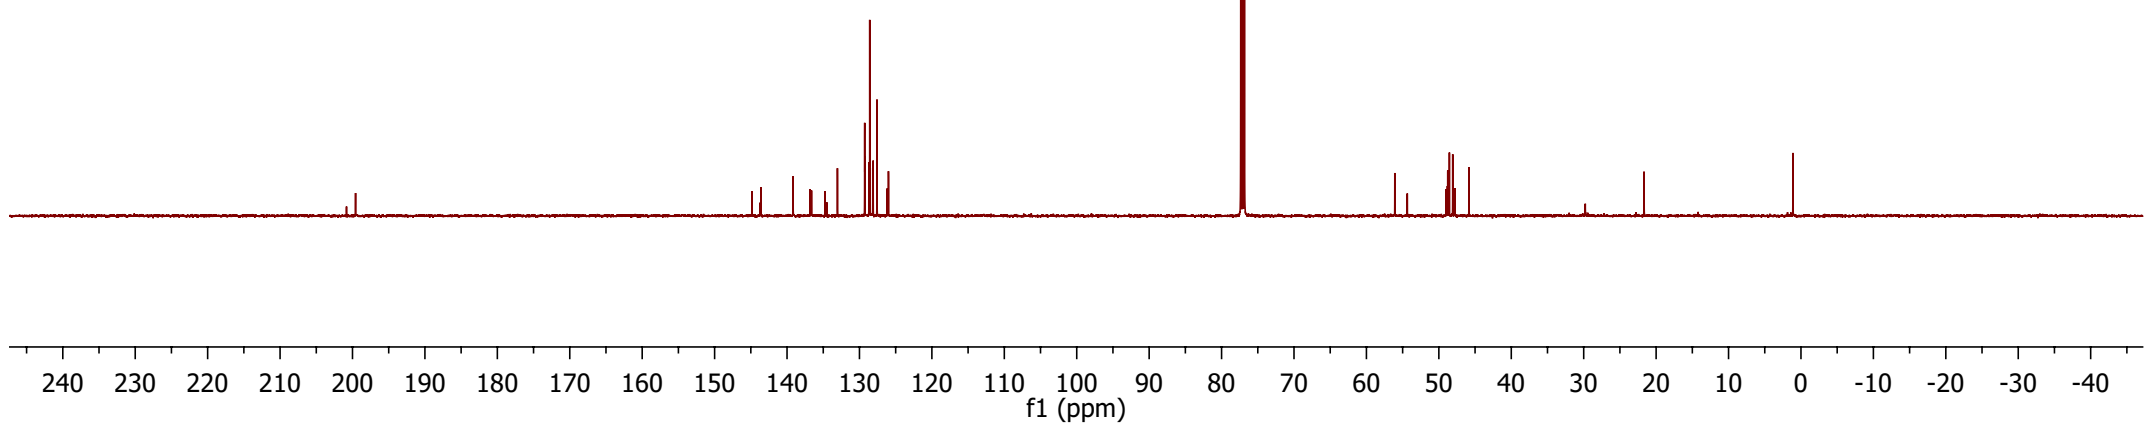

Desktop  
DT-53  
1H\_8scan CDC3-(D)-Spectra

7.948  
7.943  
7.939  
7.929  
7.925  
7.919  
7.878  
7.874  
7.864  
7.860

7.286  
7.275  
7.260  
6.918  
6.900  
6.468  
6.462  
6.457  
6.451  
6.172  
6.166  
6.160  
6.155  
5.895  
5.890  
5.884  
5.879

3.871  
3.864  
3.860  
3.855  
3.840

3.473  
3.469  
3.463  
3.459  
3.388  
3.377  
3.328  
3.115  
2.030  
2.013  
1.651  
1.648  
1.634  
1.631

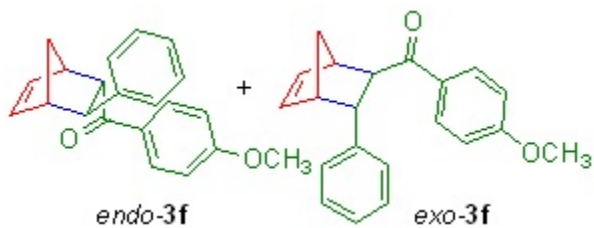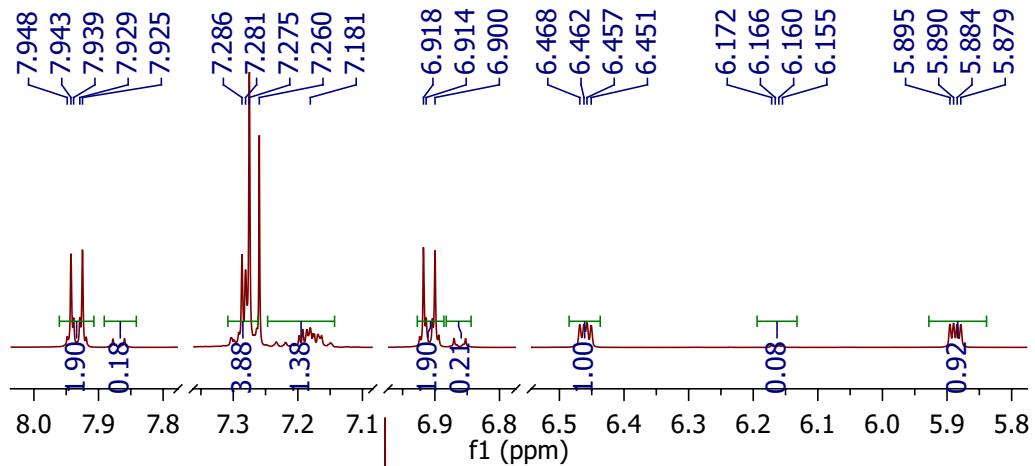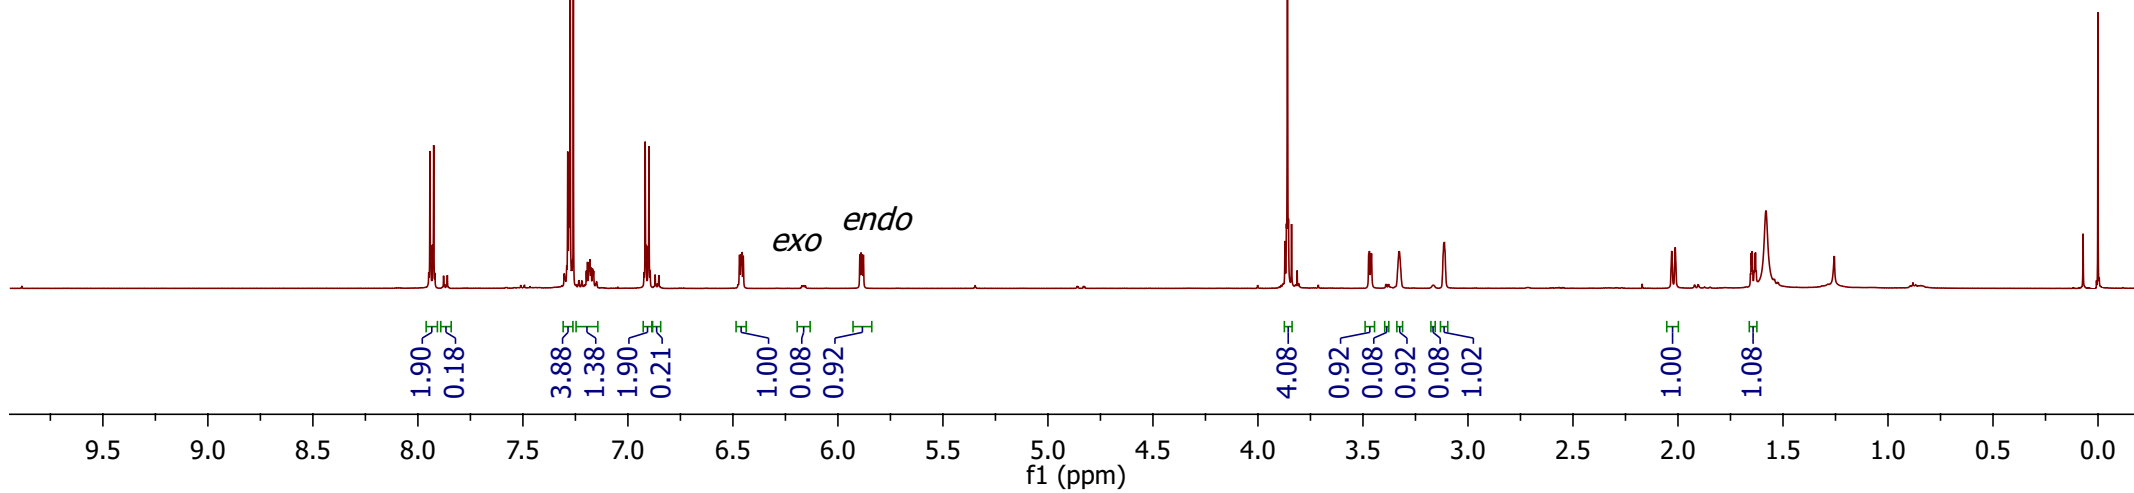

Desktop  
DT-53  
C13CPD CDCl<sub>3</sub> {D:\Spectra} nmr 8

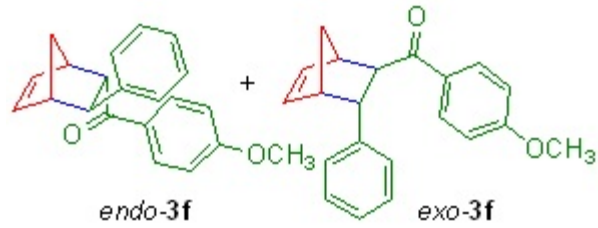

198.53  
193.40  
163.42  
144.97  
139.16  
133.17  
130.79  
130.73  
130.30  
128.65  
127.65  
126.05  
113.81  
77.41  
77.16  
76.91  
55.90  
55.60  
48.89  
48.61  
48.17  
46.02

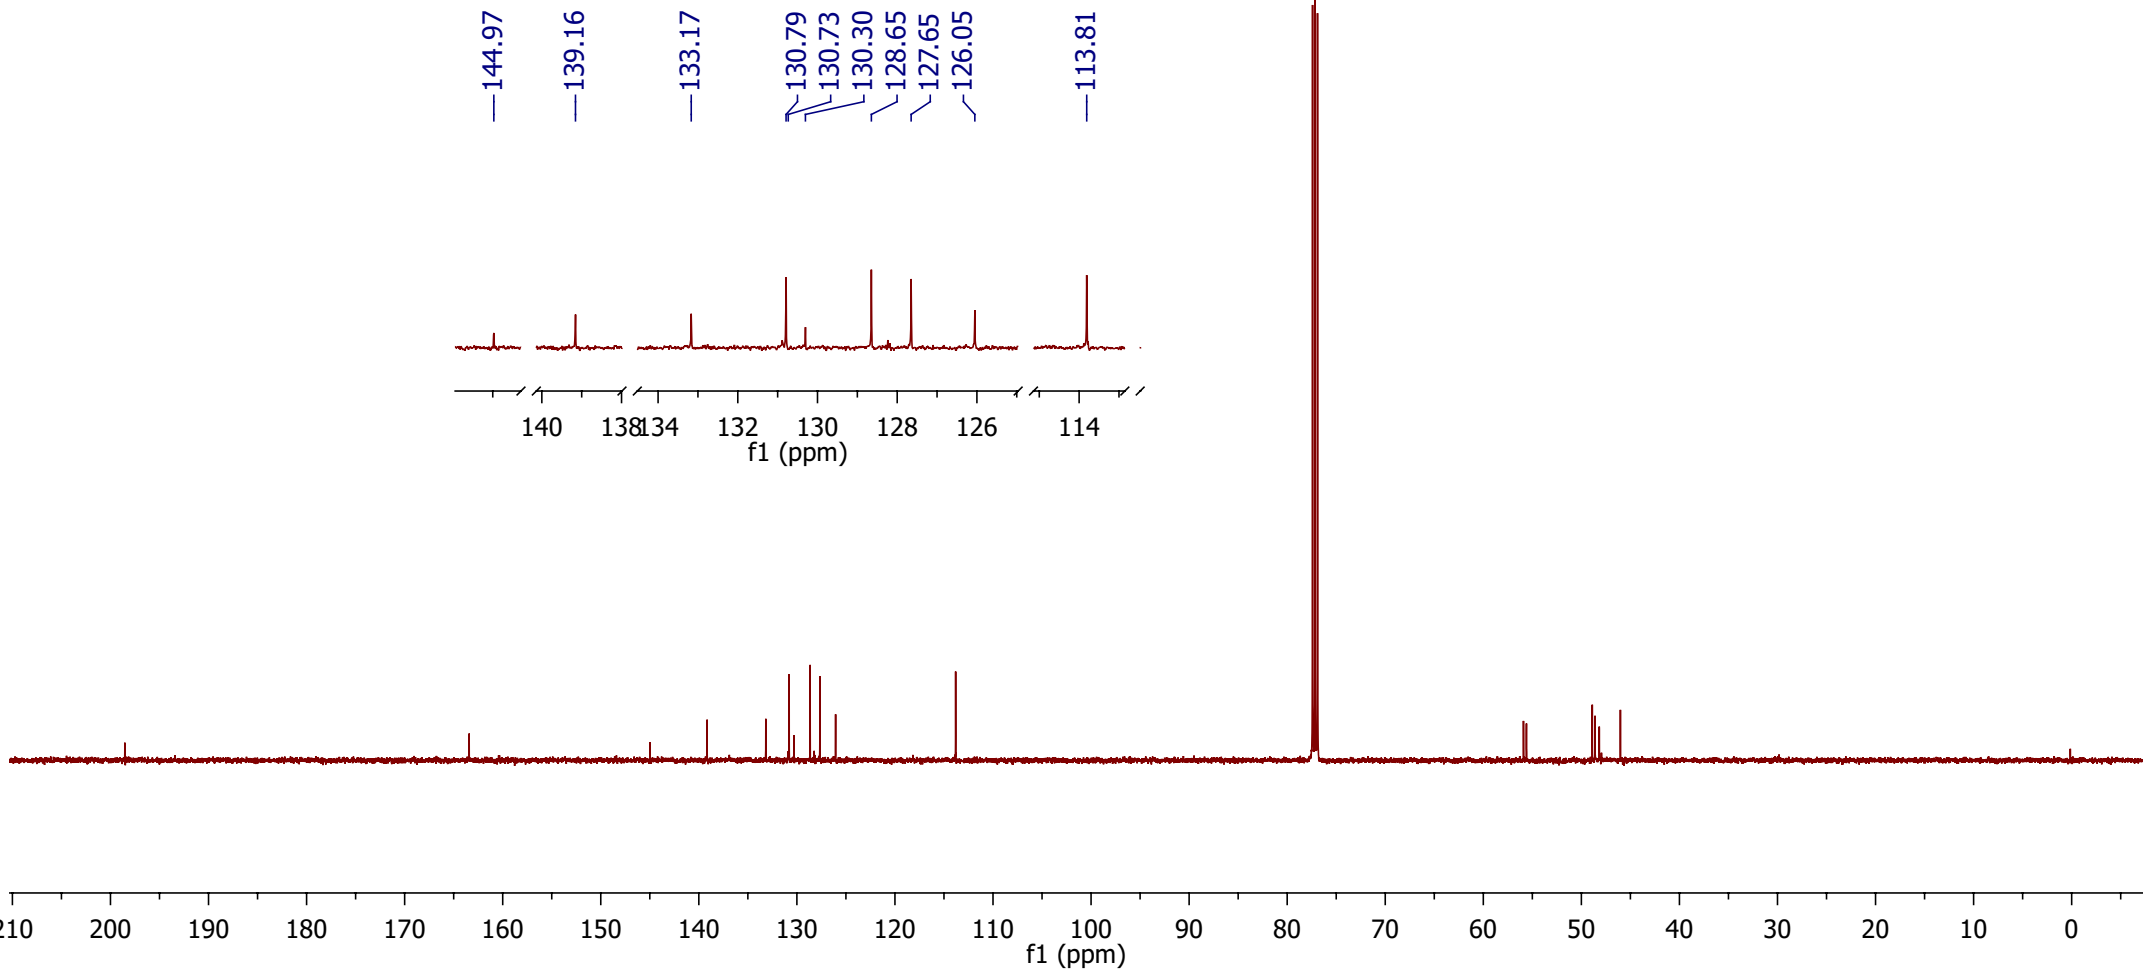

17.7412  
 17.5416  
 17.5416  
 17.9216  
 17.923  
 17.893  
 17.890  
 17.876  
 17.873  
 17.554  
 17.539  
 17.532  
 17.464  
 17.448  
 17.434  
 17.424  
 17.409  
 17.408  
 17.393  
 17.265  
 17.243  
 17.232  
 17.226  
 17.225  
 17.215  
 17.129  
 17.118  
 17.112  
 17.102  
 16.994  
 16.977  
 16.959  
 16.941  
 16.924  
 16.906  
 16.465  
 16.460  
 15.880  
 15.874  
 15.869  
 15.863  
 13.850  
 13.843  
 13.840  
 13.833  
 13.385  
 13.382  
 13.374  
 13.371  
 13.147  
 13.144  
 13.143  
 13.140  
 13.136  
 13.082  
 2.008  
 1.991  
 1.878  
 1.673  
 1.670  
 1.653  
 1.541  
 1.537

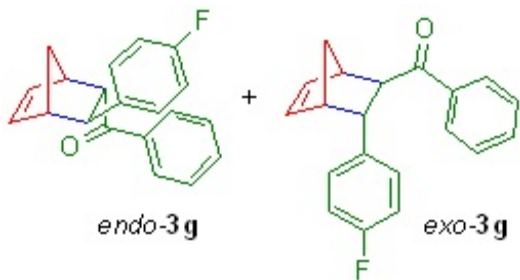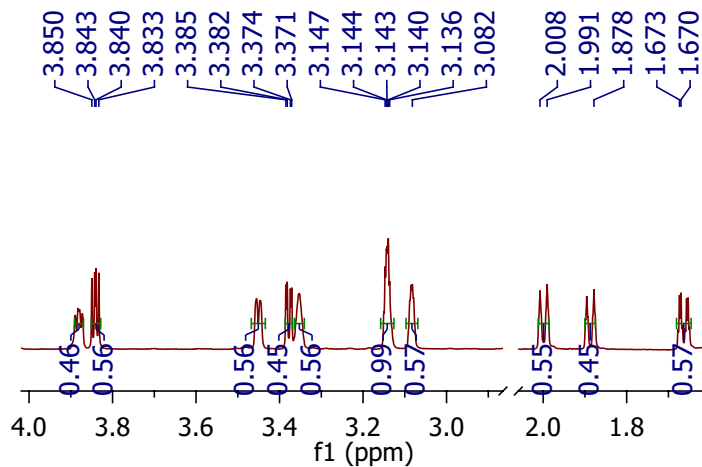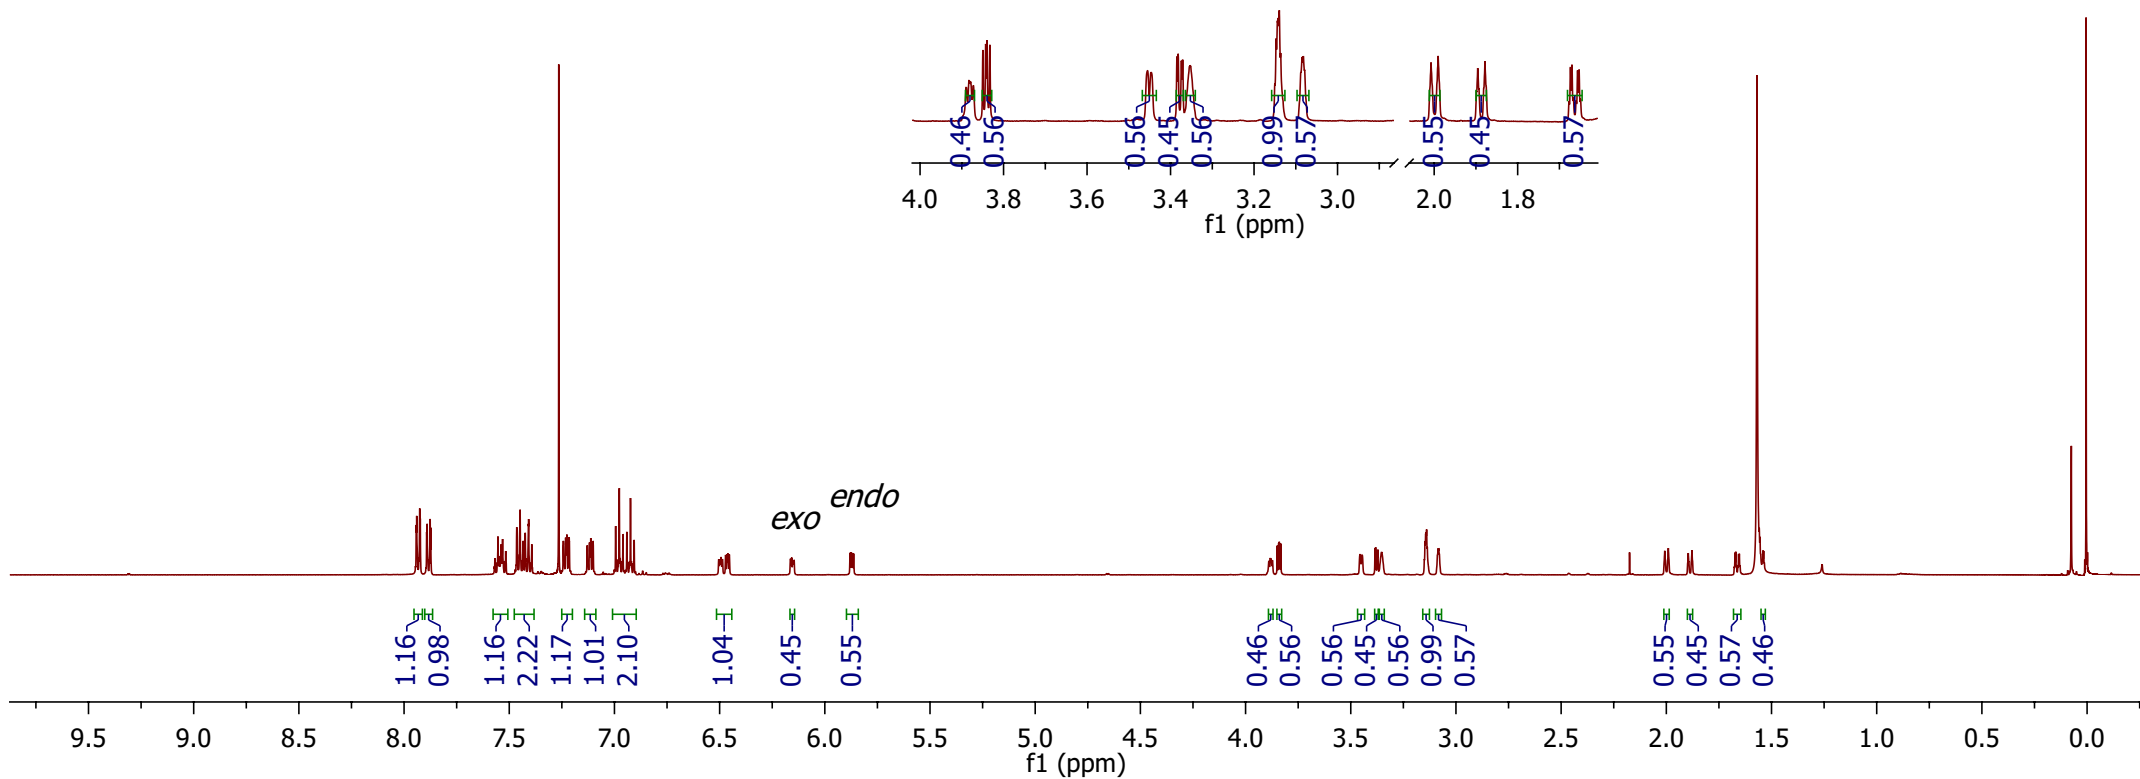

Jul27-2023  
DT-59  
C13CPD

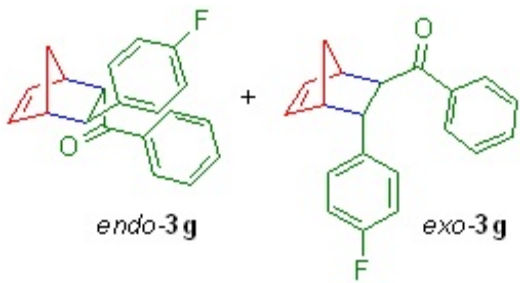

101.103  
600.003  
140.40  
139.29  
136.99  
136.86  
136.77  
133.12  
133.05  
133.00  
129.49  
129.43  
128.97  
128.90  
128.72  
128.69  
128.60  
128.48  
115.47  
115.30  
115.07  
114.91

77.41  
77.16  
76.90  
56.58  
54.90  
49.02  
48.76  
48.72  
48.11  
48.03  
47.08  
45.24

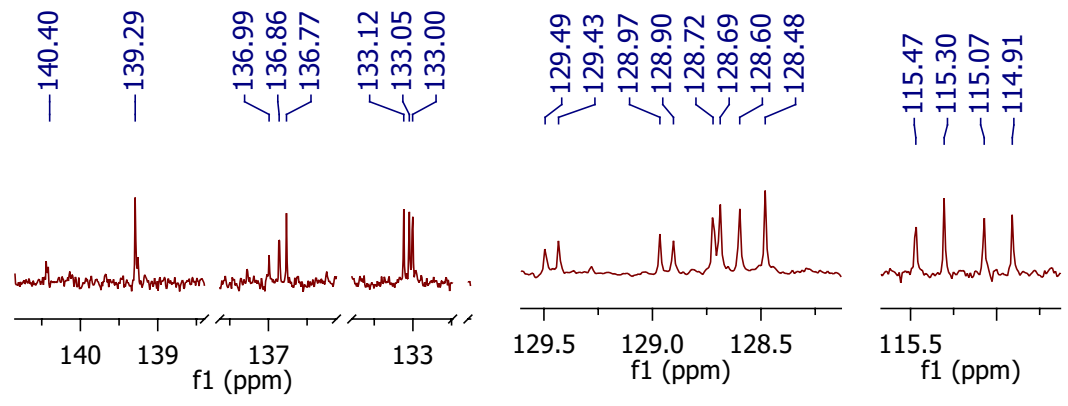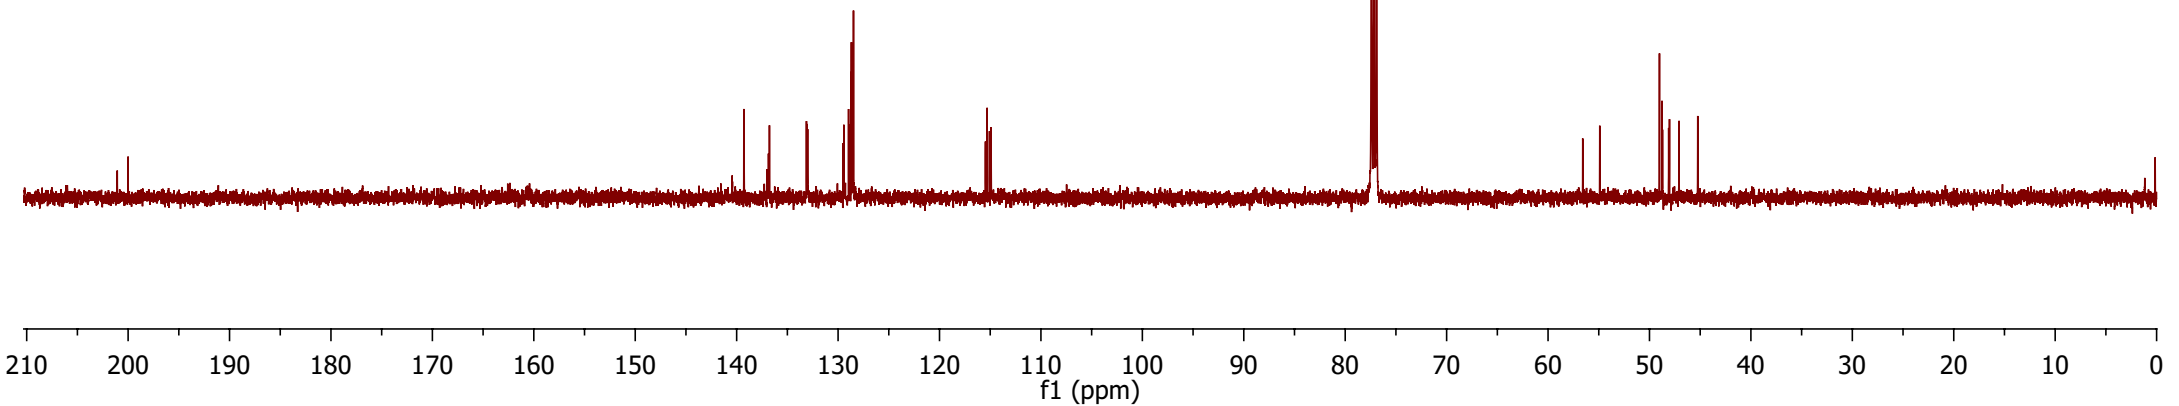



J:\8scan\CDCl3(DMSO-d6)\Spectra\hmr27

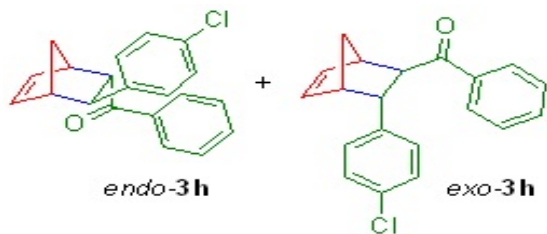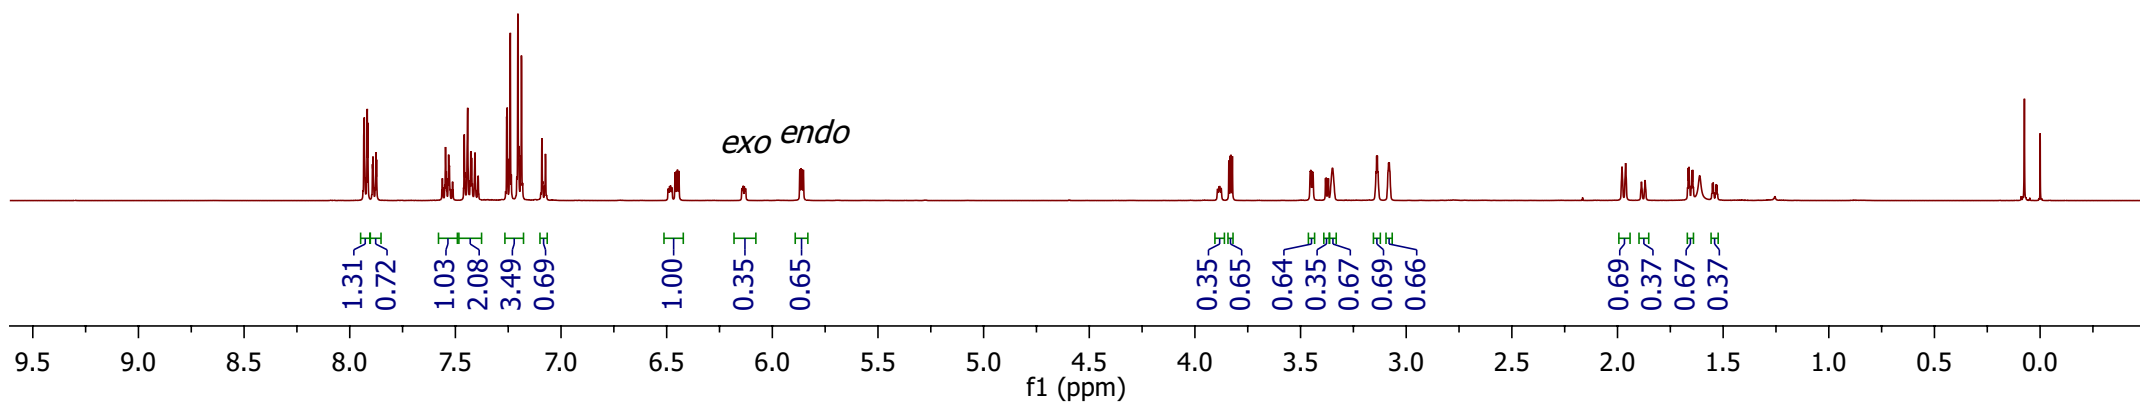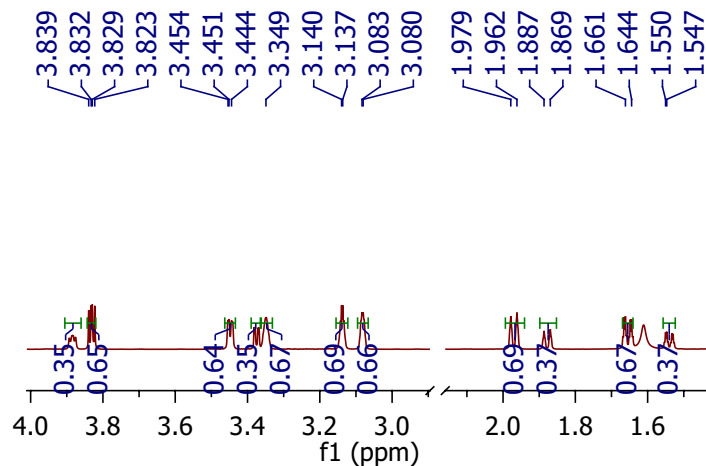

Jul26-2025  
DT-61  
C13CP1 CDCl3 {D:\Spectra} nmr 27

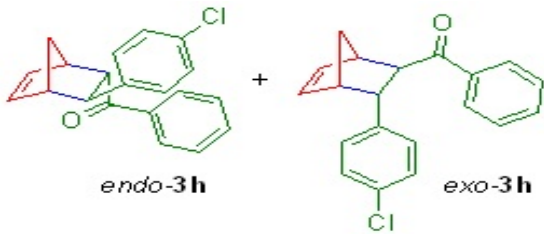

143.31  
142.13  
139.22  
137.20  
136.91  
136.68  
133.15  
133.08  
133.03  
132.06  
131.82  
129.43  
128.93  
128.73  
128.58  
128.46  
128.33

77.41  
77.16  
76.91

56.49  
54.69  
49.05  
48.91  
48.77  
48.52  
48.12  
47.97  
47.17  
45.34

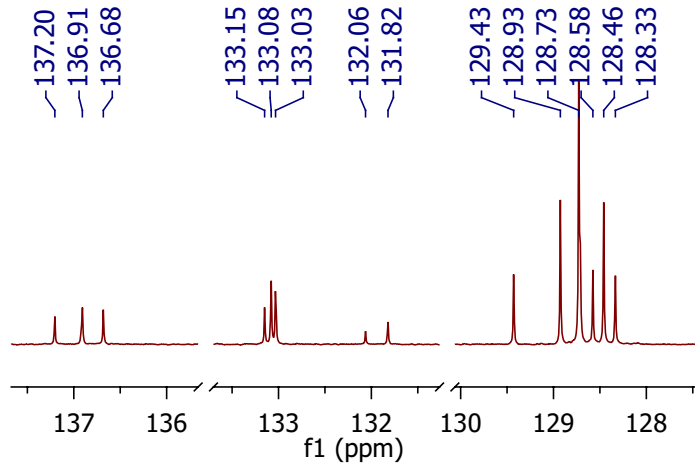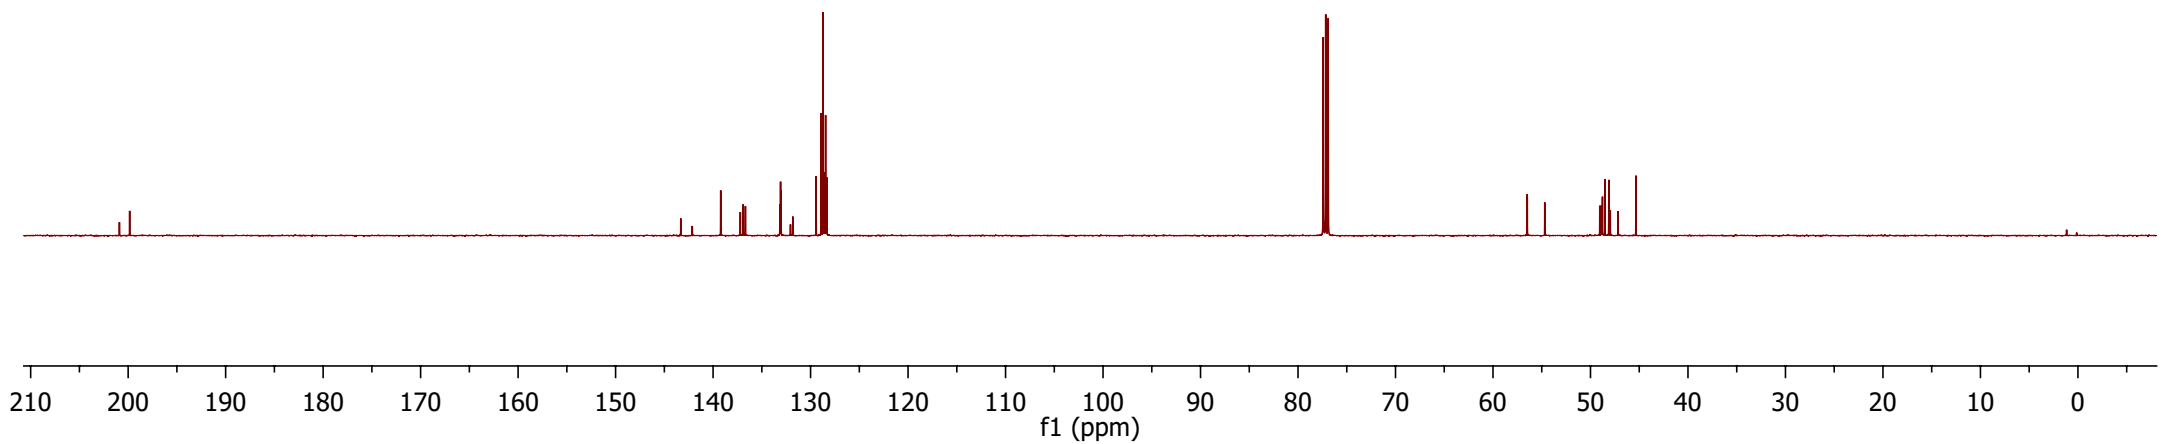

17.7861  
 17.6319  
 17.4222  
 17.3922  
 17.3900  
 17.3897  
 17.3883  
 17.3880  
 17.3553  
 17.3550  
 17.3540  
 17.3538  
 17.3535  
 17.464  
 17.461  
 17.448  
 17.433  
 17.432  
 17.415  
 17.412  
 17.408  
 17.399  
 17.395  
 17.360  
 17.347  
 17.343  
 17.260  
 17.156  
 17.154  
 17.143  
 17.140  
 17.042  
 17.025  
 16.465  
 16.458  
 16.453  
 16.447  
 15.874  
 15.868  
 15.862  
 15.857  
 13.843  
 13.836  
 13.833  
 13.826  
 13.444  
 13.437  
 13.385  
 13.382  
 13.374  
 13.372  
 13.354  
 13.145  
 13.142  
 13.088  
 13.086  
 1.979  
 1.962  
 1.891  
 1.874  
 1.673  
 1.670  
 1.653  
 1.649  
 1.555  
 1.552  
 1.538  
 1.535  
 1.673  
 1.670  
 1.653  
 1.649  
 1.555  
 1.552  
 1.538  
 1.535

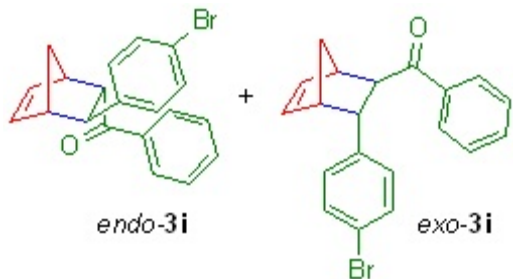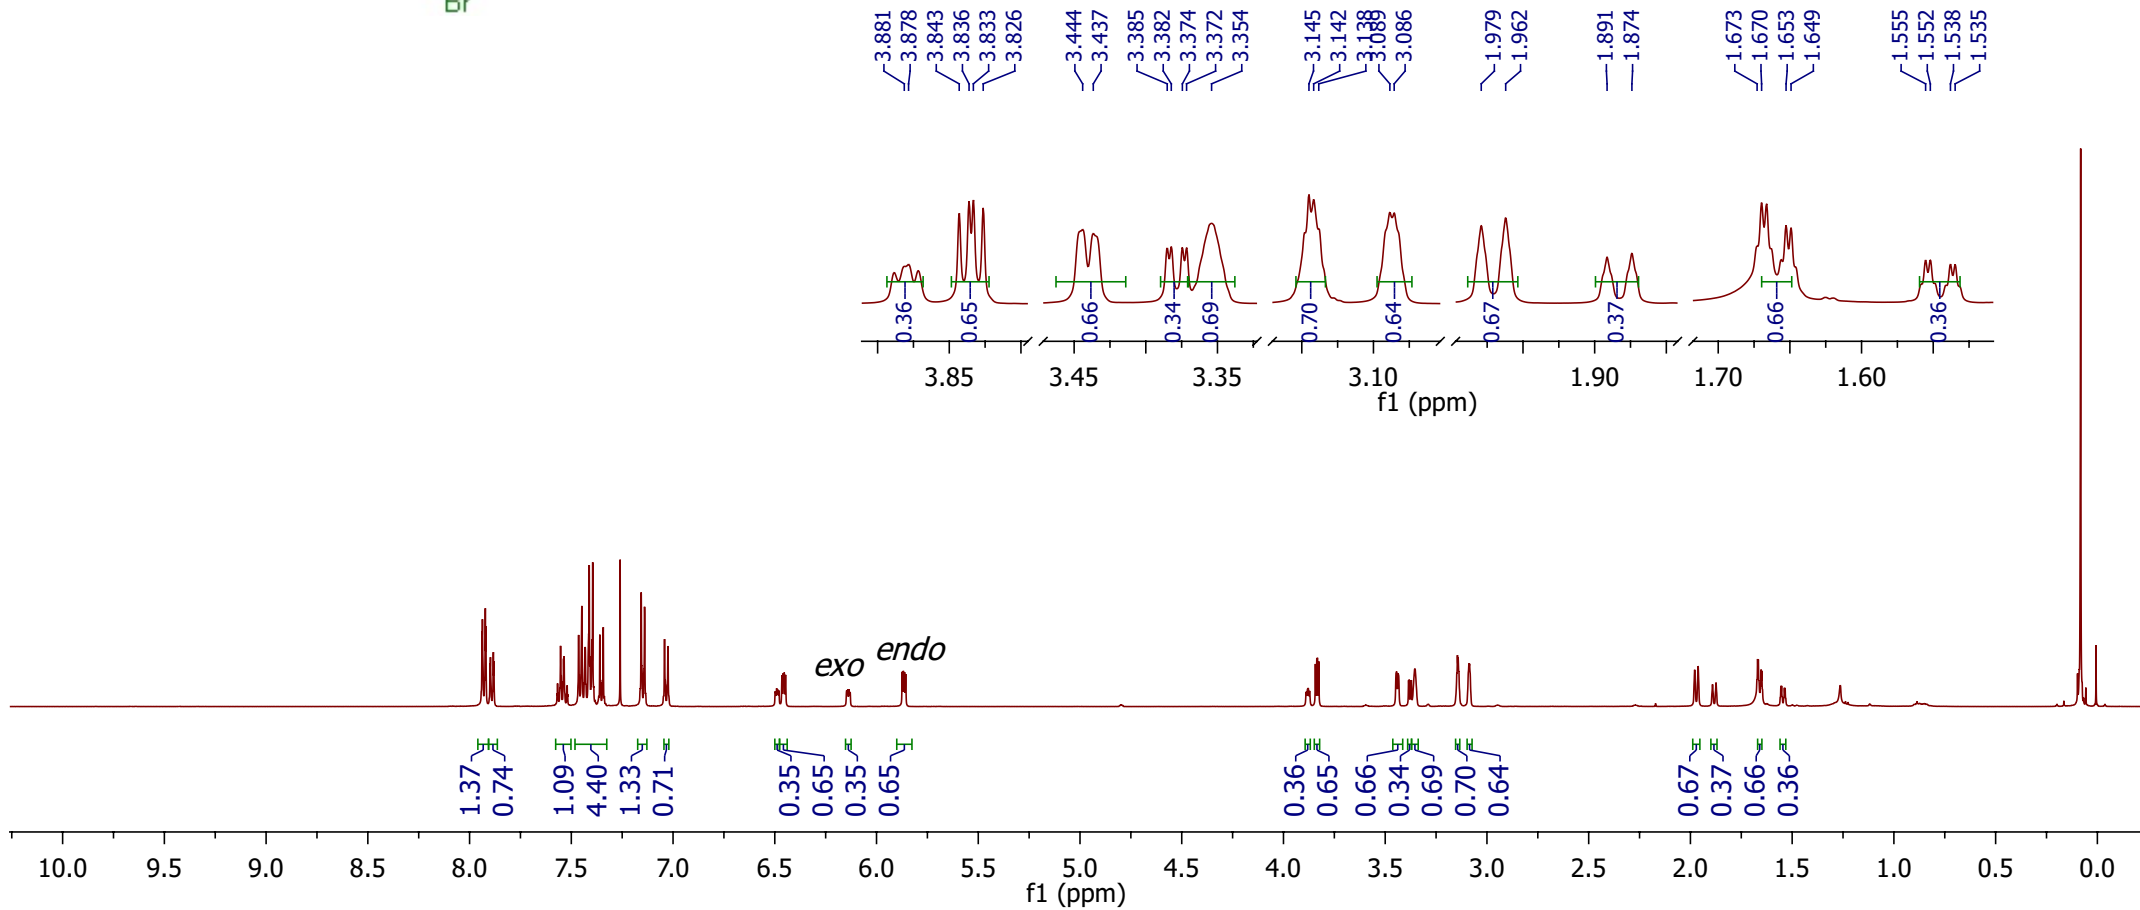

Jul19-2022  
DT-66 4B  
C13CPD CDCl3 {D:\Spectra\}

199.74  
143.78  
142.60  
139.14  
137.12  
136.85  
136.83  
136.59  
133.09  
133.01  
132.97  
131.61  
131.22  
129.76  
129.27  
128.65  
128.50  
128.39  
120.05  
119.77

77.35  
77.09  
76.84

56.38  
54.58  
48.99  
48.79  
48.71  
48.37  
48.06  
47.89  
47.14  
45.31

—1.09

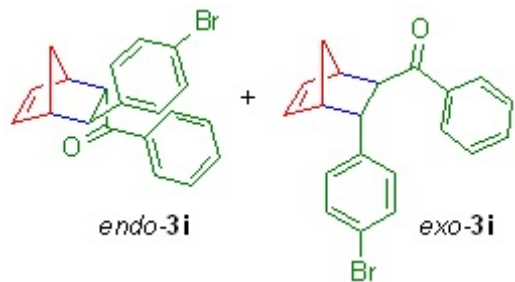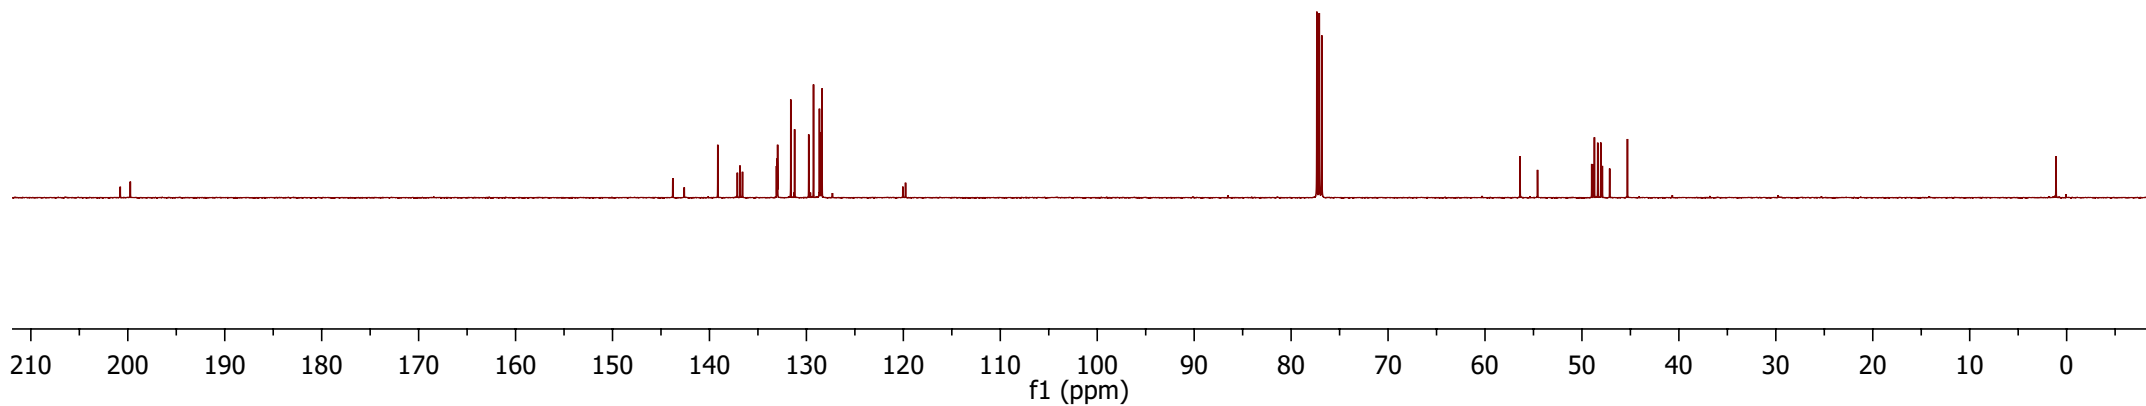

J: 17.75519  
 D5: 17.75519  
 F1: 8 scan CDCl3 (D) Spectra hmr 13  
 17.75519  
 7.912  
 7.912  
 7.898  
 7.895  
 7.544  
 7.540  
 7.529  
 7.527  
 7.523  
 7.508  
 7.457  
 7.454  
 7.441  
 7.426  
 7.419  
 7.403  
 7.388  
 7.260  
 7.197  
 7.181  
 7.124  
 7.108  
 7.061  
 6.480  
 6.474  
 6.469  
 6.463  
 5.890  
 5.885  
 5.879  
 5.873  
 3.915  
 3.908  
 3.905  
 3.898  
 3.881  
 3.453  
 3.434  
 3.432  
 3.424  
 3.421  
 3.415  
 3.402  
 3.395  
 3.388  
 3.381  
 3.164  
 3.135  
 3.102  
 3.099  
 2.045  
 2.028  
 1.916  
 1.899  
 1.657  
 1.654  
 1.640  
 1.637  
 1.552  
 1.549  
 1.535  
 1.549  
 1.552  
 1.637  
 1.640  
 1.654  
 1.657  
 1.899  
 1.916  
 2.028  
 2.045  
 3.099  
 3.102  
 3.135  
 3.164  
 3.415  
 3.421  
 3.424  
 3.432  
 3.434  
 3.445  
 3.453

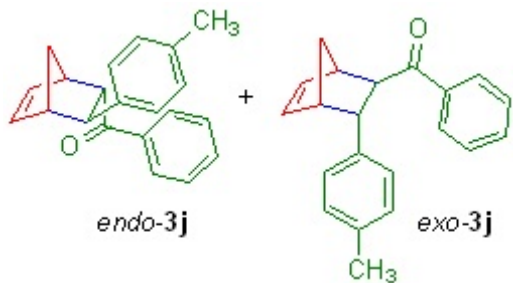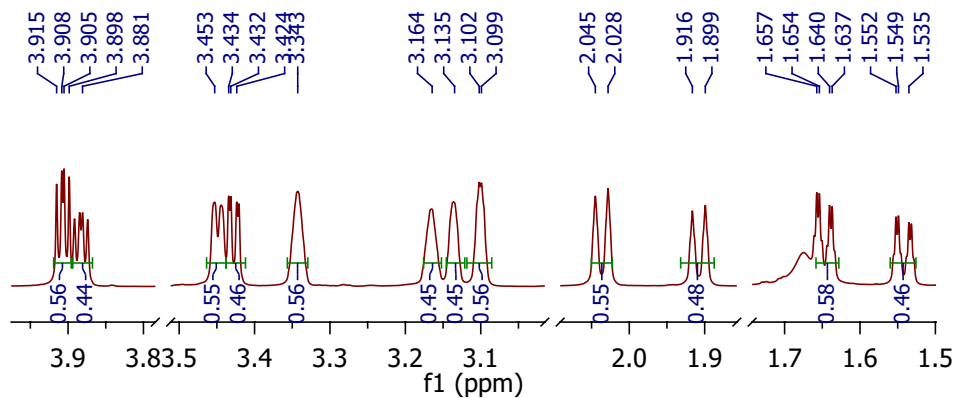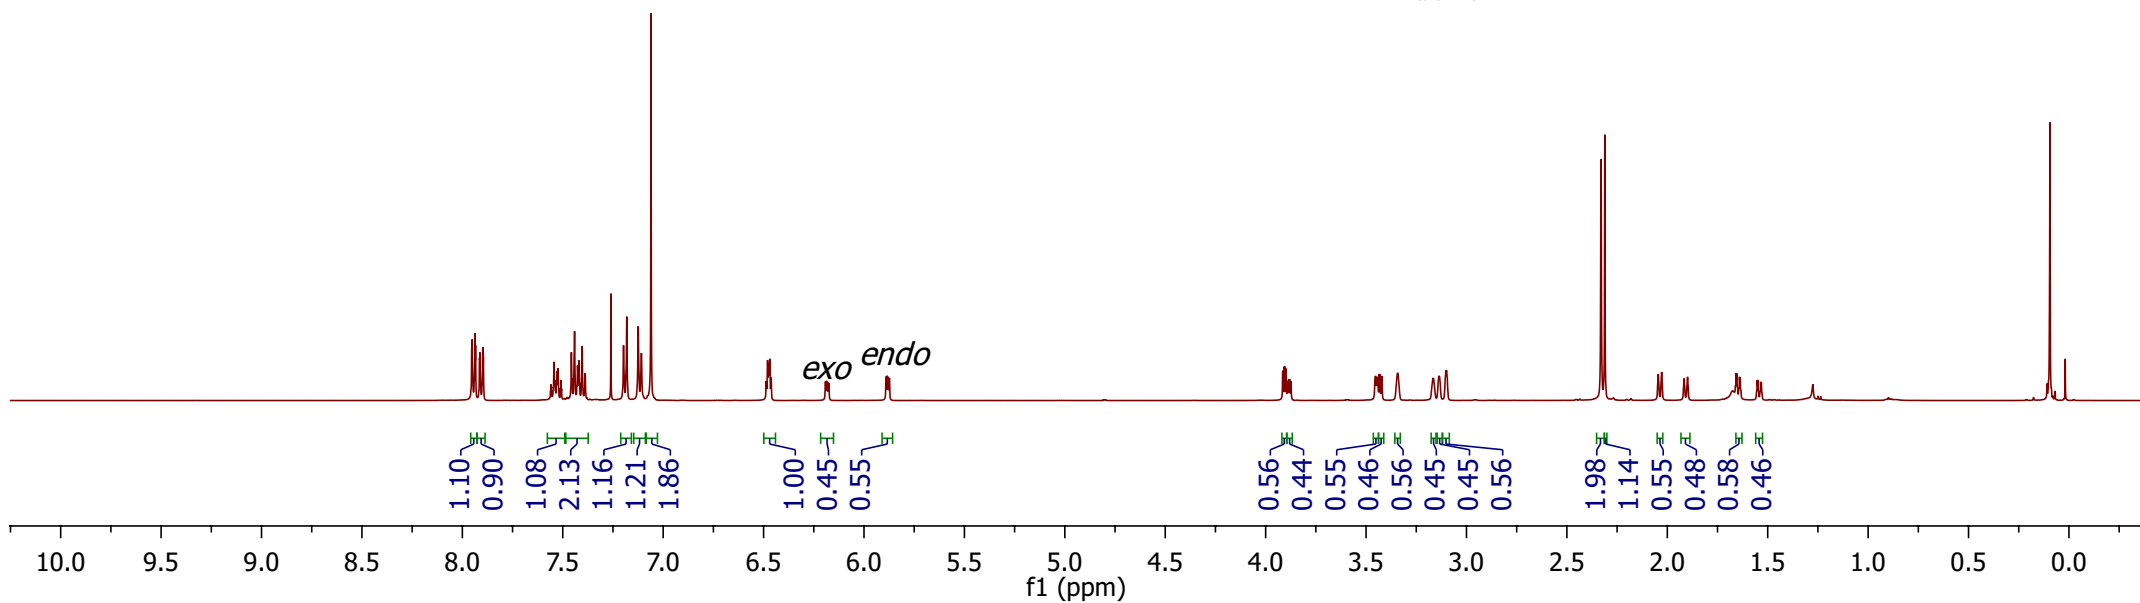

Jul19-2022  
DT-67 4-CH3  
C13CPD-CDCI3 {D:\Spectra} nmr 13

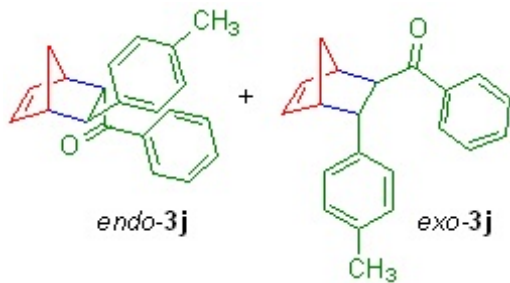

141.64  
140.47  
139.25  
137.32  
137.04  
136.91  
136.50  
135.74  
135.54  
132.92  
132.90  
132.79  
129.26  
128.87  
128.57  
128.54  
128.40  
127.95  
127.44

77.35  
77.09  
76.84

56.23  
54.58  
48.94  
48.86  
48.76  
48.61  
48.03  
47.88  
47.40  
45.55

21.00  
20.98

1.09

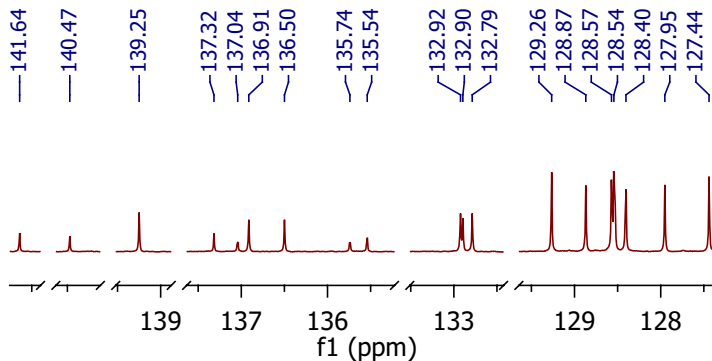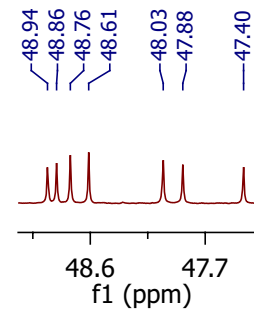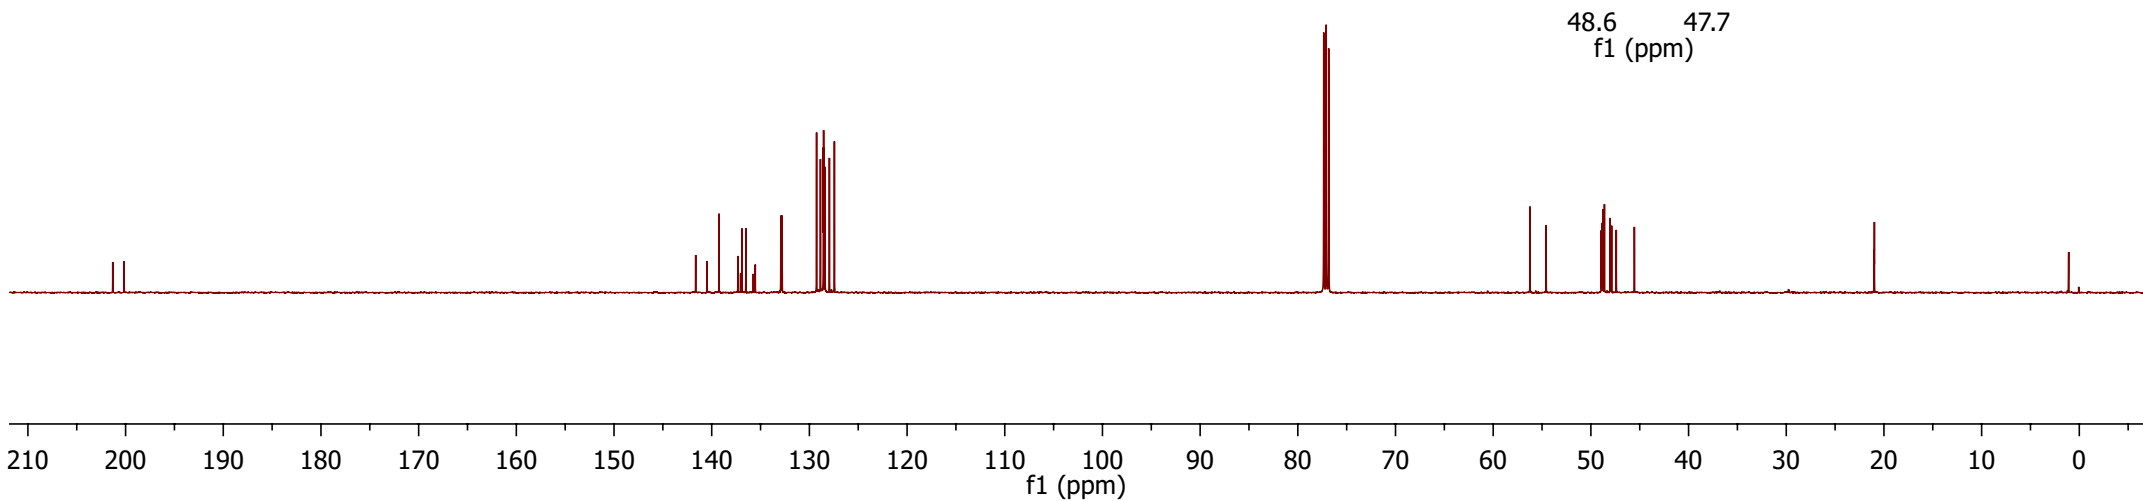

Aug01-2022  
 DT-69  
 1H\_8scan CDCl3 (DMSO-d6) nmr

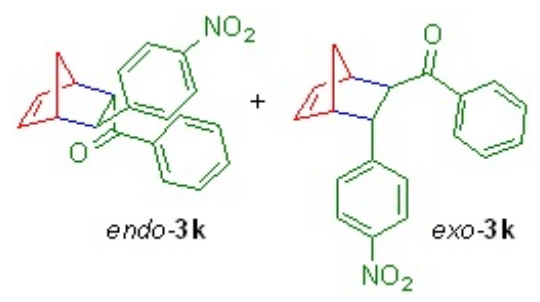

8.102  
 8.097  
 8.094  
 8.084  
 8.080  
 8.075  
 7.927  
 7.926  
 7.911  
 7.909  
 7.455  
 7.439  
 7.318  
 7.301  
 7.260  
 6.550  
 6.544  
 6.539  
 6.529  
 6.147  
 6.141  
 6.135  
 6.130

4.115  
 4.108  
 4.105  
 4.098  
 3.461  
 3.459  
 3.451  
 3.448  
 3.227  
 3.188

1.904  
 1.887  
 1.591  
 1.588  
 1.573  
 1.570

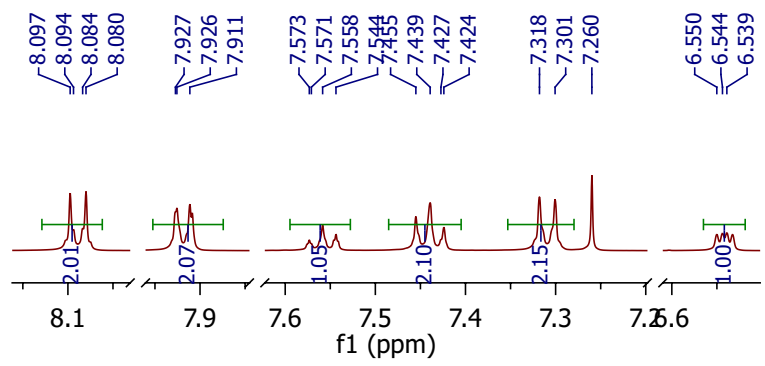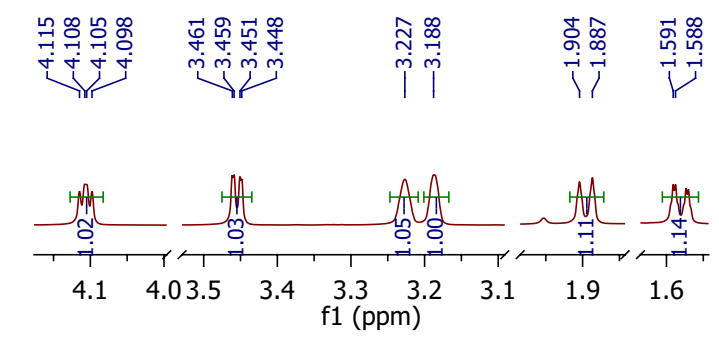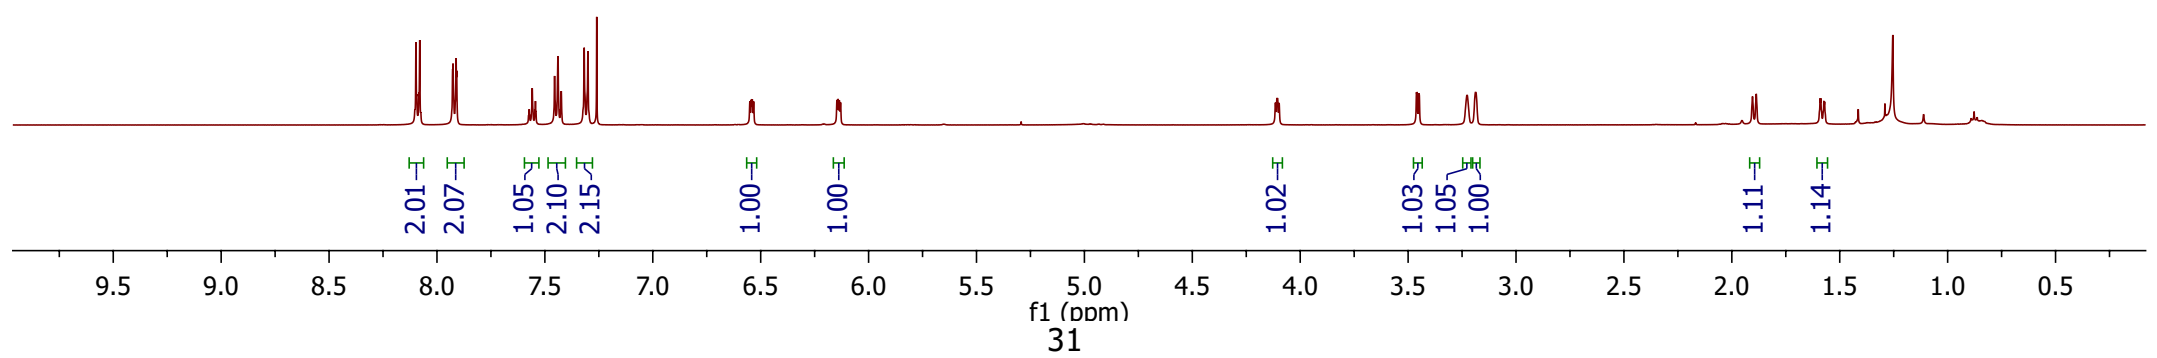

Aug18-2023  
DT-68 P.P  
C13CPD CDCl3 {D:\Spectra} nmr 35

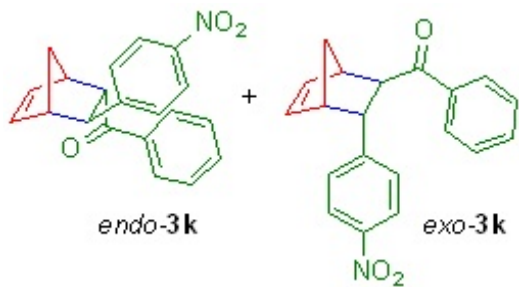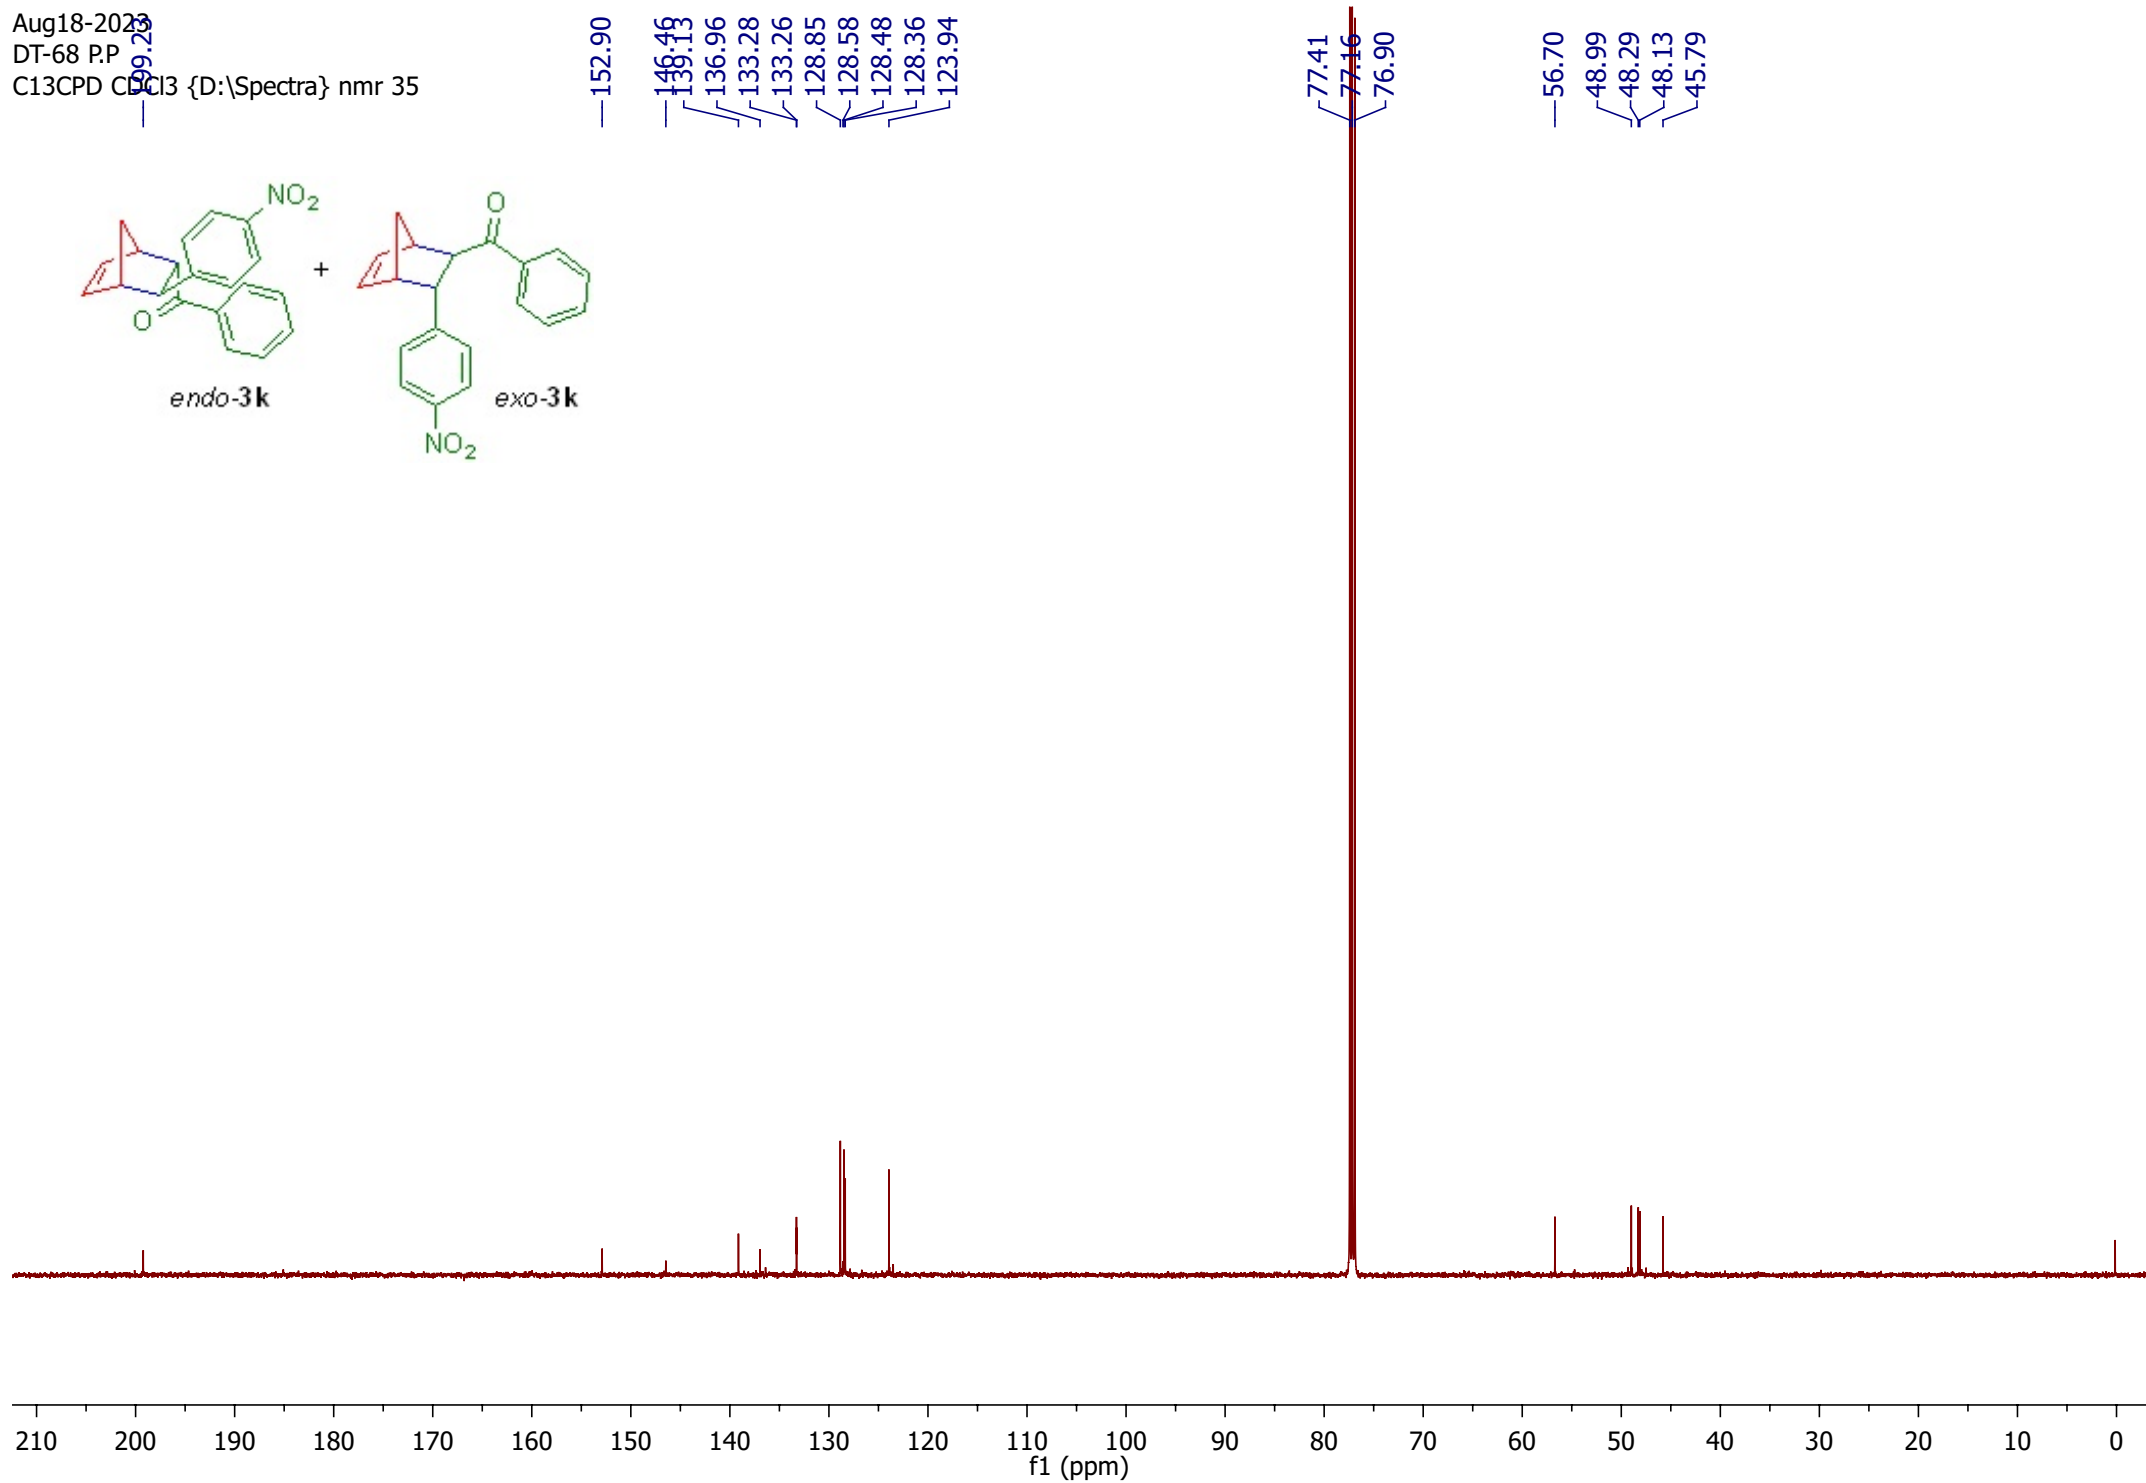



Jul19-2022  
DT-68 4-CN  
1H\_8scan CDCl3 (DMSO-d6) Spectra hmr 14

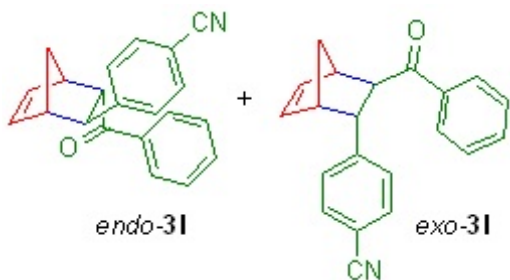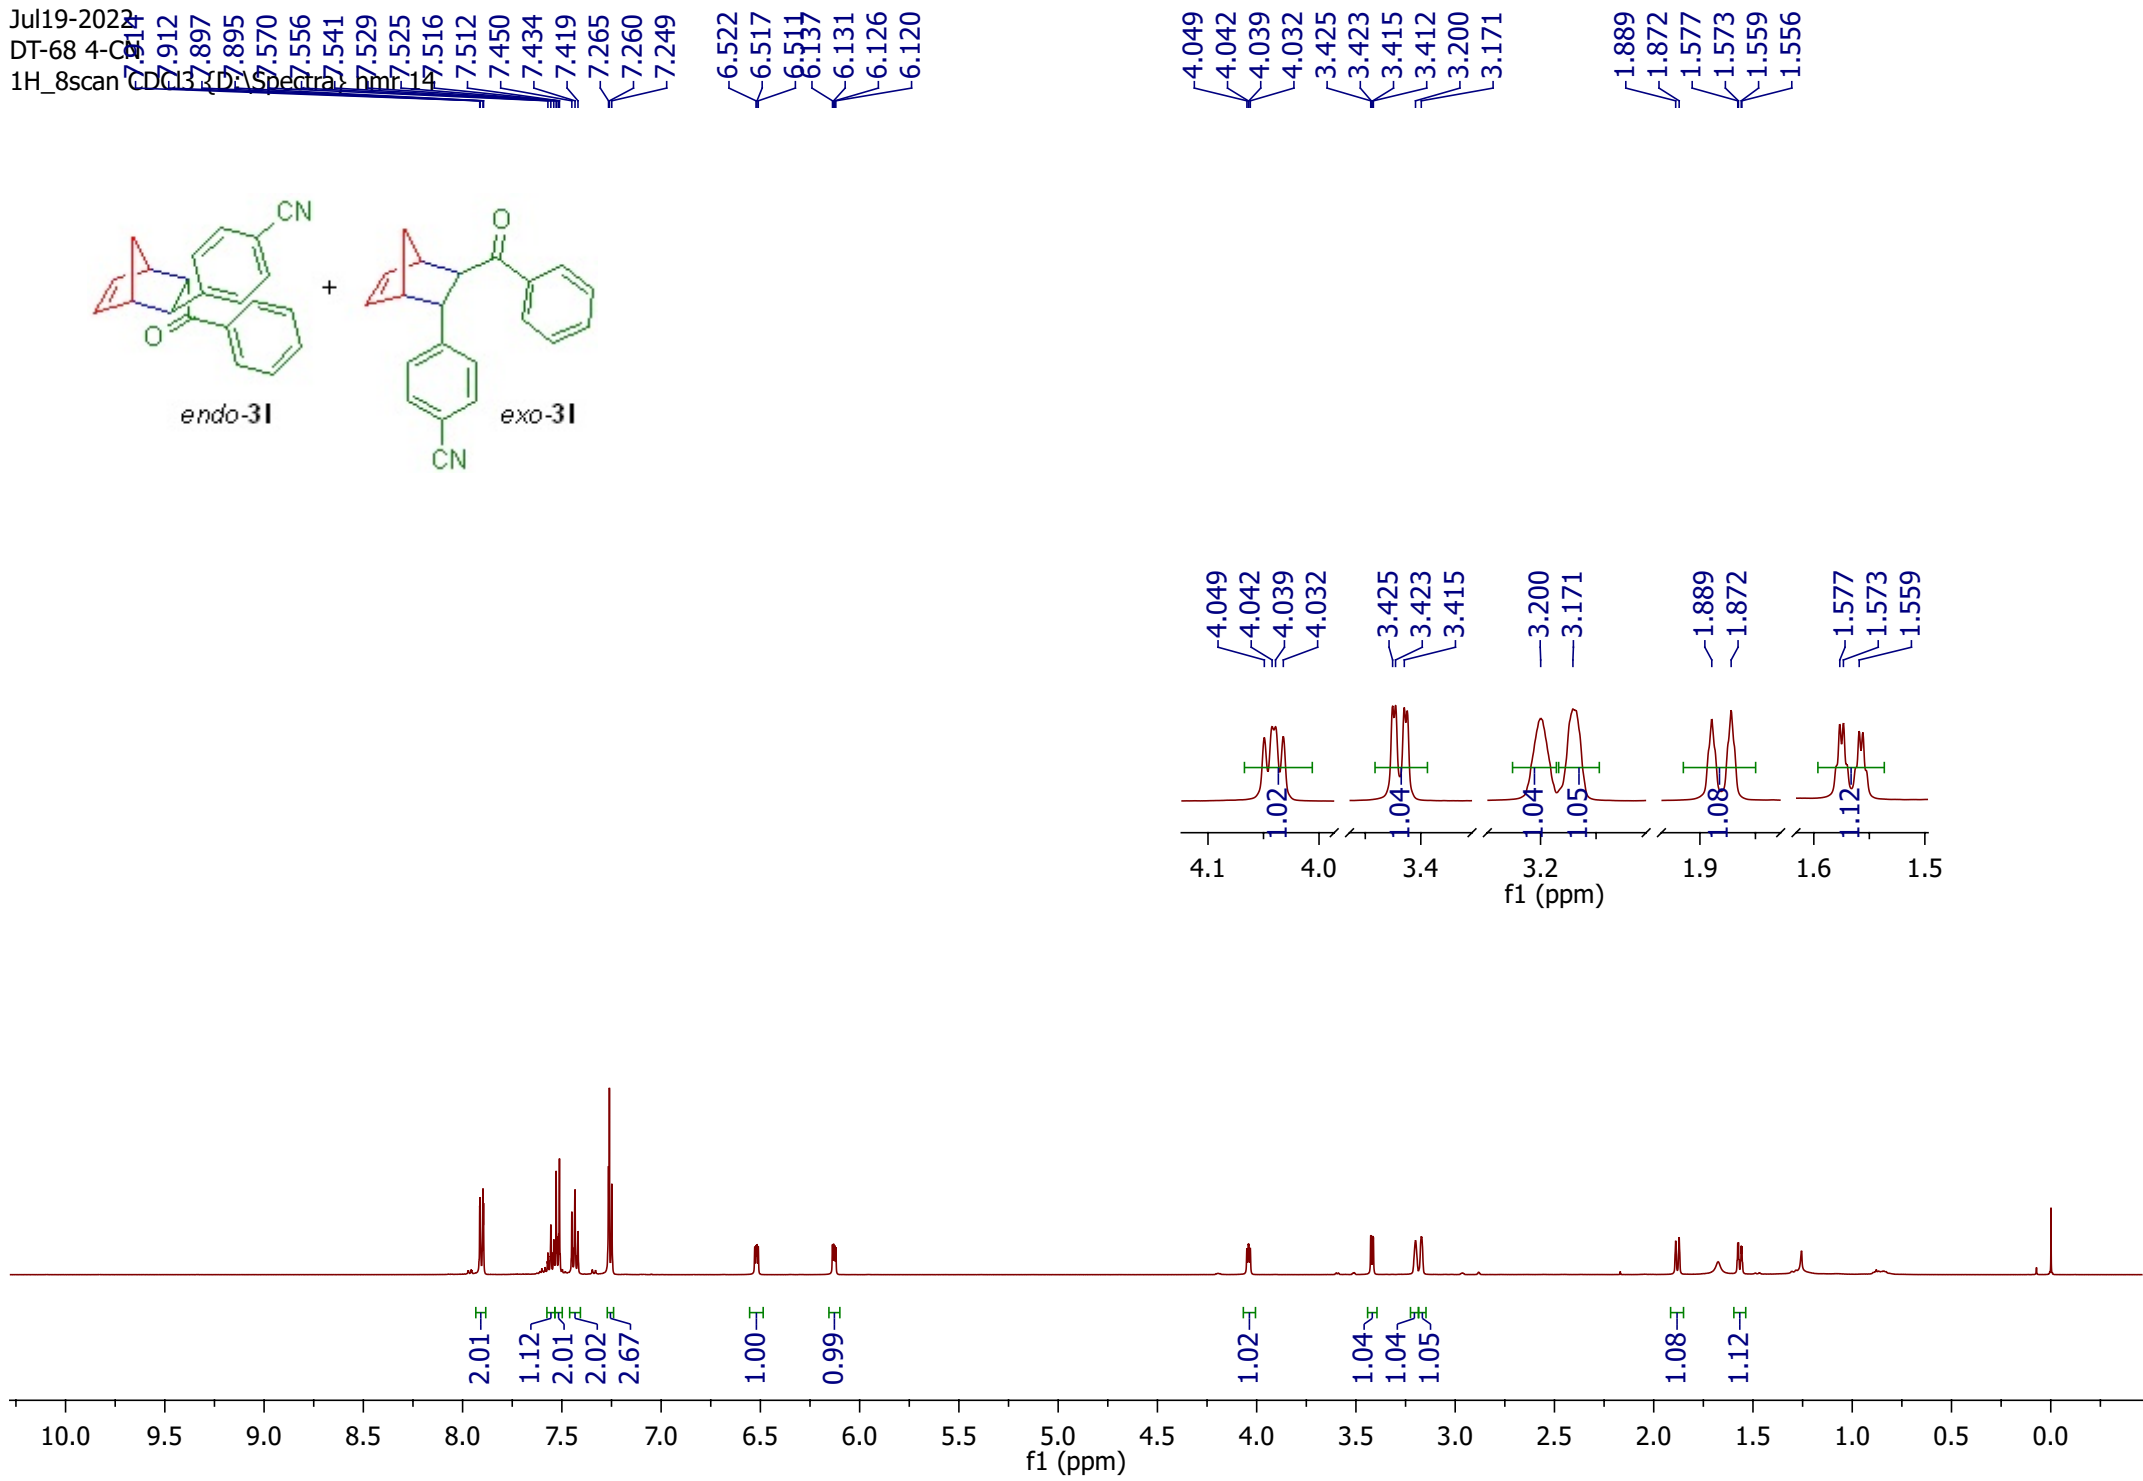

Jul19-2022  
DT-68 4-CN  
C13CPD CDCl3 {D:\Spectra} nmr 14

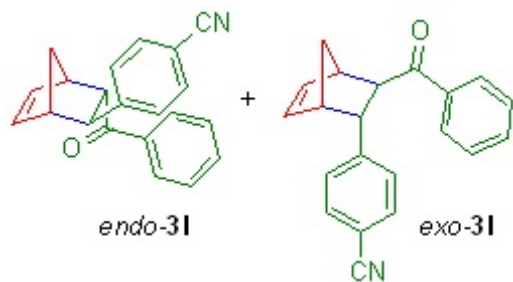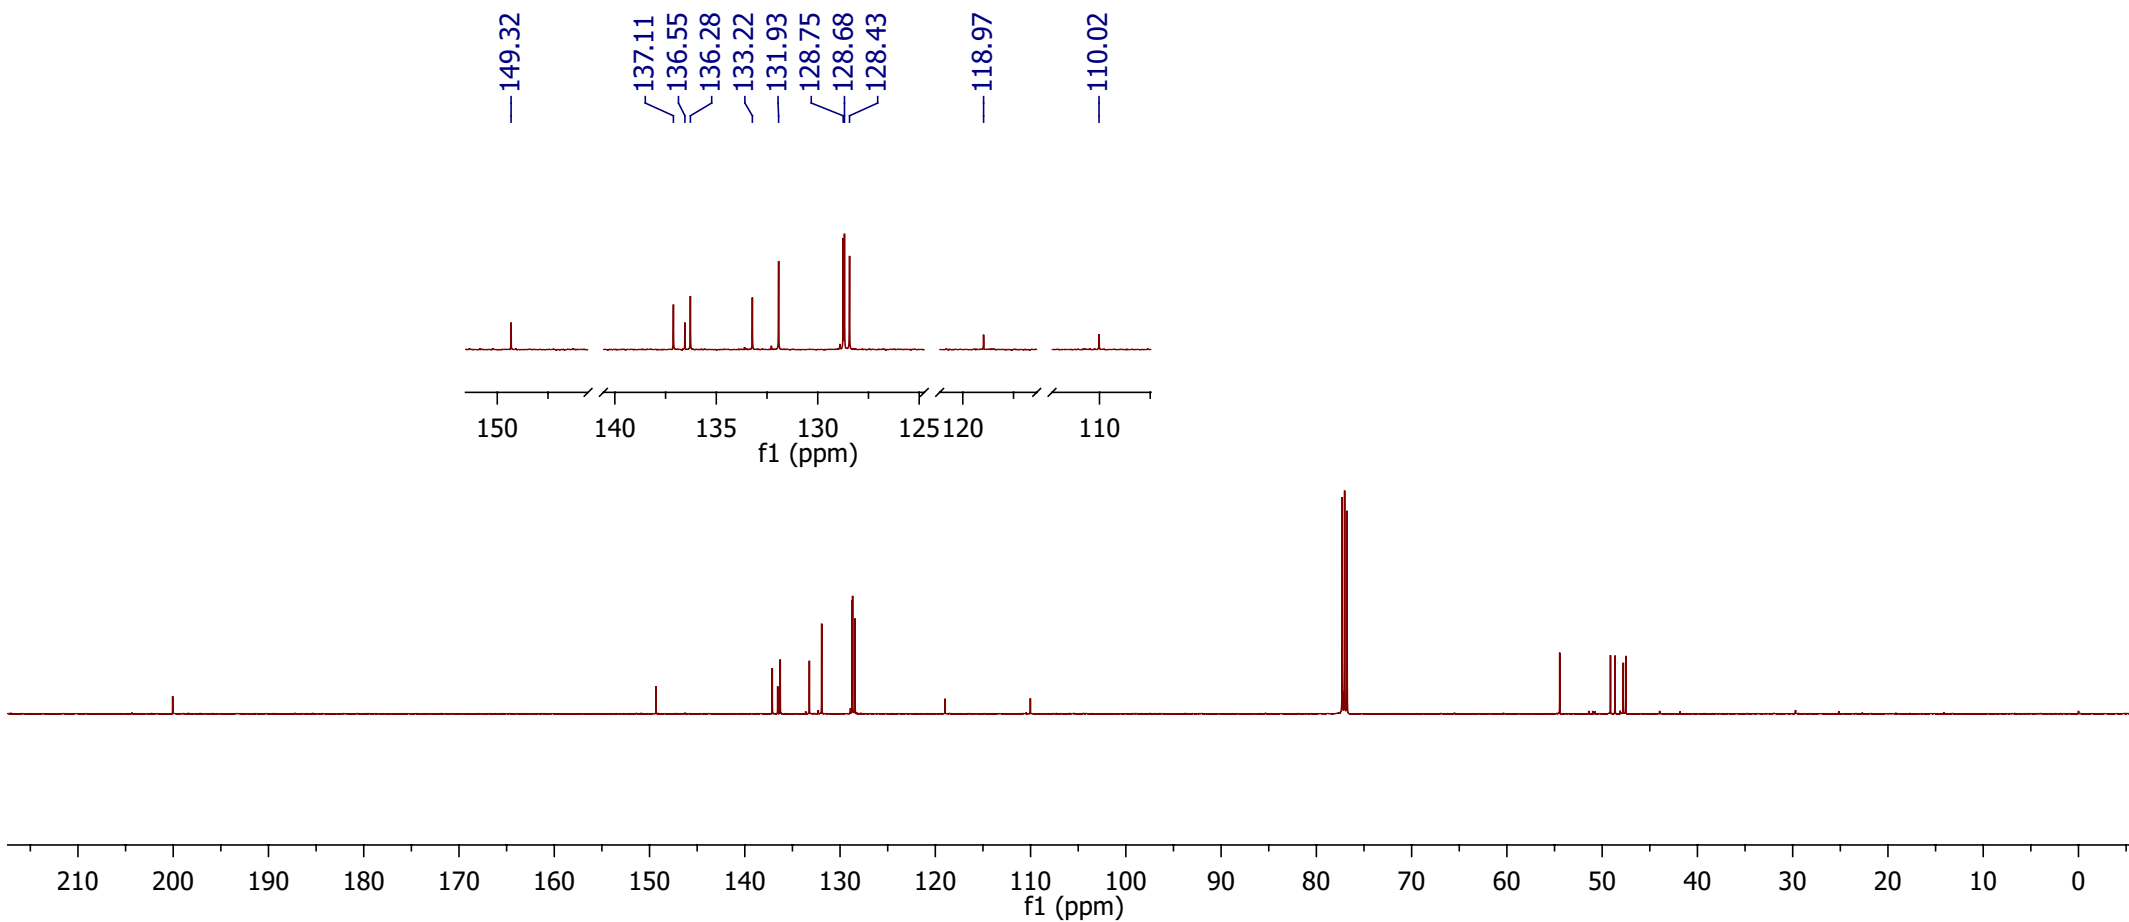

Sc 17-76pp-2022  
 1H-Scan CDCl3-D\Spectra\ nmr 6

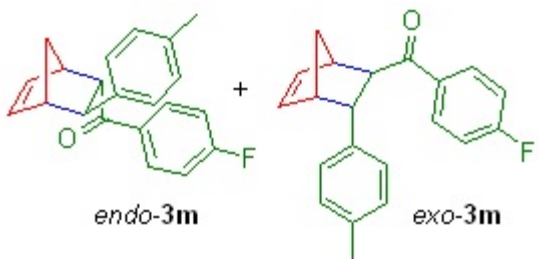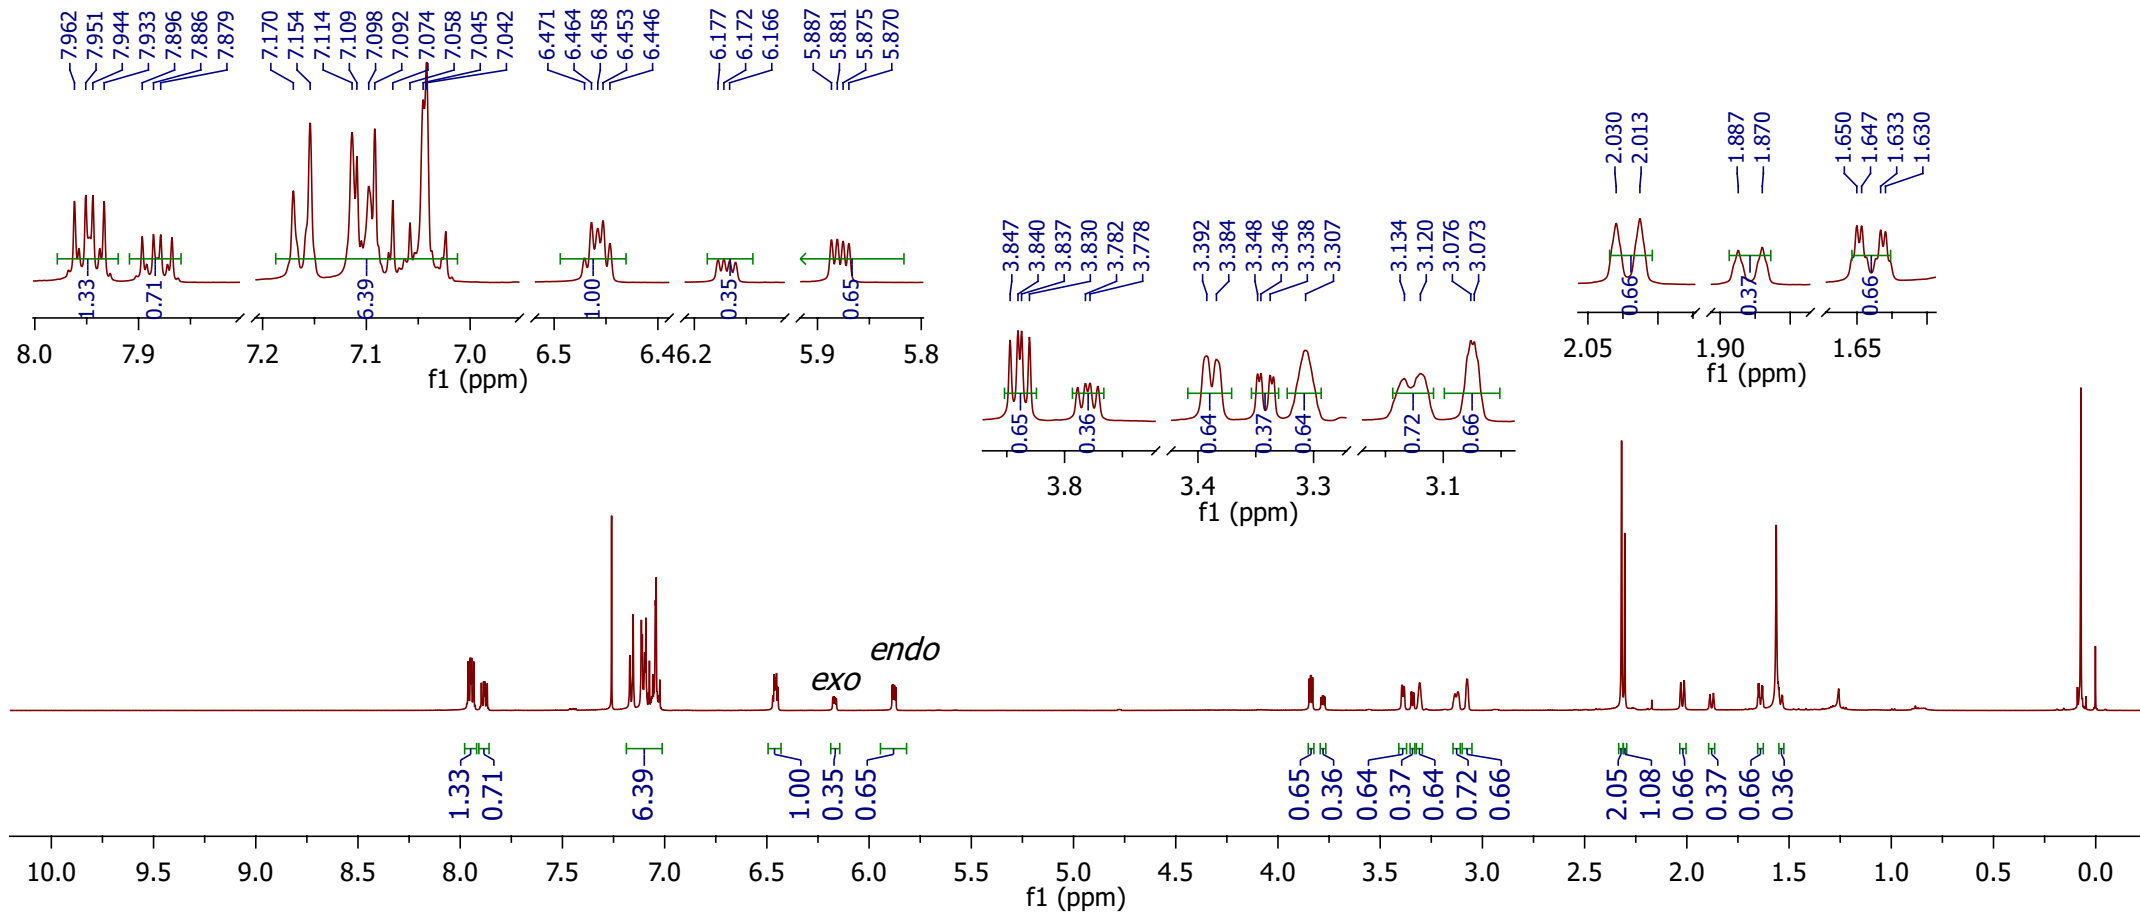

Sep30-2022  
DT-86  
C13CPD CDCI3 {D:\Spectra}

99.84  
98.54

141.42  
139.21  
136.90  
136.41  
135.61  
133.57  
132.86  
131.12  
131.05  
130.98  
130.91  
129.25  
128.87  
127.87  
127.35  
115.65  
115.61  
115.48  
115.44

77.27  
77.01  
76.76  
56.12  
54.53  
48.96  
48.78  
48.62  
48.47  
48.02  
47.94  
47.68  
45.72  
20.92

1.02

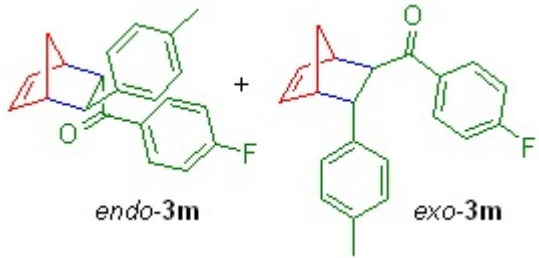

141.42  
139.21  
136.90  
136.41  
135.61  
133.60  
133.57  
132.86  
131.12  
131.05  
130.98  
130.91  
129.25  
128.87  
127.87  
127.35  
115.65  
115.61  
115.48  
115.44

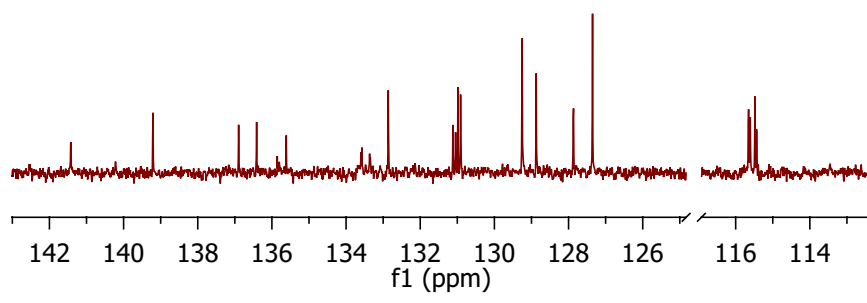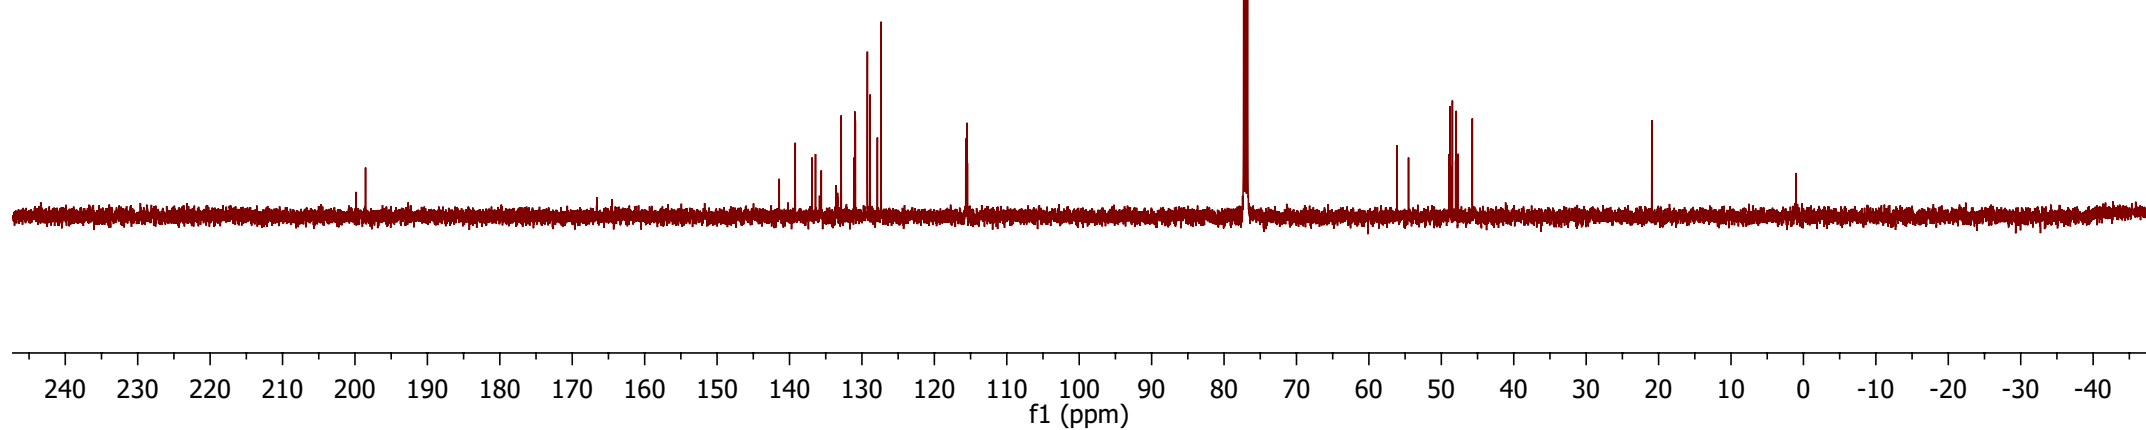

1H NMR spectrum (CDCl3) of compound 3n. The x-axis represents the chemical shift in ppm, ranging from 10.0 to -0.5. The spectrum shows several peaks, with integration values provided below the peaks. The chemical shift values are listed at the top of the image.

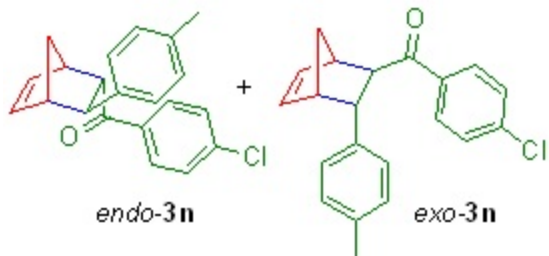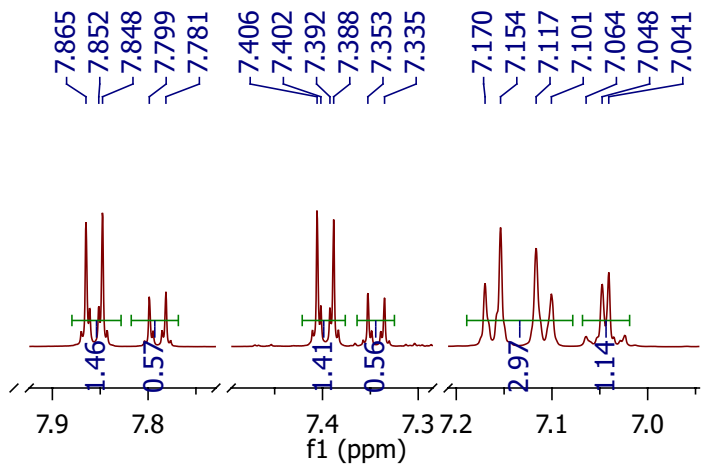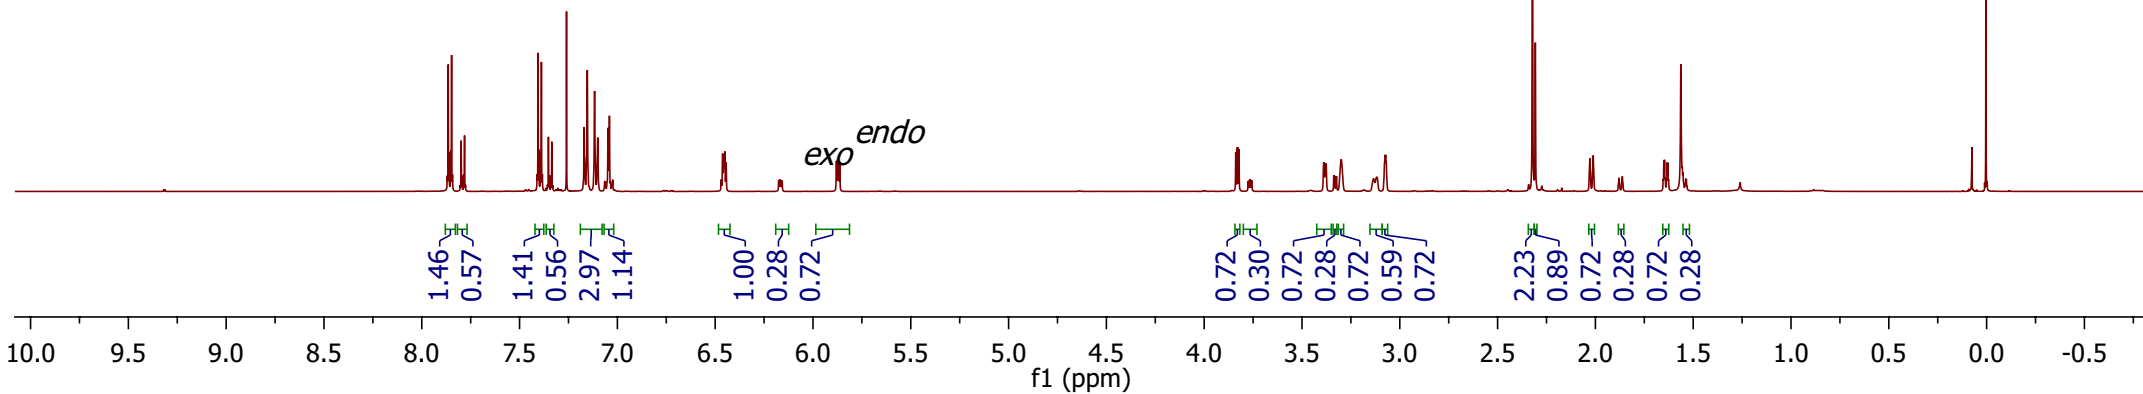

Jul27-2023  
DT-87  
C13CPD CDCl<sub>3</sub> (Spectra) nmr 48

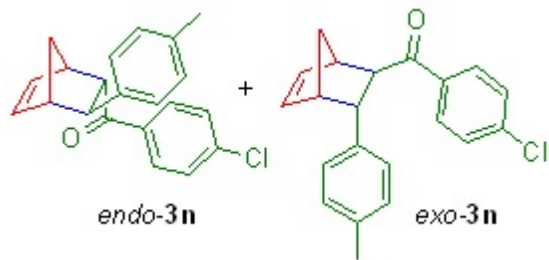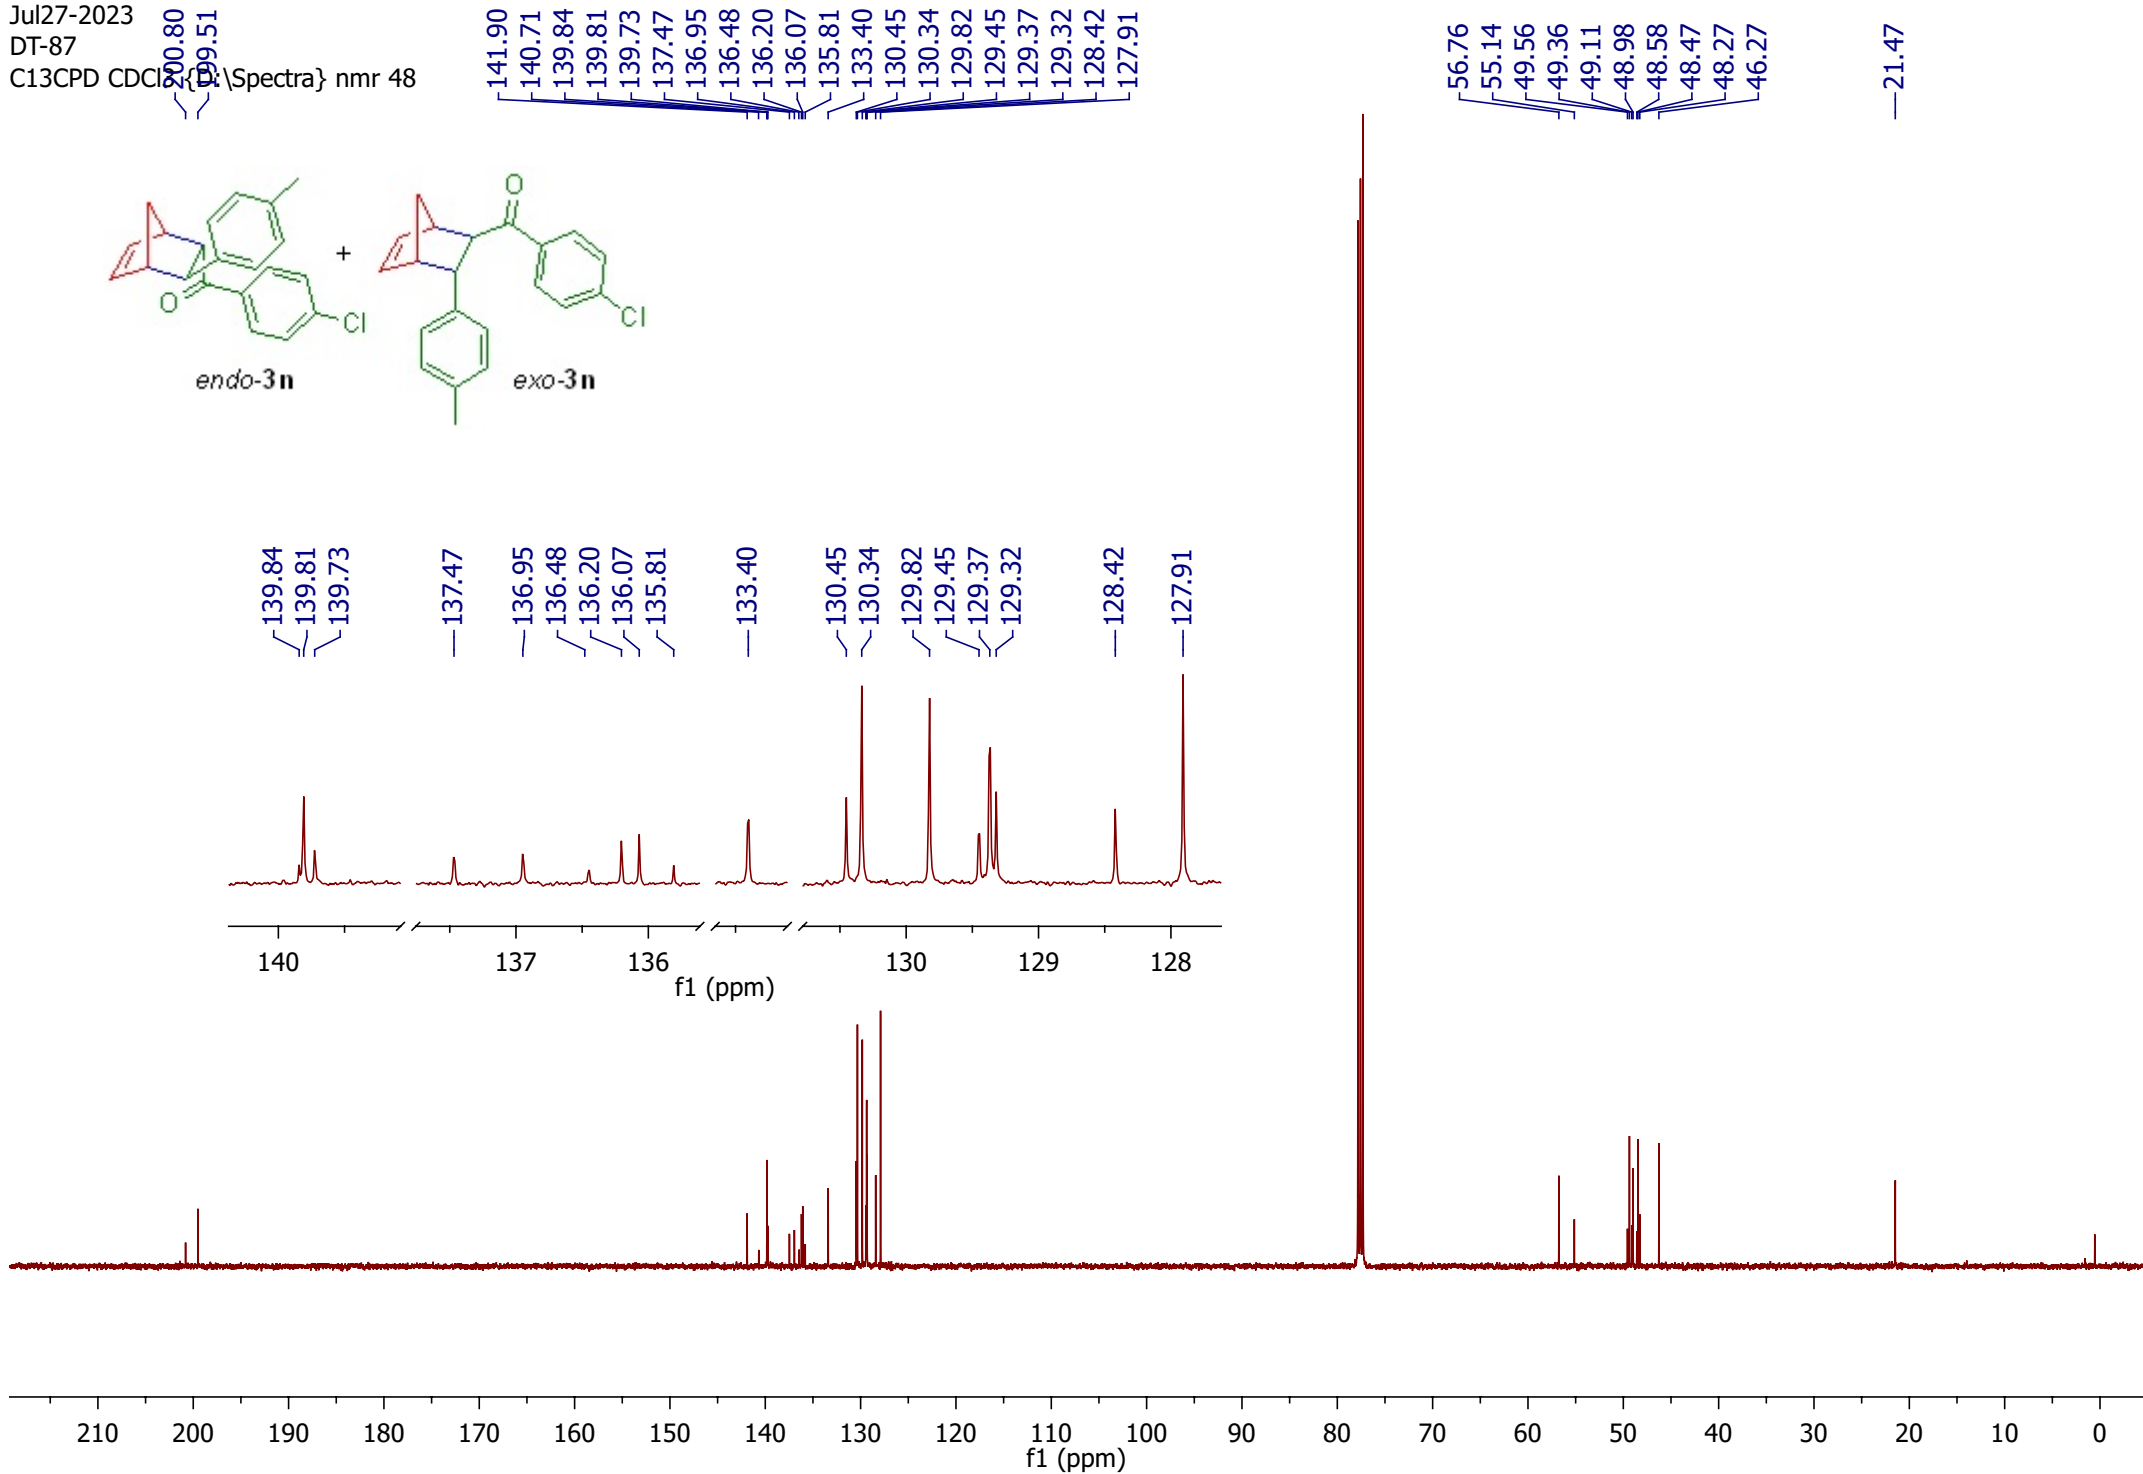

17.7847  
 17.7826  
 17.7799  
 17.7772  
 17.7723  
 17.7666  
 17.717  
 17.713  
 17.703  
 17.699  
 17.571  
 17.567  
 17.557  
 17.553  
 17.517  
 17.513  
 17.503  
 17.499  
 17.260  
 17.165  
 17.149  
 17.113  
 17.097  
 17.061  
 17.044  
 17.035  
 16.463  
 16.457  
 16.451  
 16.446  
 16.439  
 16.170  
 16.164  
 15.874  
 15.869  
 15.863  
 15.857  
 3.828  
 3.821  
 3.818  
 3.811  
 3.758  
 3.754  
 3.379  
 3.372  
 3.325  
 3.322  
 3.314  
 3.311  
 3.292  
 3.128  
 3.112  
 3.067  
 2.319  
 2.304  
 2.023  
 2.006  
 1.872  
 1.855  
 1.645  
 1.642  
 1.628  
 1.538  
 1.534  
 1.531  
 1.528

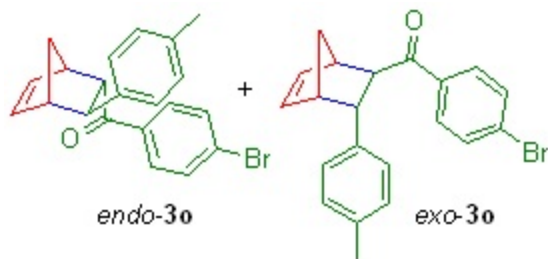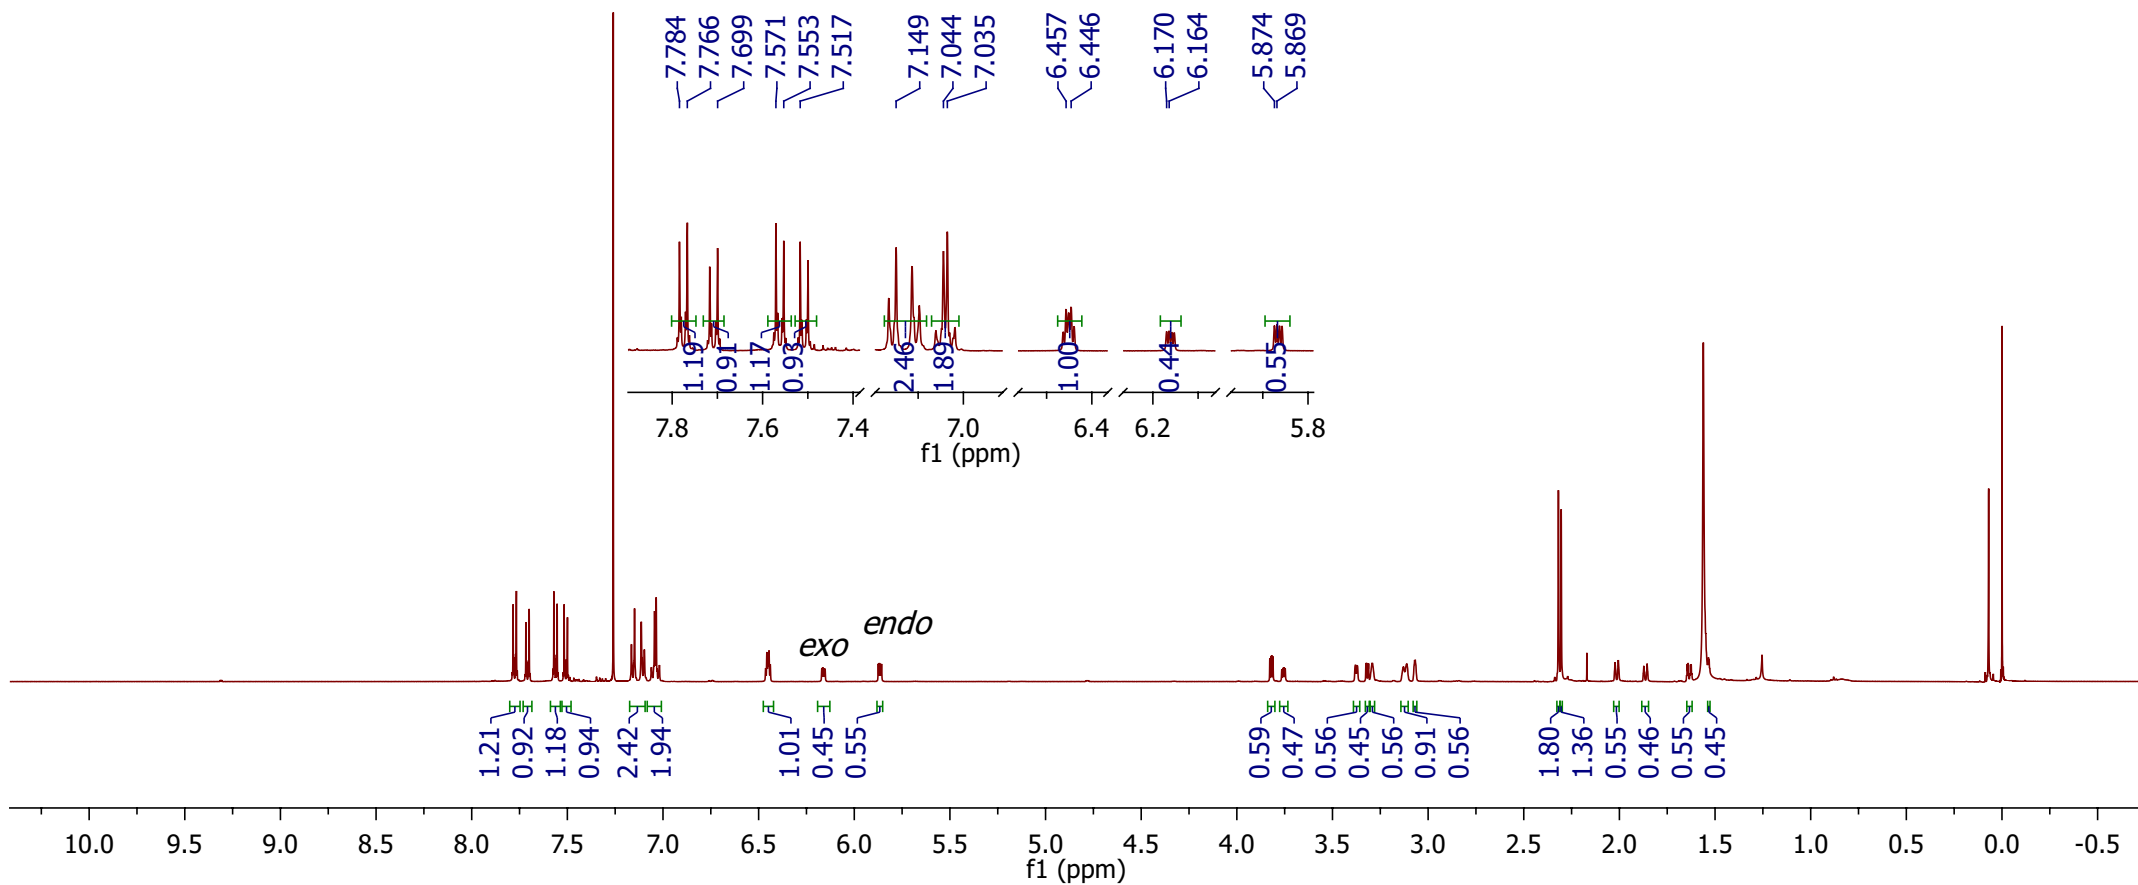

Jul26-2023  
DT-91  
C13CPD CDCI3

100.63  
77.16  
76.90

Spectra

nmr 26

141.47  
140.24  
139.41  
137.06  
136.53  
136.06  
135.80  
132.99  
131.95  
131.90  
130.16  
130.05  
129.42  
129.05  
128.17  
128.00  
127.49

77.41  
77.16  
76.90

56.34  
54.70  
49.16  
48.95  
48.68  
48.56  
48.17  
48.05  
47.87  
45.85

21.06

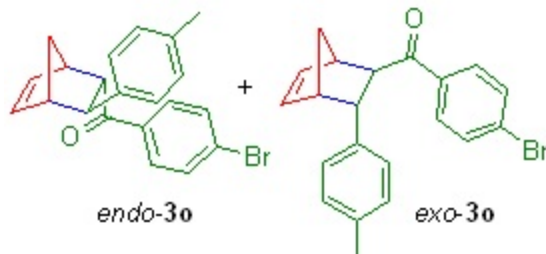

141.47  
140.24  
139.41  
137.06  
136.53  
136.06  
135.80  
132.99  
131.95  
131.90  
130.16  
130.05  
129.42  
129.05  
128.17  
128.00  
127.49

49.16  
48.95  
48.68  
48.56  
48.17  
48.05  
47.87

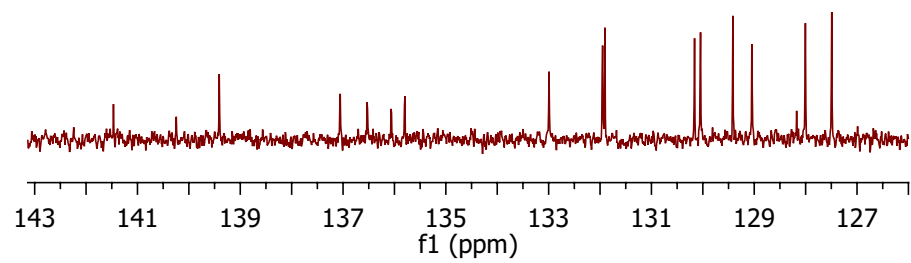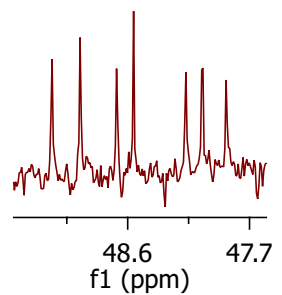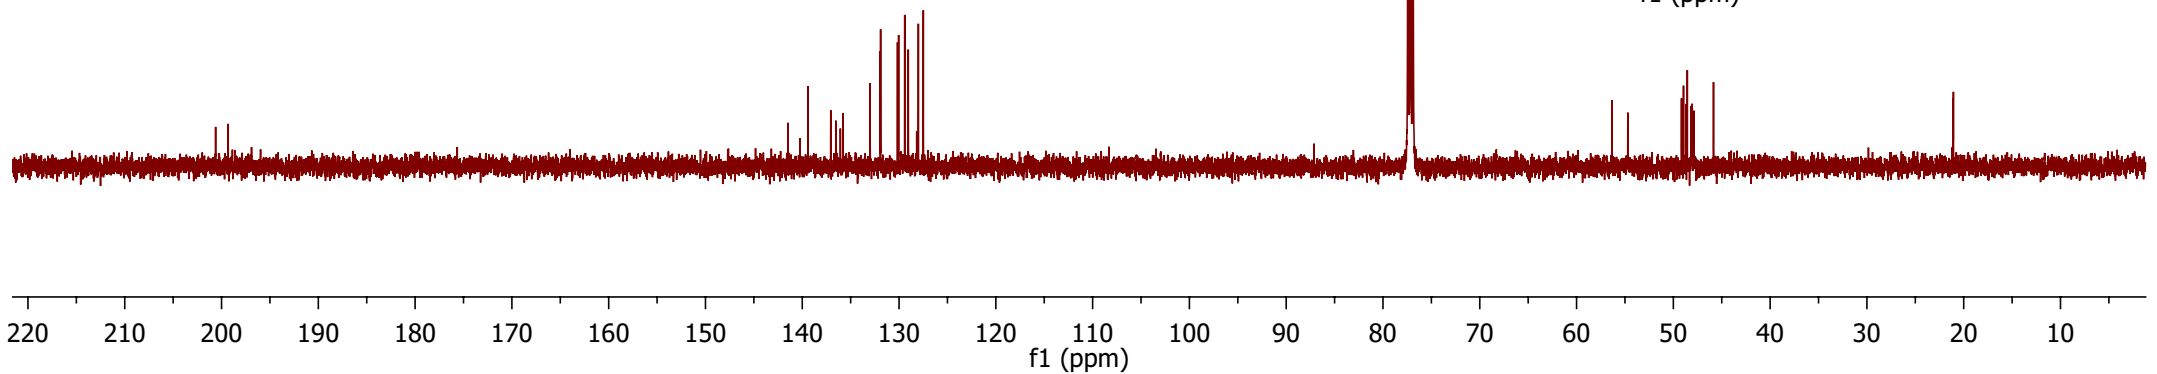



new finalised NMR  
D:\1H scan CDCl3 (D)\Spectra\hmr\_9  
17.748  
7.933  
7.921  
7.921  
7.889  
7.878  
7.874  
7.865  
7.860  
7.855  
7.260  
7.176  
7.160  
7.106  
7.090  
7.045  
6.915  
6.911  
6.901  
6.897  
6.872  
6.868  
6.859  
6.854  
6.465  
6.459  
6.453  
6.448  
6.442  
6.171  
6.165  
6.160  
6.154  
5.889  
5.883  
5.877  
5.872  
3.869  
3.842  
3.425  
3.416  
3.362  
3.359  
3.352  
3.349  
3.313  
3.138  
3.079  
3.076  
2.315  
2.299  
2.021  
2.004  
1.912  
1.895  
1.635  
1.629  
1.618  
1.612  
1.534  
1.528  
1.517  
1.510

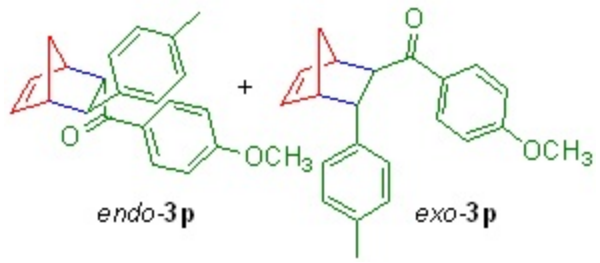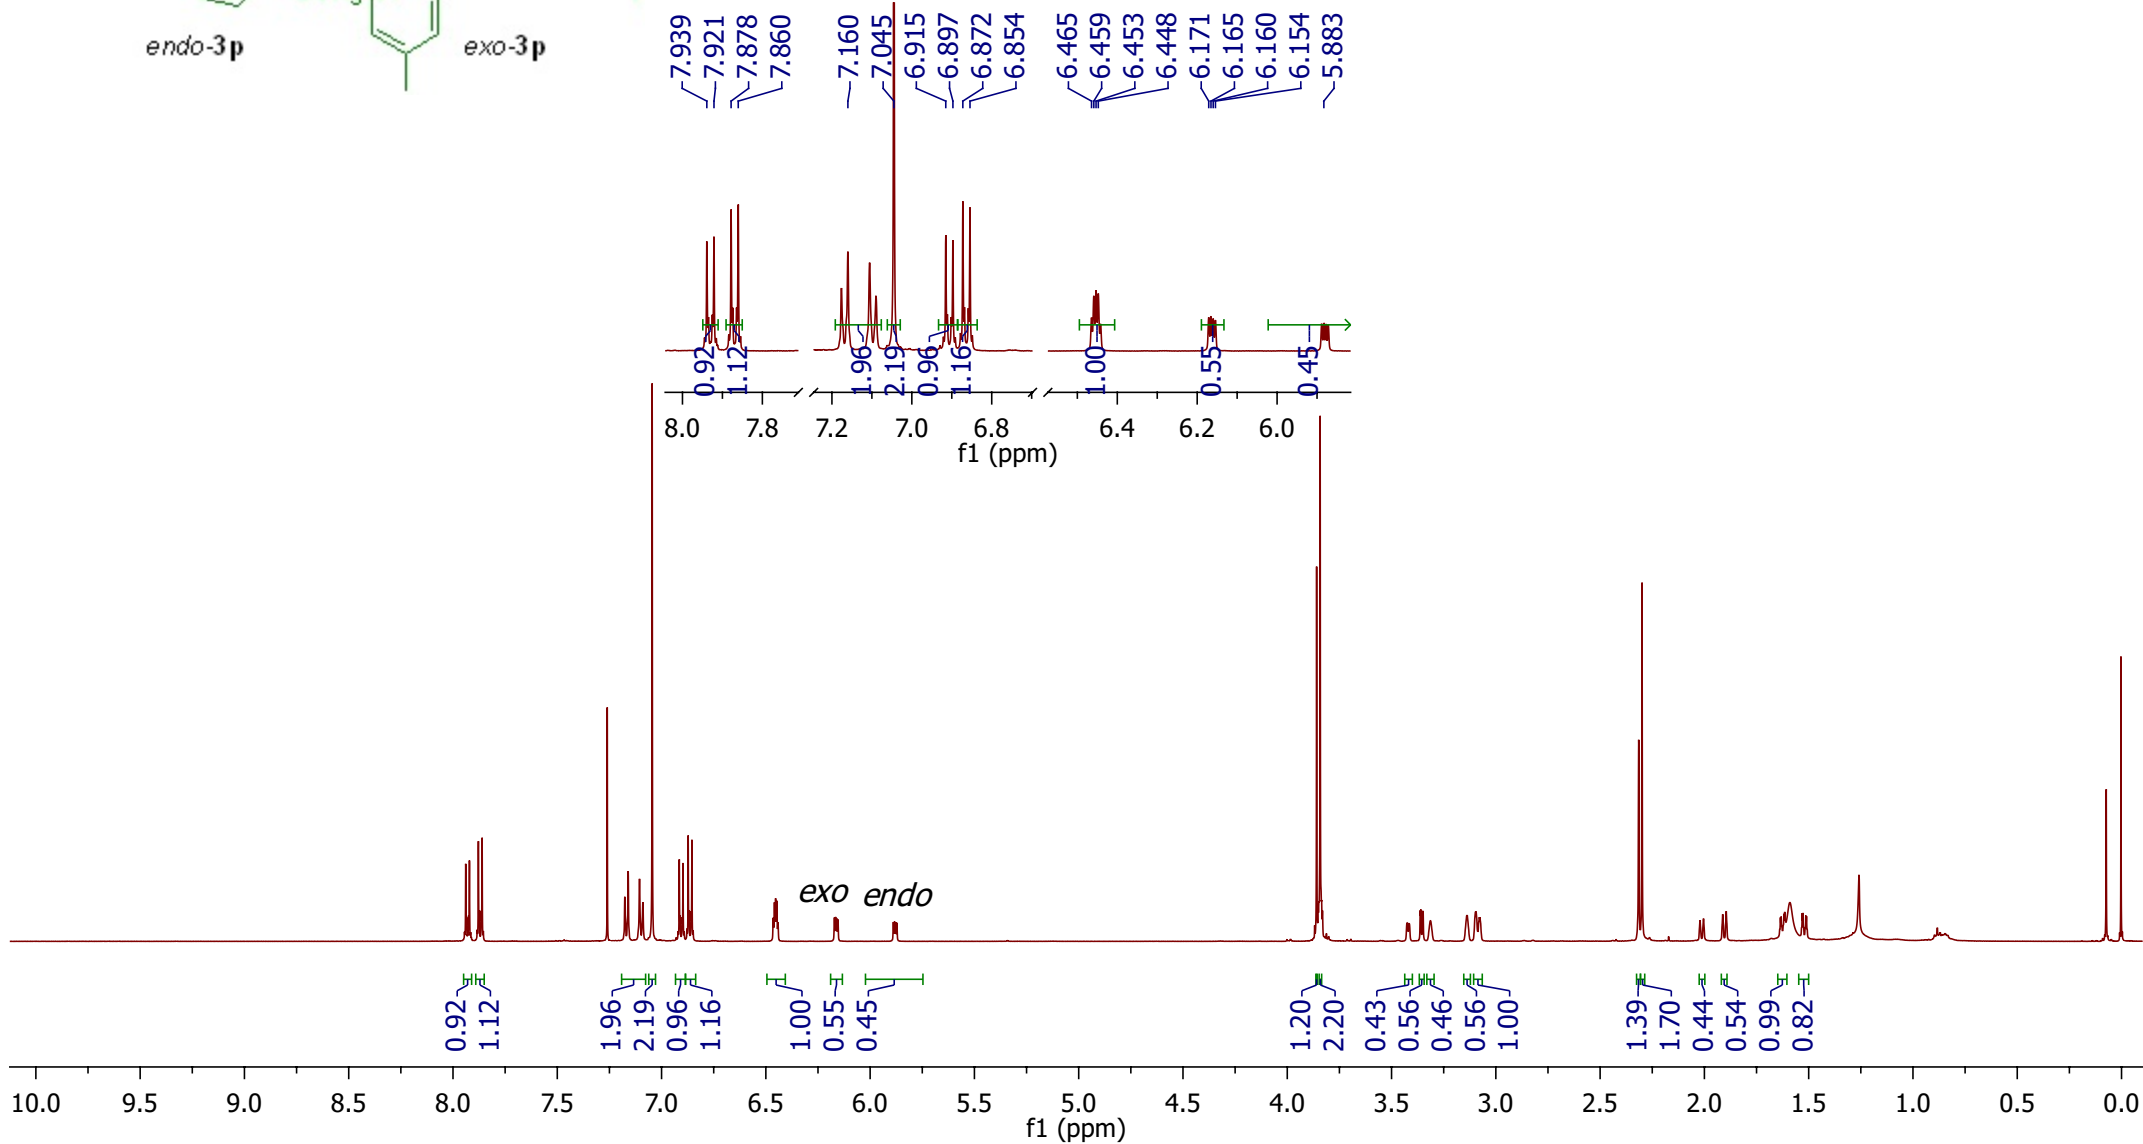

new finalised NMRs  
DT-88  
C13CPD CDC13-D<sub>2</sub> (Spectra) nmr 9

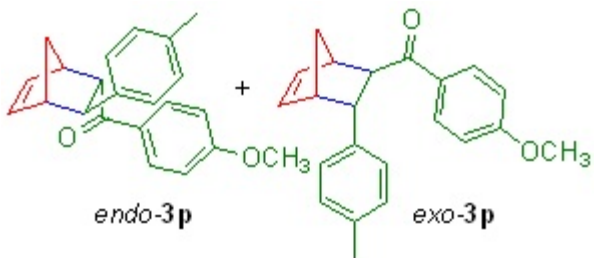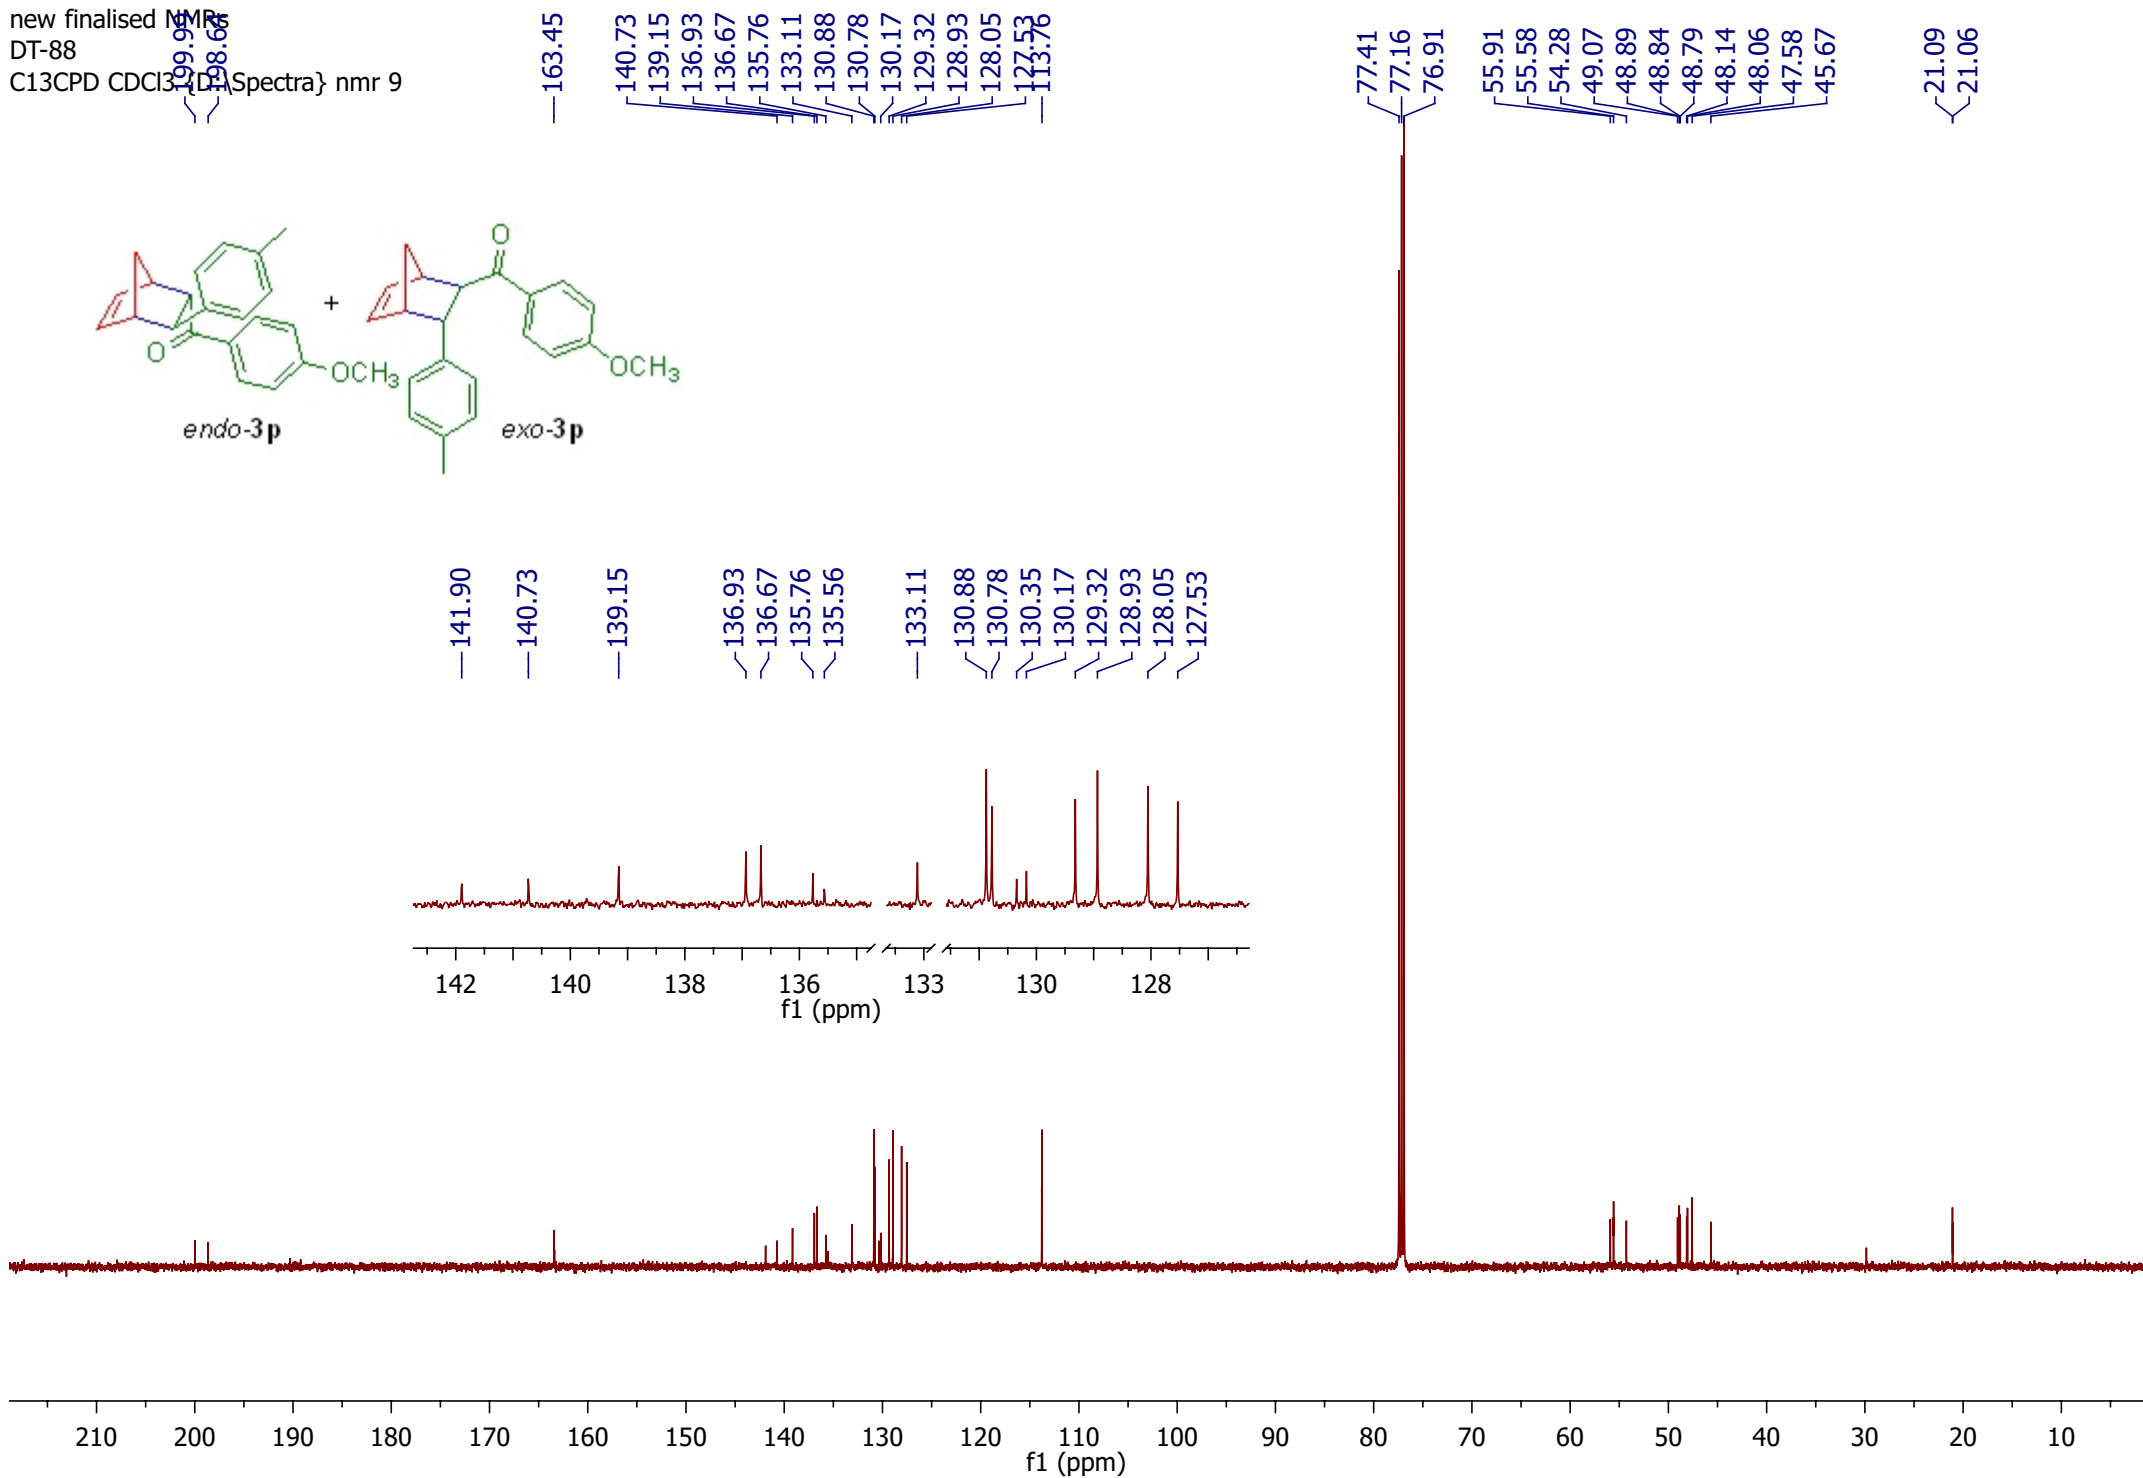

Oct13-2022

DT-89

<sup>1</sup>H\_8scan CDCl<sub>3</sub> {D:\Spectra} nmr 41

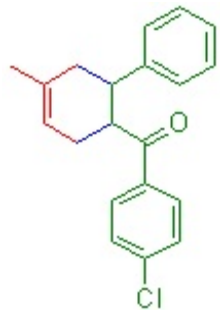

5c (major)

+

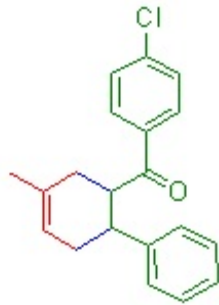

5c' (minor)

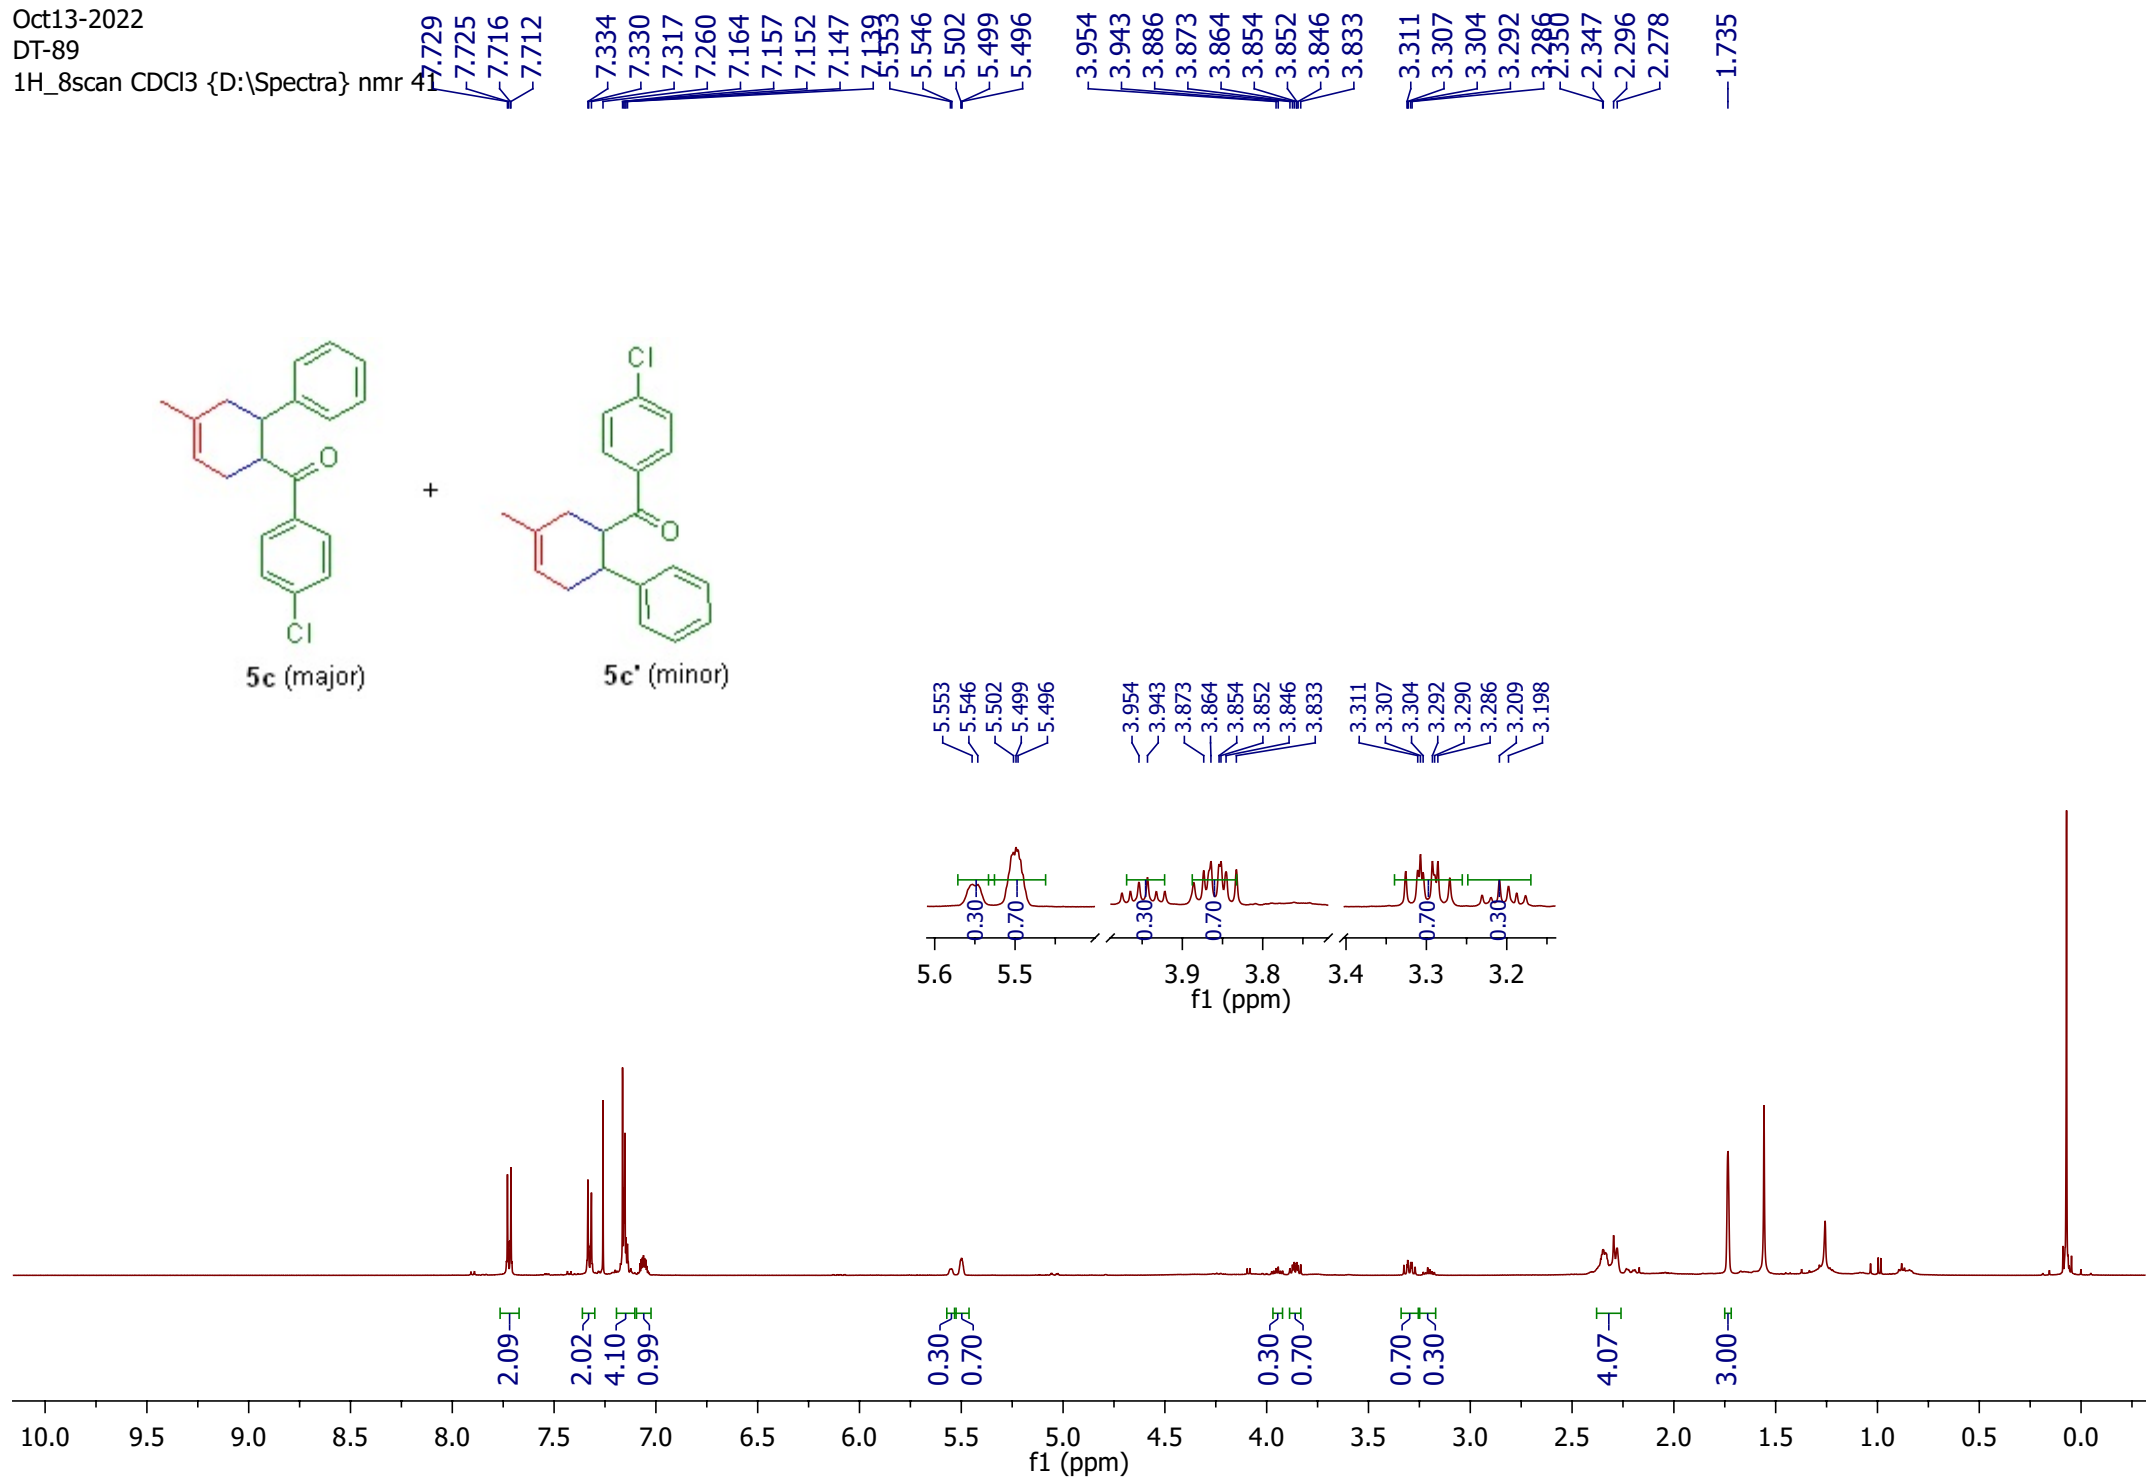

Oct13-2022  
DT-89  
C13CPD-GD-13 {D:\Spectra} nmr 41

144.45  
144.28  
139.26  
139.24  
135.74  
134.20  
129.49  
128.82  
128.47  
128.42  
127.54  
127.49  
126.40  
120.97  
119.17

77.35  
77.09  
76.84

47.29  
46.77  
42.99  
42.65  
38.86  
35.12  
34.02  
30.80  
29.79  
23.23

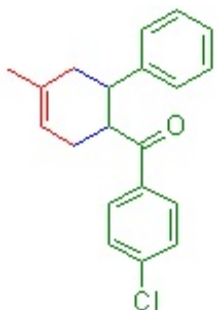

5c (major)

+

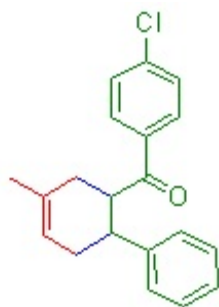

5c' (minor)

202.70  
202.63

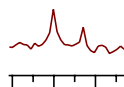

f1 (ppm)

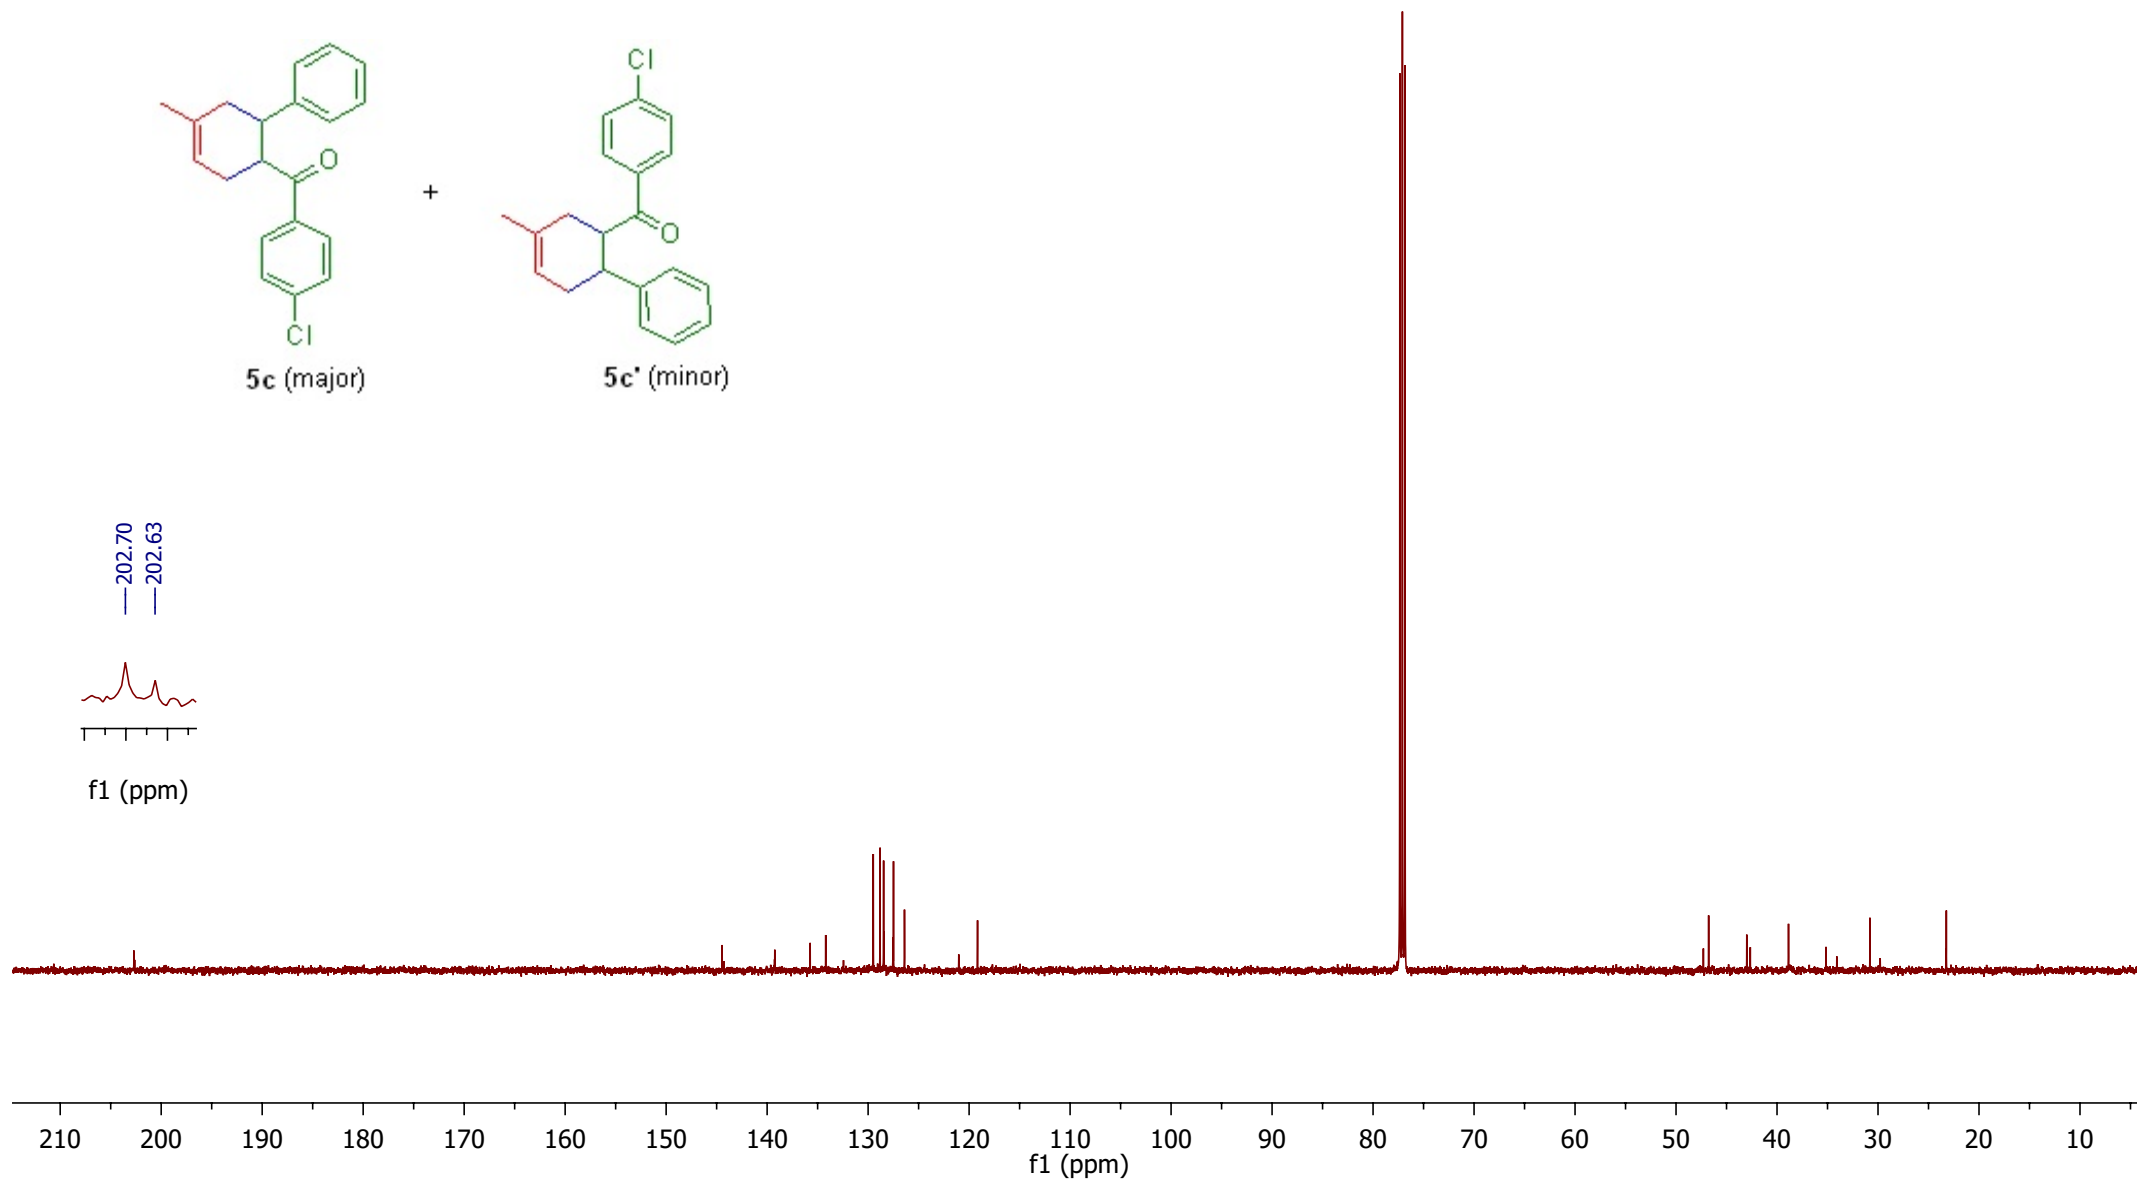

Dec08-2022  
DT-90-Br  
1H\_8scan CDCl3 (D) Spectra

7.652 7.648 7.638 7.634 7.502 7.498 7.488 7.485 7.260 7.163 7.155 7.153 7.151 7.145 7.141 7.080 7.073 7.070 7.063 7.059 7.055 7.052 5.554 5.545 5.500 5.497 5.494 3.946 3.936 3.878 3.866 3.857 3.847 3.844 3.838 3.825 3.324 3.305 3.291 3.284 2.344 2.341 2.294 2.278 1.733

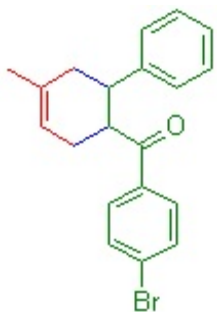

5d (major)

+

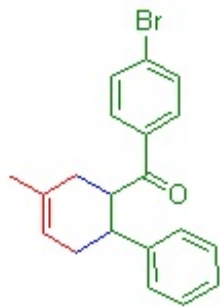

5d' (minor)

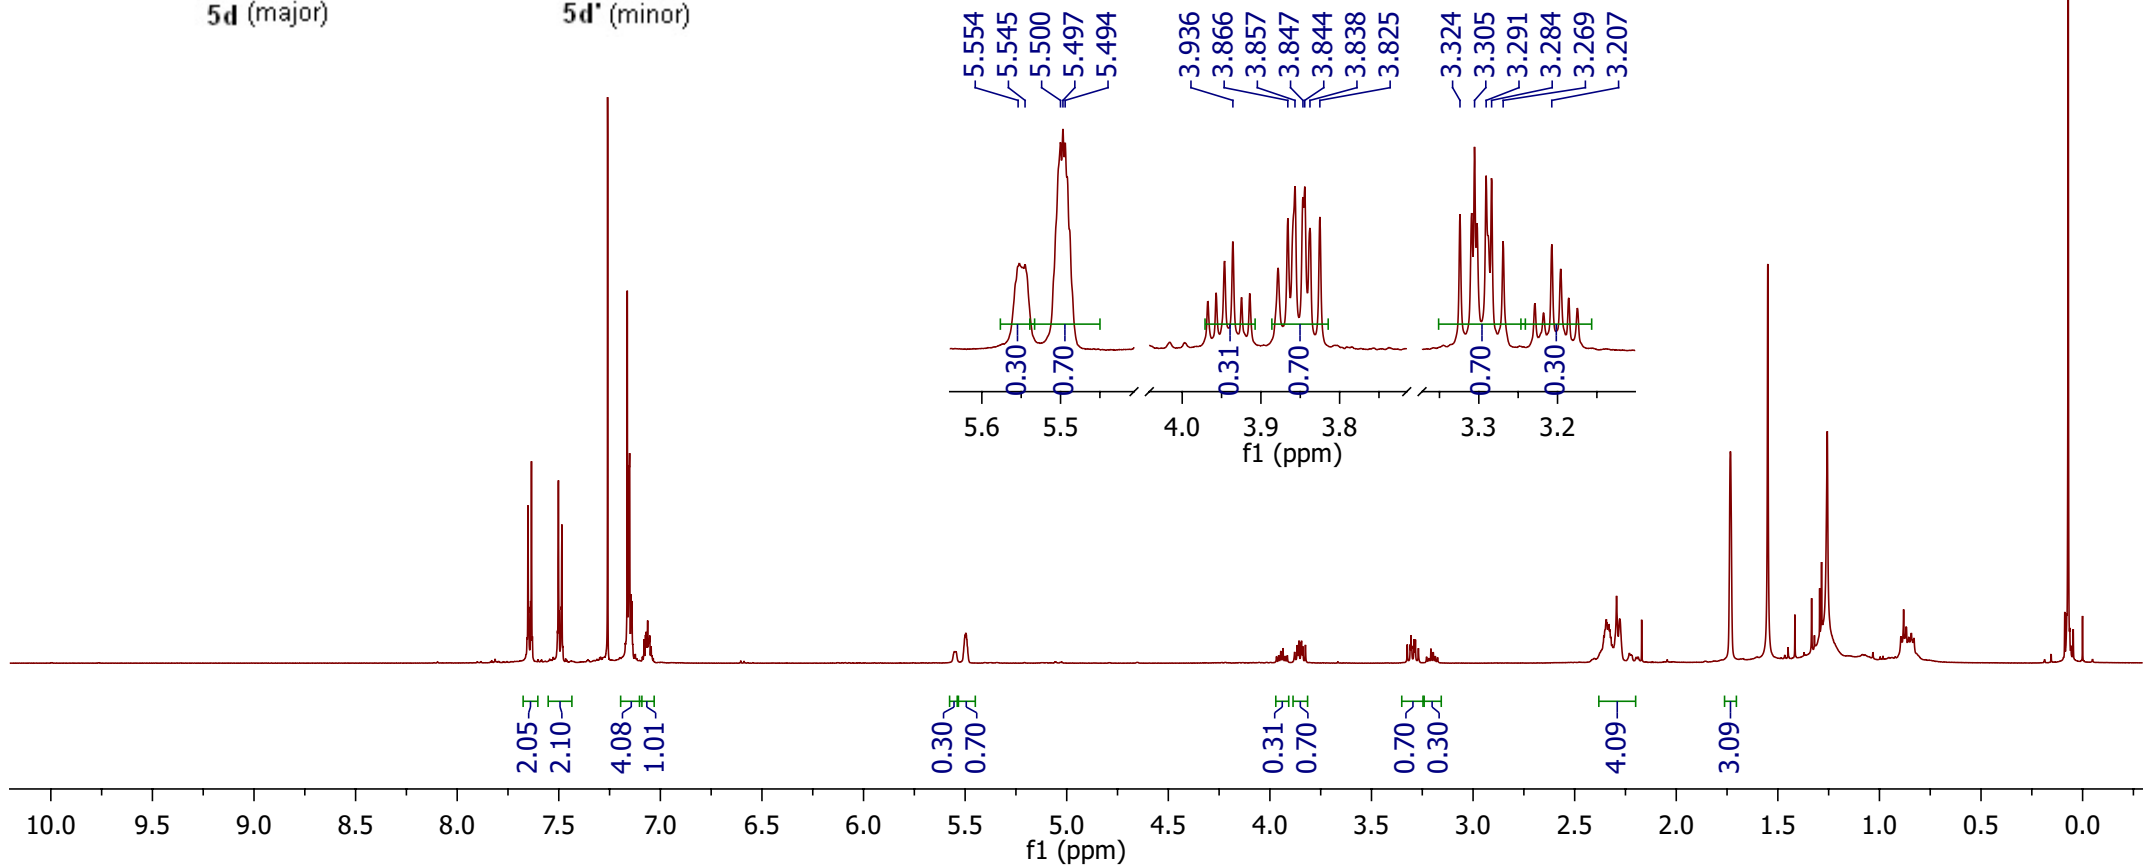

Dec08-2022  
DT-90-Br  
C13CPD\_003 {D:\Spectra} nmr 18

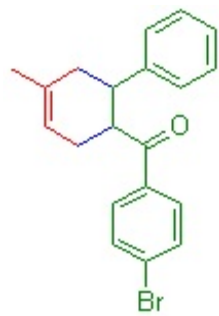

5d (major)

+

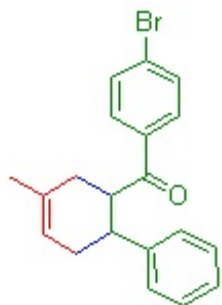

5d' (minor)

144.44  
136.15  
134.21  
131.82  
129.60  
128.48  
128.43  
127.97  
127.54  
127.48  
126.41  
121.03  
119.16

77.35  
77.09  
76.84

47.20  
46.77  
42.98  
42.61  
38.86  
38.20  
35.15  
34.00  
30.80  
29.79  
29.47  
23.24

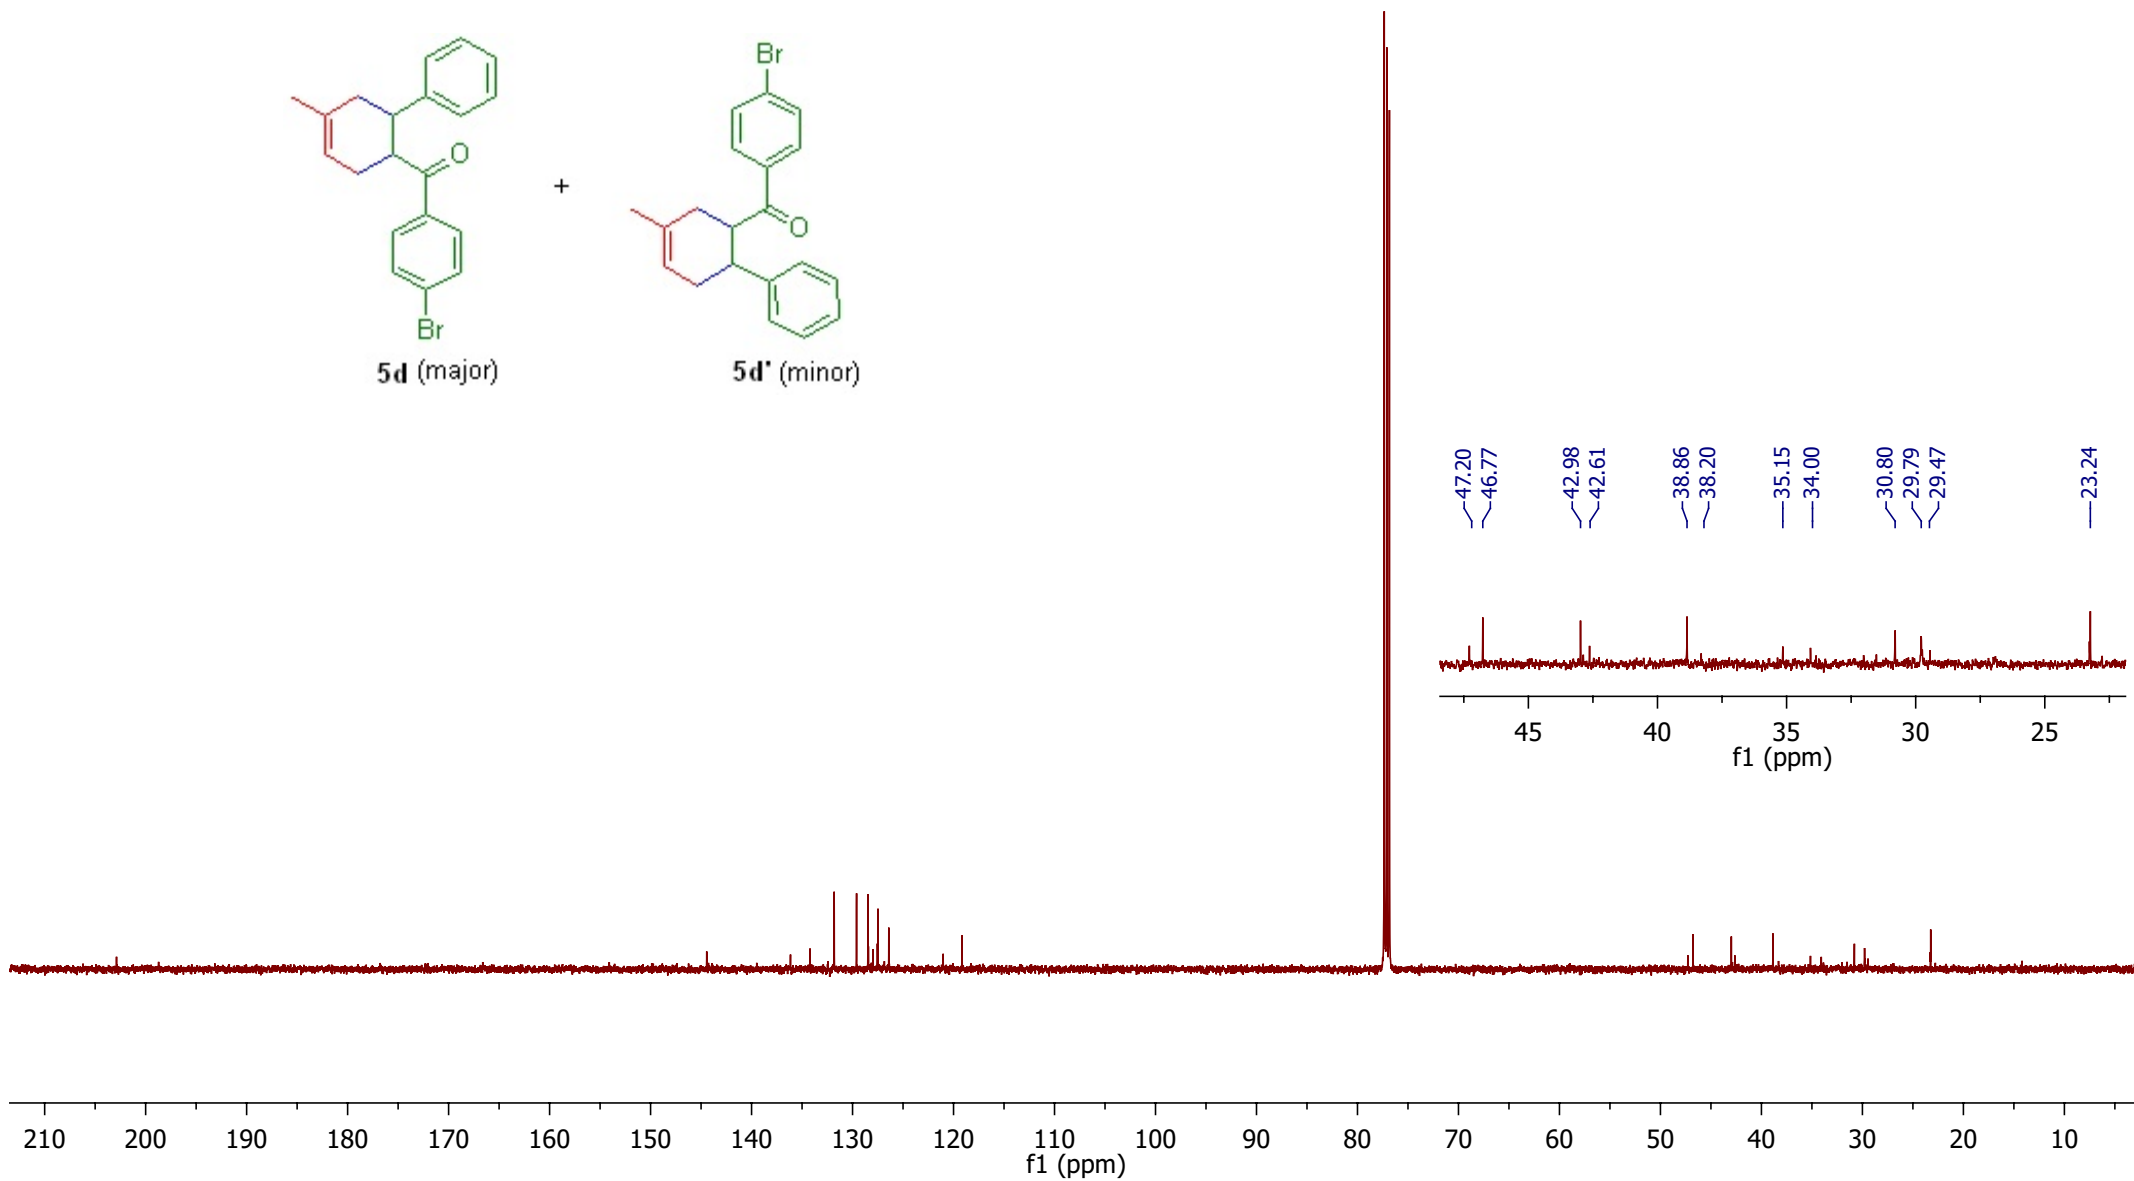

Supplement: d3cc02290k1.pdf [file d3cc02290k1.pdf]
